# Supplementary material for: Elementary mode analysis reveals that Clostridium acetobutylicum modulates its metabolic strategy under external stress
Source: Royal Society of Chemistry journal article supplement (doi:10.1039/c4mb00126e), 2014-05-14
Supplement: c4mb00126e2.xlsx [file c4mb00126e2.xlsx]

## Sheet: A EMs
Calculation of A matrix for 10 external metabolites and 67 elementay modes calculated from metabolic netwowrk of C. acetobutylicum
name\EMs	1	2	3	4	5	6	7	8	9	10	11	12	13	14	15	16	17	18	19	20	21	22	23	24	25	26	27	28	29	30	31	32	33	34	35	36	37	38	39	40	41	42	43	44	45	46	47	48	49
H2 = (EX)H2	0	0	0	0	0	0	0	2	2	2	2	2	4	5119	8280	3639	12397	3639	0	0	2	2	4	12397	0	0	0	0	0	0	0	0	0	10	10	10	10	22434	3639	58824	7278	0	0	0	0	0	0	0	0
BIOMASS = (EX)BIOMASS	0	0	0	8956	4478	17912	4478	0	0	0	0	0	0	6717	4478	2239	11195	2239	0	17912	0	0	0	11195	0	0	0	0	0	8956	11195	49258	4478	0	0	0	0	35824	2239	58214	4478	0	0	0	0	0	0	8956	4478
CO2 = (EX)CO2	2	4	4	28854	18745	66344	18745	2	3	5	5	3	5	19081	24889	11192	41465	11192	4	66344	5	5	5	41465	10	22	12	11	7	26094	52082	182446	20125	10	26	16	13	96898	11872	215618	22551	6	4	14	14	22	11	24714	12624
AC = (EX)AC	0	-2	-4	4318	-2159	0	0	1	0	-4	-5	-1	0	5798	-1002	-2899	0	0	-4	0	-4	-5	0	0	2	-22	-2	0	0	7078	-10617	0	0	6	-26	-6	0	35790	-3579	0	0	-2	0	-18	-18	-22	0	178	0
BUTY = (EX)BUTY	0	-2	0	0	0	0	-2159	0	-1	-1	0	0	0	0	-7301	0	0	-2899	0	0	-1	0	0	0	0	0	0	0	-1	0	0	0	-3539	0	0	0	0	0	0	0	-5965	4	1	4	4	0	0	8280	4318
ACT = (EX)ACT	0	2	2	0	2159	4318	2159	0	1	3	3	1	1	0	7301	2899	5798	2899	2	4318	3	3	1	5798	0	12	2	1	1	0	10617	21234	3539	0	16	6	3	0	3579	35790	5965	0	0	8	8	12	1	0	0
ET = (EX)ET	2	0	2	16560	10439	37438	8280	1	0	0	1	1	2	7301	0	3400	14101	501	2	37438	0	1	2	14101	0	0	0	0	0	0	0	0	0	0	0	0	0	0	0	0	0	0	0	0	0	0	0	0	0
BUT = (EX)BUT	0	2	0	0	0	0	2159	0	1	1	0	0	0	0	7301	0	0	2899	0	0	1	0	0	0	4	4	4	4	3	5520	10439	37438	6299	2	2	2	2	14602	1360	28202	6299	0	1	0	0	4	4	0	0
H2O = (EX)H2O	2	2	2	25358	14838	55034	14838	2	2	2	2	2	4	16459	15840	7419	31297	7419	2	55034	2	2	4	31297	10	10	10	10	6	22598	37095	141984	14838	10	10	10	10	82914	7419	157104	14838	6	4	6	6	10	10	21218	10876
External Glucose	1	1	1	13261	7710	28681	7710	1	1	1	1	1	2	8666	8211	3855	16376	3855	1	28681	1	1	2	16376	5	5	5	5	3	11881	19275	74193	7710	5	5	5	5	43785	3855	82335	7710	3	2	3	3	5	5	11191	5729
	Ax=b
Description of matrix (A):
Rows – External Metabolite
Columns – EMs
Elements of matrix indicate stoichiometry coefficients of external metabolites in all elementary modes.
x: flux vector of elementary modes
b: vector of accumulation of external metabolites
Calculation of A' matrix
Experimentally we measured the accumulation rates of BIOMASS, AC, BUTY, ACT, ET, BUT and External gluocse and we did not measure H2, CO2 and H2O
Further, objective function as maximization of the evaluation rate of hydrogen
Therefore, following matrix (A') omiting the rows of H2, CO2, H2O
name\EMs	1	2	3	4	5	6	7	8	9	10	11	12	13	14	15	16	17	18	19	20	21	22	23	24	25	26	27	28	29	30	31	32	33	34	35	36	37	38	39	40	41	42	43	44	45	46	47	48	49
BIOMASS = (EX)BIOMASS	0	0	0	8956	4478	17912	4478	0	0	0	0	0	0	6717	4478	2239	11195	2239	0	17912	0	0	0	11195	0	0	0	0	0	8956	11195	49258	4478	0	0	0	0	35824	2239	58214	4478	0	0	0	0	0	0	8956	4478
AC = (EX)AC	0	-2	-4	4318	-2159	0	0	1	0	-4	-5	-1	0	5798	-1002	-2899	0	0	-4	0	-4	-5	0	0	2	-22	-2	0	0	7078	-10617	0	0	6	-26	-6	0	35790	-3579	0	0	-2	0	-18	-18	-22	0	178	0
BUTY = (EX)BUTY	0	-2	0	0	0	0	-2159	0	-1	-1	0	0	0	0	-7301	0	0	-2899	0	0	-1	0	0	0	0	0	0	0	-1	0	0	0	-3539	0	0	0	0	0	0	0	-5965	4	1	4	4	0	0	8280	4318
ACT = (EX)ACT	0	2	2	0	2159	4318	2159	0	1	3	3	1	1	0	7301	2899	5798	2899	2	4318	3	3	1	5798	0	12	2	1	1	0	10617	21234	3539	0	16	6	3	0	3579	35790	5965	0	0	8	8	12	1	0	0
ET = (EX)ET	2	0	2	16560	10439	37438	8280	1	0	0	1	1	2	7301	0	3400	14101	501	2	37438	0	1	2	14101	0	0	0	0	0	0	0	0	0	0	0	0	0	0	0	0	0	0	0	0	0	0	0	0	0
BUT = (EX)BUT	0	2	0	0	0	0	2159	0	1	1	0	0	0	0	7301	0	0	2899	0	0	1	0	0	0	4	4	4	4	3	5520	10439	37438	6299	2	2	2	2	14602	1360	28202	6299	0	1	0	0	4	4	0	0
External Glucose	1	1	1	13261	7710	28681	7710	1	1	1	1	1	2	8666	8211	3855	16376	3855	1	28681	1	1	2	16376	5	5	5	5	3	11881	19275	74193	7710	5	5	5	5	43785	3855	82335	7710	3	2	3	3	5	5	11191	5729
	A'x=b'
[truncated: 20 more columns]

## Sheet: EM Reactions
Matrix of Elementary modes (EM)
name\EMs	1	2	3	4	5	6	7	8	9	10	11	12	13	14	15	16	17	18	19	20	21	22	23	24	25	26	27	28	29	30	31	32	33	34	35	36	37	38	39	40	41	42	43	44	45	46	47	48	49
AD1	2	0	0	0	0	0	0	3	2	0	0	2	5	0	0	0	0	0	0	0	0	0	5	0	12	0	10	11	6	0	0	0	0	16	0	10	13	0	0	0	0	8	5	0	0	0	11	0	356
APP1	0	2	2	0	2159	4318	2159	0	1	3	3	1	1	0	7301	2899	5798	2899	2	4318	3	3	1	5798	4	16	6	5	3	5520	21056	58672	6299	2	18	8	5	14602	4939	63992	6299	4	2	12	12	16	5	8280	4318
APP2	0	0	0	0	0	0	0	0	0	0	0	0	0	0	0	0	0	0	0	0	0	0	0	0	4	4	4	4	2	5520	10439	37438	2760	2	2	2	2	14602	1360	28202	334	4	2	4	4	4	4	8280	4318
APP3	0	0	0	0	0	0	0	0	0	0	0	0	0	0	0	0	0	0	0	0	0	0	0	0	4	4	4	4	2	5520	10439	37438	2760	2	2	2	2	14602	1360	28202	334	4	2	4	4	4	4	8280	4318
APP4	0	0	0	0	0	0	0	0	0	0	0	0	0	0	0	0	0	0	0	0	0	0	0	0	4	4	4	4	2	5520	10439	37438	2760	2	2	2	2	14602	1360	28202	334	4	2	4	4	4	4	8280	4318
APP6	0	-2	-2	4318	0	4318	0	1	0	-2	-2	0	1	5798	-1002	0	5798	0	-4	0	-4	-5	0	0	2	-10	0	1	0	7078	0	21234	0	6	-10	0	3	35790	0	35790	0	-2	0	-10	-18	-22	0	178	0
APP7	0	-2	-2	4318	0	4318	0	1	0	-2	-2	0	1	5798	-1002	0	5798	0	-4	0	-4	-5	0	0	2	-10	0	1	0	7078	0	21234	0	6	-10	0	3	35790	0	35790	0	-2	0	-10	-18	-22	0	178	0
APP8	0	0	0	0	0	0	0	0	0	0	0	0	0	0	0	0	0	0	2	4318	2	3	1	5798	0	0	0	0	0	0	0	0	0	0	0	0	0	0	0	0	0	4	1	4	12	12	1	8280	4318
APP9	0	0	0	0	0	0	0	0	0	0	0	0	0	0	0	0	0	0	2	4318	2	3	1	5798	0	0	0	0	0	0	0	0	0	0	0	0	0	0	0	0	0	4	1	4	12	12	1	8280	4318
BP1	0	0	0	4	2	8	2	0	0	0	0	0	0	3	2	1	5	1	0	8	0	0	0	5	0	0	0	0	0	4	5	22	2	0	0	0	0	16	1	26	2	0	0	0	0	0	0	4	2
EM1	0	0	0	0	0	0	0	2	2	2	2	2	4	5119	8280	3639	12397	3639	0	0	2	2	4	12397	0	0	0	0	0	0	0	0	0	10	10	10	10	22434	3639	58824	7278	0	0	0	0	0	0	0	0
*EM10	0	0	0	8956	4478	17912	4478	0	0	0	0	0	0	6717	4478	2239	11195	2239	0	17912	0	0	0	11195	0	0	0	0	0	8956	11195	49258	4478	0	0	0	0	35824	2239	58214	4478	0	0	0	0	0	0	8956	4478
EM3	2	4	4	28854	18745	66344	18745	2	3	5	5	3	5	19081	24889	11192	41465	11192	4	66344	5	5	5	41465	10	22	12	11	7	26094	52082	182446	20125	10	26	16	13	96898	11872	215618	22551	6	4	14	14	22	11	24714	12624
EM4	0	-2	-4	4318	-2159	0	0	1	0	-4	-5	-1	0	5798	-1002	-2899	0	0	-4	0	-4	-5	0	0	2	-22	-2	0	0	7078	-10617	0	0	6	-26	-6	0	35790	-3579	0	0	-2	0	-18	-18	-22	0	178	0
EM5	0	-2	0	0	0	0	-2159	0	-1	-1	0	0	0	0	-7301	0	0	-2899	0	0	-1	0	0	0	0	0	0	0	-1	0	0	0	-3539	0	0	0	0	0	0	0	-5965	4	1	4	4	0	0	8280	4318
EM6	0	2	2	0	2159	4318	2159	0	1	3	3	1	1	0	7301	2899	5798	2899	2	4318	3	3	1	5798	0	12	2	1	1	0	10617	21234	3539	0	16	6	3	0	3579	35790	5965	0	0	8	8	12	1	0	0
EM7	2	0	2	16560	10439	37438	8280	1	0	0	1	1	2	7301	0	3400	14101	501	2	37438	0	1	2	14101	0	0	0	0	0	0	0	0	0	0	0	0	0	0	0	0	0	0	0	0	0	0	0	0	0
EM8	0	2	0	0	0	0	2159	0	1	1	0	0	0	0	7301	0	0	2899	0	0	1	0	0	0	4	4	4	4	3	5520	10439	37438	6299	2	2	2	2	14602	1360	28202	6299	0	1	0	0	4	4	0	0
EM9	2	2	2	25358	14838	55034	14838	2	2	2	2	2	4	16459	15840	7419	31297	7419	2	55034	2	2	4	31297	10	10	10	10	6	22598	37095	141984	14838	10	10	10	10	82914	7419	157104	14838	6	4	6	6	10	10	21218	10876
EMP1	1	1	1	13261	7710	28681	7710	1	1	1	1	1	2	8666	8211	3855	16376	3855	1	28681	1	1	2	16376	5	5	5	5	3	11881	19275	74193	7710	5	5	5	5	43785	3855	82335	7710	3	2	3	3	5	5	11191	5729
EMP2	1	1	1	13261	7710	28681	7710	1	1	1	1	1	2	8666	8211	3855	16376	3855	1	28681	1	1	2	16376	5	5	5	5	3	11881	19275	74193	7710	5	5	5	5	43785	3855	82335	7710	3	2	3	3	5	5	11191	5729
EMP3	1	1	1	12925	7542	28009	7542	1	1	1	1	1	2	8414	8043	3771	15956	3771	1	28009	1	1	2	15956	5	5	5	5	3	11545	18855	72345	7542	5	5	5	5	42441	3771	80151	7542	3	2	3	3	5	5	10855	5561
EMP4	1	1	1	12925	7542	28009	7542	1	1	1	1	1	2	8414	8043	3771	15956	3771	1	28009	1	1	2	15956	5	5	5	5	3	11545	18855	72345	7542	5	5	5	5	42441	3771	80151	7542	3	2	3	3	5	5	10855	5561
EMP5	2	2	2	25682	15000	55682	15000	2	2	2	2	2	4	16702	16002	7500	31702	7500	2	55682	2	2	4	31702	10	10	10	10	6	22922	37500	143766	15000	10	10	10	10	84210	7500	159210	15000	6	4	6	6	10	10	21542	11038
EMP6	2	2	2	25358	14838	55034	14838	2	2	2	2	2	4	16459	15840	7419	31297	7419	2	55034	2	2	4	31297	10	10	10	10	6	22598	37095	141984	14838	10	10	10	10	82914	7419	157104	14838	6	4	6	6	10	10	21218	10876
EMP7	1	1	1	11249	6704	24657	6704	1	1	1	1	1	2	7157	7205	3352	13861	3352	1	24657	1	1	2	13861	5	5	5	5	3	9869	16760	63127	6704	5	5	5	5	35737	3352	69257	6704	3	2	3	3	5	5	9179	4723
HPP1	2	2	2	22238	13278	48794	13278	2	2	2	2	2	4	14119	14280	6639	27397	6639	2	48794	2	2	4	27397	10	10	10	10	6	19478	33195	124824	13278	10	10	10	10	70434	6639	136824	13278	6	4	6	6	10	10	18098	9316
HPP2	0	0	0	12000	6000	24000	6000	0	0	0	0	0	0	9000	6000	3000	15000	3000	0	24000	0	0	0	15000	0	0	0	0	0	12000	15000	66000	6000	0	0	0	0	48000	3000	78000	6000	0	0	0	0	0	0	12000	6000
HPP3	2	2	2	10238	7278	24794	7278	0	0	0	0	0	0	0	0	0	0	0	2	24794	0	0	0	0	10	10	10	10	6	7478	18195	58824	7278	0	0	0	0	0	0	0	0	6	4	6	6	10	10	6098	3316
HPP4	0	0	0	0	0	0	0	2	2	2	2	2	4	5119	8280	3639	12397	3639	0	0	2	2	4	12397	0	0	0	0	0	0	0	0	0	10	10	10	10	22434	3639	58824	7278	0	0	0	0	0	0	0	0
PPP2	0	0	0	336	168	672	168	0	0	0	0	0	0	252	168	84	420	84	0	672	0	0	0	420	0	0	0	0	0	336	420	1848	168	0	0	0	0	1344	84	2184	168	0	0	0	0	0	0	336	168
PPP3	0	0	0	-336	-168	-672	-168	0	0	0	0	0	0	-252	-168	-84	-420	-84	0	-672	0	0	0	-420	0	0	0	0	0	-336	-420	-1848	-168	0	0	0	0	-1344	-84	-2184	-168	0	0	0	0	0	0	-336	-168
PPP4	0	0	0	-168	-84	-336	-84	0	0	0	0	0	0	-126	-84	-42	-210	-42	0	-336	0	0	0	-210	0	0	0	0	0	-168	-210	-924	-84	0	0	0	0	-672	-42	-1092	-84	0	0	0	0	0	0	-168	-84
PPP5	0	0	0	-168	-84	-336	-84	0	0	0	0	0	0	-126	-84	-42	-210	-42	0	-336	0	0	0	-210	0	0	0	0	0	-168	-210	-924	-84	0	0	0	0	-672	-42	-1092	-84	0	0	0	0	0	0	-168	-84
PPP6	0	0	0	-168	-84	-336	-84	0	0	0	0	0	0	-126	-84	-42	-210	-42	0	-336	0	0	0	-210	0	0	0	0	0	-168	-210	-924	-84	0	0	0	0	-672	-42	-1092	-84	0	0	0	0	0	0	-168	-84
SPP1	2	0	2	16560	10439	37438	8280	1	0	0	1	1	2	7301	0	3400	14101	501	2	37438	0	1	2	14101	0	0	0	0	0	0	0	0	0	0	0	0	0	0	0	0	0	0	0	0	0	0	0	0	0
SPP2	2	0	2	16560	10439	37438	8280	1	0	0	1	1	2	7301	0	3400	14101	501	2	37438	0	1	2	14101	0	0	0	0	0	0	0	0	0	0	0	0	0	0	0	0	0	0	0	0	0	0	0	0	0
SPP3	0	0	2	0	2159	4318	0	0	0	2	3	1	1	0	0	2899	5798	0	0	0	0	0	0	0	0	12	2	1	0	0	10617	21234	0	0	16	6	3	0	3579	35790	0	0	0	8	0	0	0	0	0
SPP4	0	2	0	0	0	0	2159	0	1	1	0	0	0	0	7301	0	0	2899	2	4318	3	3	1	5798	0	0	0	0	1	0	0	0	3539	0	0	0	0	0	0	0	5965	0	0	0	8	12	1	0	0
SPP5	0	2	2	0	2159	4318	2159	0	1	3	3	1	1	0	7301	2899	5798	2899	2	4318	3	3	1	5798	0	12	2	1	1	0	10617	21234	3539	0	16	6	3	0	3579	35790	5965	0	0	8	8	12	1	0	0
SPP6	0	2	0	0	0	0	2159	0	1	1	0	0	0	0	7301	0	0	2899	0	0	1	0	0	0	4	4	4	4	3	5520	10439	37438	6299	2	2	2	2	14602	1360	28202	6299	0	1	0	0	4	4	0	0
SPP7	0	2	0	0	0	0	2159	0	1	1	0	0	0	0	7301	0	0	2899	0	0	1	0	0	0	4	4	4	4	3	5520	10439	37438	6299	2	2	2	2	14602	1360	28202	6299	0	1	0	0	4	4	0	0
Description of matrix (EM):
Rows – biochemical reactions of the original neywork; All reactions can be seen in Table 2S in supplementary file 01 of paper according to their respective names.
Columns – EMs
Elements of S matrix are the corresponding coefficients.
Flux calculation of the biochemical reactions of the original metabolic network:
Flux distribution in original network (fluxes of biochemical reactions) can be calculated from above matrix (EM) while fluxes of the elementary modes are know and the fluxes of elementary modes can be evaluated using 'linprog' at MATLAB platform through linear programming
[truncated: 20 more columns]
