# Supplementary material for: Elementary mode analysis reveals that Clostridium acetobutylicum modulates its metabolic strategy under external stress
Source: Royal Society of Chemistry journal article supplement (doi:10.1039/c4mb00126e), 2014-05-14
Supplement: c4mb00126e3.xlsx [file c4mb00126e3.xlsx]

## Sheet: Initial pH 6.8
Flux variability analysis
Uncontrolled pH 6.8 (Acidogenesis)																															Uncontrolled pH 6.8 (Solventogenesis)
*Biomass (Objective Function)										Acetic acid										Butyric acid (Objective Function)											*Biomass (Objective function)										Acetic acid
Original Network			Elementary Modes				External Metabolites			Original Network			Elementary Modes				External Metabolites			Original Network			Elementary Modes				External Metabolites				Original Network			Elementary Modes				External Metabolites			Original Network			Elementary Modes				External Metabolites
	Max	Min		Max	Min	Max-Min		Max	Min		Max	Min		Max	Min	Max-Min		Max	Min		Max	Min		Max	Min	Max-Min						Max	Min		Max	Min	Max-Min		Max	Min		Max	Min		Max	Min	Max-Min		Max
Reaction	Flux (mM/Lh)	Flux (mM/Lh)	EM_MAIN	Flux (mM/Lh)	Flux (mM/Lh)		EXTERNAL METABOLITE	Accumulation rate (mM/h)	Accumulation rate (mM/h)	Reaction	Flux (mM/Lh)	Flux (mM/Lh)	EM_MAIN	Flux (mM/Lh)	Flux (mM/Lh)		EXTERNAL METABOLITE	Accumulation rate (mM/h)	Accumulation rate (mM/h)	Reaction	Flux (mM/Lh)	Flux (mM/Lh)	EM_MAIN	Flux (mM/Lh)	Flux (mM/Lh)		EXTERNAL METABOLITE	Accumulation rate (mM/h)	Accumulation rate (mM/h)		Reaction	Flux (mM/Lh)	Flux (mM/Lh)	EM_MAIN	Flux (mM/Lh)	Flux (mM/Lh)		EXTERNAL METABOLITE	Accumulation rate (mM/h)	Accumulation rate (mM/h)	Reaction	Flux (mM/Lh)	Flux (mM/Lh)	EM_MAIN	Flux (mM/Lh)	Flux (mM/Lh)		EXTERNAL METABOLITE	Accumulation rate (mM/h)
AD1	60.3619	60.3619	EM1	0.000714316	0.00074513	-3.08137e-05	H2	64.8414	64.8414	AD1	60.3619	60.3619	EM1	0.000791008	0.000864791	-7.37834e-05	H2	64.8414	64.8414	AD1	60.3619	60.3619	EM1	0.000338232	0.00153656	-0.00119832	H2	64.8414	64.8414		AD1	227.3	227.3	EM1	0	0	0	H2	107.65	107.65	AD1	227.3	227.3	EM1	2.76e-13	0	2.76e-13	H2	107.65
APP1	60.9974	60.9974	EM2	0.00108029	0.00104173	3.85528e-05	*Biomass	68.4	68.4	APP1	60.9974	60.9974	EM2	0.00105156	0.000863813	0.000187752	*Biomass	68.4	68.4	APP1	60.9974	60.9974	EM2	0.00123665	0.000434161	0.000802492	*Biomass	68.4	68.4		APP1	110.75	110.75	EM2	0	0	0	*Biomass	0	0	APP1	110.75	110.75	EM2	1.37e-13	0	1.37e-13	*Biomass	0
APP2	60.9974	60.9974	EM3	0.772388	0.872407	-0.100019	CO2	217.81	217.81	APP2	60.9974	60.9974	EM3	0.722944	1.27949	-0.556541	CO2	217.81	217.81	APP2	60.9974	60.9974	EM3	0.819751	1.18262	-0.362869	CO2	217.81	217.81		APP2	56.15	56.15	EM3	3.52659	3.58136	-0.0547757	CO2	254.6	254.6	APP2	56.15	56.15	EM3	3.57477	3.20304	0.371727	CO2	254.6
APP3	60.9974	60.9974	EM4	5.63724	5.60175	0.035489	Acetate	34.9	34.9	APP3	60.9974	60.9974	EM4	5.6533	5.43789	0.215416	Acetate	34.9	34.9	APP3	60.9974	60.9974	EM4	5.60359	5.37779	0.225799	Acetate	34.9	34.9		APP3	56.15	56.15	EM4	1.17262	1.25209	-0.0794733	Acetate	-22.5	-22.5	APP3	56.15	56.15	EM4	1.15505	1.23192	-0.0768656	Acetate	-22.5
APP4	60.9974	60.9974	EM5	0.00247996	0.00248922	-9.25836e-06	Butyrate	60.9974	60.9974	APP4	60.9974	60.9974	EM5	0.00247611	0.00253645	-6.03439e-05	Butyrate	60.9974	60.9974	APP4	60.9974	60.9974	EM5	0.00249263	0.00257396	-8.13321e-05	Butyrate	60.9974	60.9974		APP4	56.15	56.15	EM5	0	0	0	Butyrate	-4.8	-4.8	APP4	56.15	56.15	EM5	5.5e-14	0	5.5e-14	Butyrate	-4.8
APP6	34.9	34.9	EM6	3e-15	3e-15	0	Acetone	0	0	APP6	34.9	34.9	EM6	3e-15	9.96092e-09	-9.96092e-09	Acetone	0	0	APP6	34.9	34.9	EM6	3e-15	6.56612e-09	-6.56612e-09	Acetone	0	0		APP6	-3.24264	-3.24002	EM6	0.163434	0.239406	-0.0759715	Acetone	54.6	54.6	APP6	-3.27856	-3.14315	EM6	0.145888	0.109513	0.0363747	Acetone	54.6
APP7	34.9	34.9	EM7	0	1e-15	-1e-15	Ethanol	0	0	APP7	34.9	34.9	EM7	0	1.65828e-09	-1.65828e-09	Ethanol	0	0	APP7	34.9	34.9	EM7	1e-15	1.57913e-09	-1.57913e-09	Ethanol	0	0		APP7	-3.24264	-3.24002	EM7	0.0360596	0.0388918	-0.00283221	Ethanol	1	1	APP7	-3.27856	-3.14315	EM7	0.0359507	0.0304364	0.00551429	Ethanol	1
APP8	60.9974	60.9974	EM8	0	1e-15	-1e-15	Butanol	0	0	APP8	60.9974	60.9974	EM8	0	1.48064e-09	-1.48064e-09	Butanol	0	0	APP8	60.9974	60.9974	EM8	1e-15	1.35533e-09	-1.35533e-09	Butanol	0	0		APP8	30.5426	30.54	EM8	5.41695	4.63169	0.78526	Butanol	60.95	60.95	APP8	30.5786	30.4431	EM8	5.72388	5.37027	0.35361	Butanol	60.95
APP9	60.9974	60.9974	EM9	1e-15	1e-15	0	H2O	191.11	191.11	APP9	60.9974	60.9974	EM9	1e-15	2.70763e-09	-2.70763e-09	H2O	191.11	191.11	APP9	60.9974	60.9974	EM9	1e-15	3.4707e-09	-3.47069e-09	H2O	191.11	191.11		APP9	30.5426	30.54	EM9	0.0541221	0.0387388	0.0153833	H2O	200	200	APP9	30.5786	30.4431	EM9	0.0560249	0.0654931	-0.00946815	H2O	200
BP1	0.030549	0.030549	EM10	1e-15	1e-15	0	Glucose	100	100	BP1	0.030549	0.030549	EM10	1e-15	3.08055e-09	-3.08055e-09	Glucose	100	100	BP1	0.030549	0.030549	EM10	1e-15	2.37636e-09	-2.37636e-09	Glucose	100	100		BP1	0	0	EM10	9.58689	11.2577	-1.67084	Glucose	100	100	BP1	0	0	EM10	9.07121	10.9997	-1.92846	Glucose	100
EM1	64.8414	64.8414	EM11	0	0	0				EM1	64.8414	64.8414	EM11	0	1.33303e-09	-1.33303e-09				EM1	64.8414	64.8414	EM11	1e-15	1.25688e-09	-1.25688e-09					EM1	107.65	107.65	EM11	0.0484684	0.0435793	0.00488911				EM1	107.65	107.65	EM11	0.0478061	0.0436699	0.0041362
EM10	68.4	68.4	EM12	1e-15	1e-15	0	Biomass is an objective function for all calculation in this sheet with a .			EM10	68.4	68.4	EM12	1e-15	3.28182e-09	-3.28182e-09				EM10	68.4	68.4	EM12	2e-15	2.19039e-09	-2.19039e-09					EM10	0	0	EM12	0.127678	0.0926146	0.0350637				EM10	0	0	EM12	0.131996	0.176138	-0.0441419
EM3	217.81	217.81	EM13	0	0	0	fixed flux value.			EM3	217.81	217.81	EM13	0	1.25856e-09	-1.25856e-09				EM3	217.81	217.81	EM13	1e-15	1.21825e-09	-1.21825e-09					EM3	254.6	254.6	EM13	0.687056	0.726285	-0.0392299				EM3	254.6	254.6	EM13	0.692112	0.429864	0.262248
EM4	34.9	34.9	EM14	0	1e-15	-1e-15				EM4	34.9	34.9	EM14	0	1.65828e-09	-1.65828e-09				EM4	34.9	34.9	EM14	1e-15	1.57913e-09	-1.57913e-09					EM4	-22.5	-22.5	EM14	0.0360596	0.0388918	-0.00283221				EM4	-22.5	-22.5	EM14	0.0359507	0.0304364	0.00551429
EM5	60.9974	60.9974	EM15	1e-15	1e-15	0	Max - maximizing the flux of a specific metabolite when biomass is an objective			EM5	60.9974	60.9974	EM15	1e-15	2.70763e-09	-2.70763e-09				EM5	60.9974	60.9974	EM15	1e-15	3.4707e-09	-3.47069e-09					EM5	-4.8	-4.8	EM15	0.0541221	0.0387388	0.0153833				EM5	-4.8	-4.8	EM15	0.0560249	0.0654931	-0.00946815
EM6	0	0	EM16	0	0	0	function with fixed flux value.			EM6	0	0	EM16	0	1.33303e-09	-1.33303e-09				EM6	0	0	EM16	1e-15	1.25688e-09	-1.25688e-09					EM6	54.6	54.6	EM16	0.0484684	0.0435793	0.00488911				EM6	54.6	54.6	EM16	0.0478061	0.0436699	0.0041362
EM7	0	0	EM17	0	0	0				EM7	0	0	EM17	0	1.25856e-09	-1.25856e-09				EM7	0	0	EM17	1e-15	1.21825e-09	-1.21825e-09					EM7	1	1	EM17	0.687056	0.726285	-0.0392299				EM7	1	1	EM17	0.692112	0.429864	0.262248
EM8	0	0	EM18	1e-15	1e-15	0	Min - minimizing the flux of a specific metabolite when biomass is an objective			EM8	0	0	EM18	1e-15	1.50132e-09	-1.50132e-09				EM8	0	0	EM18	1e-15	4.58792e-10	-4.58791e-10					EM8	60.95	60.95	EM18	0.829444	0.753243	0.0762009				EM8	60.95	60.95	EM18	0.848378	0.696911	0.151467
EM9	191.11	191.11	EM19	1e-15	1e-15	0	function with fixed flux value.			EM9	191.11	191.11	EM19	1e-15	1.74264e-09	-1.74264e-09				EM9	191.11	191.11	EM19	1e-15	2.74897e-10	-2.74896e-10					EM9	200	200	EM19	1.93687	1.48444	0.452432				EM9	200	200	EM19	1.95885	0.833592	1.12525
EMP1	100	100	EM20	0	0	0				EMP1	100	100	EM20	0	3.09272e-10	-3.09272e-10				EMP1	100	100	EM20	0	2.81673e-10	-2.81673e-10					EMP1	100	100	EM20	0.123879	0.128204	-0.00432539				EMP1	100	100	EM20	0.124483	0.0790182	0.0454644
EMP2	100	100	EM21	0	0	0	Observation:			EMP2	100	100	EM21	0	1.05852e-09	-1.05852e-09				EMP2	100	100	EM21	1e-15	3.18347e-10	-3.18346e-10					EMP2	100	100	EM21	0.810868	0.725982	0.084886				EMP2	100	100	EM21	0.829741	0.669004	0.160737
EMP3	97.4339	97.4339	EM22	0	0	0	Flux distribution of original network is unique and there is variation in			EMP3	97.4339	97.4339	EM22	0	1.08056e-09	-1.08056e-09				EMP3	97.4339	97.4339	EM22	1e-15	1.4566e-09	-1.4566e-09					EMP3	100	100	EM22	0.873335	0.926795	-0.0534597				EMP3	100	100	EM22	0.850425	0.906284	-0.0558591
EMP4	97.4339	97.4339	EM23	0	0	0	sets of flux values in EMs (comparison is based on maximizing and			EMP4	97.4339	97.4339	EM23	0	2.61132e-10	-2.61132e-10				EMP4	97.4339	97.4339	EM23	0	2.41303e-10	-2.41303e-10					EMP4	100	100	EM23	0.0995188	0.101432	-0.00191275				EMP4	100	100	EM23	0.0973854	0.109792	-0.012407
EMP5	193.585	193.585	EM24	0	0	0	minimizing a specific metabolite when flux value of biomass was fixed)			EMP5	193.585	193.585	EM24	0	6.20331e-10	-6.20331e-10				EMP5	193.585	193.585	EM24	0	3.94887e-10	-3.94887e-10					EMP5	200	200	EM24	0.682659	0.680799	0.00185966				EMP5	200	200	EM24	0.687316	0.706103	-0.0187871
EMP6	191.11	191.11	EM25	1e-15	1e-15	0				EMP6	191.11	191.11	EM25	1e-15	1.50132e-09	-1.50132e-09				EMP6	191.11	191.11	EM25	1e-15	4.58792e-10	-4.58791e-10					EMP6	200	200	EM25	0.829444	0.753243	0.0762009				EMP6	200	200	EM25	0.848378	0.696911	0.151467
EMP7	84.6337	84.6337	EM26	0	0	0	Note: This methodology is adapted from Mahadevan and Schilling_2003 to			EMP7	84.6337	84.6337	EM26	0	3.09272e-10	-3.09272e-10				EMP7	84.6337	84.6337	EM26	0	2.81673e-10	-2.81673e-10					EMP7	100	100	EM26	0.123879	0.128204	-0.00432539				EMP7	100	100	EM26	0.124483	0.0790182	0.0454644
HPP1	167.282	167.282	EM27	0	0	0	calculate the flux variability wherein the same optimal objective.			HPP1	167.282	167.282	EM27	0	1.08056e-09	-1.08056e-09				HPP1	167.282	167.282	EM27	1e-15	1.4566e-09	-1.4566e-09					HPP1	200	200	EM27	0.873335	0.926795	-0.0534597				HPP1	200	200	EM27	0.850425	0.906284	-0.0558591
HPP2	91.6481	91.6481	EM28	0	0	0				HPP2	91.6481	91.6481	EM28	0	2.61132e-10	-2.61132e-10				HPP2	91.6481	91.6481	EM28	0	2.41303e-10	-2.41303e-10					HPP2	0	0	EM28	0.0995188	0.101432	-0.00191275				HPP2	0	0	EM28	0.0973854	0.109792	-0.012407
HPP3	10.7922	10.7922	EM29	0	0	0				HPP3	10.7922	10.7922	EM29	0	1.082e-12	-1.082e-12				HPP3	10.7922	10.7922	EM29	0	9.13e-13	-9.13e-13					HPP3	92.35	92.35	EM29	0	0	0				HPP3	92.35	92.35	EM29	8e-15	0	8e-15
HPP4	64.8414	64.8414	EM30	0	0	0				HPP4	64.8414	64.8414	EM30	0	3.09e-13	-3.09e-13				HPP4	64.8414	64.8414	EM30	0	2.8e-13	-2.8e-13					HPP4	107.65	107.65	EM30	0	0	0				HPP4	107.65	107.65	EM30	7e-15	0	7e-15
PPP2	2.56615	2.56615	EM31	5e-15	5e-15	0				PPP2	2.56615	2.56615	EM31	5e-15	1.49981e-08	-1.49981e-08				PPP2	2.56615	2.56615	EM31	7e-15	2.06886e-08	-2.06886e-08					PPP2	0	0	EM31	0.0877895	0.0308925	0.056897				PPP2	0	0	EM31	0.112713	0.133777	-0.0210645
PPP3	-2.56615	-2.56615	EM32	0	0	0				PPP3	-2.56615	-2.56615	EM32	0	2.534e-12	-2.534e-12				PPP3	-2.56615	-2.56615	EM32	0	2.983e-12	-2.983e-12					PPP3	0	0	EM32	0	0	0				PPP3	0	0	EM32	9.6e-14	0	9.6e-14
PPP4	-1.28307	-1.28307	EM33	0	0	0				PPP4	-1.28307	-1.28307	EM33	0	4.55e-13	-4.55e-13				PPP4	-1.28307	-1.28307	EM33	0	4.86e-13	-4.86e-13					PPP4	0	0	EM33	0	0	0				PPP4	0	0	EM33	5.9e-14	0	5.9e-14
PPP5	-1.28307	-1.28307	EM34	0	0	0				PPP5	-1.28307	-1.28307	EM34	0	3.09e-13	-3.09e-13				PPP5	-1.28307	-1.28307	EM34	0	2.8e-13	-2.8e-13					PPP5	0	0	EM34	0	0	0				PPP5	0	0	EM34	7e-15	0	7e-15
PPP6	-1.28307	-1.28307	EM35	0	0	0				PPP6	-1.28307	-1.28307	EM35	0	4.55e-13	-4.55e-13				PPP6	-1.28307	-1.28307	EM35	0	4.86e-13	-4.86e-13					PPP6	0	0	EM35	0	0	0				PPP6	0	0	EM35	5.9e-14	0	5.9e-14
SPP1	0	0	EM36	1e-15	1e-15	0				SPP1	0	0	EM36	1e-15	2.56972e-09	-2.56972e-09				SPP1	0	0	EM36	1e-15	1.70462e-10	-1.70461e-10					SPP1	1	1	EM36	2.35885	3.09538	-0.736536				SPP1	1	1	EM36	2.18189	3.71632	-1.53443
SPP2	0	0	EM37	0	0	0				SPP2	0	0	EM37	0	2.496e-12	-2.496e-12				SPP2	0	0	EM37	0	3.642e-12	-3.642e-12					SPP2	1	1	EM37	0	0	0				SPP2	1	1	EM37	1.35e-13	0	1.35e-13
SPP3	0	0	EM38	0	0	0				SPP3	0	0	EM38	0	1.11e-13	-1.11e-13				SPP3	0	0	EM38	0	1.08e-13	-1.08e-13					SPP3	19.2574	19.26	EM38	0	0	0				SPP3	19.2214	19.3569	EM38	2.5e-14	0	2.5e-14
SPP4	0	0	EM39	2e-15	2e-15	0				SPP4	0	0	EM39	1e-15	4.0083e-09	-4.0083e-09				SPP4	0	0	EM39	2e-15	7.91145e-09	-7.91145e-09					SPP4	35.3426	35.34	EM39	2.92492	2.46419	0.460732				SPP4	35.3786	35.2431	EM39	3.09116	2.51309	0.578074
SPP5	0	0	EM40	0	0	0				SPP5	0	0	EM40	0	1.399e-12	-1.399e-12				SPP5	0	0	EM40	0	2.31e-12	-2.31e-12					SPP5	54.6	54.6	EM40	0	0	0				SPP5	54.6	54.6	EM40	3.4e-14	0	3.4e-14
SPP6	0	0	EM41	0	0	0				SPP6	0	0	EM41	0	9.2e-14	-9.2e-14				SPP6	0	0	EM41	0	1.23e-13	-1.23e-13					SPP6	60.95	60.95	EM41	0	0	0				SPP6	60.95	60.95	EM41	2.1e-14	0	2.1e-14
SPP7	0	0	EM42	4e-15	5e-15	-1e-15				SPP7	0	0	EM42	5e-15	1.50091e-08	-1.50091e-08				SPP7	0	0	EM42	6e-15	1.1075e-08	-1.1075e-08					SPP7	60.95	60.95	EM42	1.93247	1.78309	0.149387				SPP7	60.95	60.95	EM42	1.99267	1.59787	0.394803
			EM43	0	0	0							EM43	0	2.319e-12	-2.319e-12							EM43	0	9.6e-14	-9.6e-14								EM43	0	0	0							EM43	3e-14	0	3e-14
			EM44	0	0	0							EM44	0	2.319e-12	-2.319e-12							EM44	0	9.6e-14	-9.6e-14								EM44	0	0	0							EM44	3e-14	0	3e-14
			EM45	0	0	0							EM45	0	1.11e-13	-1.11e-13							EM45	0	1.08e-13	-1.08e-13								EM45	0	0	0							EM45	2.5e-14	0	2.5e-14
			EM46	1e-15	1e-15	0							EM46	1e-15	4.48072e-09	-4.48072e-09							EM46	2e-15	5.57826e-09	-5.57826e-09								EM46	0.959242	0.95517	0.00407244							EM46	0.947832	0.969522	-0.0216903
			EM47	1e-15	1e-15	0							EM47	1e-15	4.48072e-09	-4.48072e-09							EM47	2e-15	5.57826e-09	-5.57826e-09								EM47	0.959242	0.95517	0.00407244							EM47	0.947832	0.969522	-0.0216903
			EM48	0	0	0							EM48	0	4.72e-13	-4.72e-13							EM48	0	5.79e-13	-5.79e-13								EM48	0	0	0							EM48	3e-14	0	3e-14
			EM49	0	0	0							EM49	0	4.72e-13	-4.72e-13							EM49	0	5.79e-13	-5.79e-13								EM49	0	0	0							EM49	3e-14	0	3e-14
			EM50	0	0	0							EM50	0	9.2e-14	-9.2e-14							EM50	0	1.23e-13	-1.23e-13								EM50	0	0	0							EM50	2.1e-14	0	2.1e-14
			EM51	0	0	0							EM51	0	8.48e-13	-8.48e-13							EM51	0	8.3e-13	-8.3e-13								EM51	0	0	0							EM51	4.1e-14	0	4.1e-14
			EM52	0	0	0							EM52	0	1.121e-12	-1.121e-12							EM52	0	1.184e-12	-1.184e-12								EM52	0	0	0							EM52	3.05e-13	0	3.05e-13
			EM53	0	0	0							EM53	0	2.75e-13	-2.75e-13							EM53	0	2.58e-13	-2.58e-13								EM53	0	0	0							EM53	1.1e-13	0	1.1e-13
			EM54	0	0	0							EM54	0	1.036e-12	-1.036e-12							EM54	0	1.064e-12	-1.064e-12								EM54	0	0	0							EM54	5.48e-13	0	5.48e-13
			EM55	0.177261	0.182744	-0.00548293							EM55	0.172307	0.229591	-0.0572836							EM55	0.218295	0.311143	-0.0928478								EM55	0.96055	0.882255	0.0782947							EM55	0.98823	0.833115	0.155115
			EM56	0	0	0							EM56	0	5.84181e-10	-5.84181e-10							EM56	0	4.84175e-10	-4.84175e-10								EM56	0.136699	0.141315	-0.00461585							EM56	0.138771	0.191841	-0.0530707
			EM57	0	0	0							EM57	0	5.84181e-10	-5.84181e-10							EM57	0	4.84175e-10	-4.84175e-10								EM57	0.136699	0.141315	-0.00461585							EM57	0.138771	0.191841	-0.0530707
			EM58	0	0	0							EM58	0	1.53e-13	-1.53e-13							EM58	0	7.942e-12	-7.942e-12								EM58	0	0	0							EM58	5.5e-14	0	5.5e-14
			EM59	0	0	0							EM59	0	4.52888e-10	-4.52888e-10							EM59	0	4.03398e-10	-4.03398e-10								EM59	0.138399	0.140141	-0.00174119							EM59	0.135135	0.206761	-0.0716264
			EM60	1e-15	1e-15	0							EM60	1e-15	2.30196e-09	-2.30196e-09							EM60	1e-15	2.48782e-09	-2.48782e-09								EM60	0.900554	0.874349	0.0262045							EM60	0.894771	0.898228	-0.00345749
			EM61	0	0	0							EM61	0	4.52888e-10	-4.52888e-10							EM61	0	4.03398e-10	-4.03398e-10								EM61	0.138399	0.140141	-0.00174119							EM61	0.135135	0.206761	-0.0716264
			EM62	0	0	0							EM62	0	3.759e-12	-3.759e-12							EM62	0	4.343e-12	-4.343e-12								EM62	0	0	0							EM62	5.49e-13	0	5.49e-13
			EM63	0	0	0							EM63	0	8.07e-13	-8.07e-13							EM63	0	7.91e-13	-7.91e-13								EM63	0	0	0							EM63	1.3e-14	0	1.3e-14
			EM64	0	0	0							EM64	0	1.051e-12	-1.051e-12							EM64	0	1.091e-12	-1.091e-12								EM64	0	0	0							EM64	5.57e-13	0	5.57e-13
			EM65	0	0	0							EM65	0	6.8e-13	-6.8e-13							EM65	0	6.75e-13	-6.75e-13								EM65	0	0	0							EM65	2.72e-13	0	2.72e-13
			EM66	0	0	0							EM66	0	5.19e-13	-5.19e-13							EM66	0	5.33e-13	-5.33e-13								EM66	0	0	0							EM66	2.73e-13	0	2.73e-13
			EM67	0	0	0							EM67	0	4.28e-13	-4.28e-13							EM67	0	4.33e-13	-4.33e-13								EM67	0	0	0							EM67	2.72e-13	0	2.72e-13
[truncated: 41 more columns]

## Sheet: Initial   pH 5.99
Flux variability analysis
Uncontrolled pH 5.99 (Acidogenesis)																															Uncontrolled pH 5.99 (Solventogenesis)
*Biomass (Objective Function)										Acetic acid										Butyric acid (Objective Function)											*Biomass (Objective function)										Acetic acid
Original Network			Elementary Modes				External Metabolites			Original Network			Elementary Modes				External Metabolites			Original Network			Elementary Modes				External Metabolites				Original Network			Elementary Modes				External Metabolites			Original Network			Elementary Modes				External Metabolites
	Max	Min		Max	Min	Max-Min		Max	Min		Max	Min		Max	Min	Max-Min		Max	Min		Max	Min		Max	Min	Max-Min						Max	Min		Max	Min	Max-Min		Max	Min		Max	Min		Max	Min	Max-Min		Max
Reaction	Flux (mM/Lh)	Flux (mM/Lh)	EM_MAIN	Flux (mM/Lh)	Flux (mM/Lh)		EXTERNAL METABOLITE	Accumulation rate (mM/h)	Accumulation rate (mM/h)	Reaction	Flux (mM/Lh)	Flux (mM/Lh)	EM_MAIN	Flux (mM/Lh)	Flux (mM/Lh)		EXTERNAL METABOLITE	Accumulation rate (mM/h)	Accumulation rate (mM/h)	Reaction	Flux (mM/Lh)	Flux (mM/Lh)	EM_MAIN	Flux (mM/Lh)	Flux (mM/Lh)		EXTERNAL METABOLITE	Accumulation rate (mM/h)	Accumulation rate (mM/h)		Reaction	Flux (mM/Lh)	Flux (mM/Lh)	EM_MAIN	Flux (mM/Lh)	Flux (mM/Lh)		EXTERNAL METABOLITE	Accumulation rate (mM/h)	Accumulation rate (mM/h)	Reaction	Flux (mM/Lh)	Flux (mM/Lh)	EM_MAIN	Flux (mM/Lh)	Flux (mM/Lh)		EXTERNAL METABOLITE	Accumulation rate (mM/h)
AD1	47.8827	47.8827	EM1	0.00141727	0.000530909	0.00088636	H2	61.3915	61.3915	AD1	47.8827	47.8827	EM1	0.00152886	0.000498492	0.00103037	H2	61.3915	61.3915	AD1	47.8827	47.8827	EM1	0.000354423	0.000692723	-0.000338299	H2	61.3915	61.3915		AD1	184.3	184.3	EM1	4e-15	0	4e-15	H2	50.5	50.5	AD1	184.3	184.3	EM1	0	3.8e-14	-3.8e-14	H2	50.5
APP1	59.6261	59.6261	EM2	0.000300905	0.000796251	-0.000495346	*Biomass	71.8	71.8	APP1	59.6261	59.6261	EM2	0.000256979	0.000715742	-0.000458763	*Biomass	71.8	71.8	APP1	59.6261	59.6261	EM2	0.000881404	0.000671179	0.000210225	*Biomass	71.8	71.8		APP1	98.1	98.1	EM2	2e-15	0	2e-15	*Biomass	0	0	APP1	98.1	98.1	EM2	0	2.2e-14	-2.2e-14	*Biomass	0
APP2	59.6261	59.6261	EM3	0.617279	0.652339	-0.0350603	CO2	218.696	218.696	APP2	59.6261	59.6261	EM3	0.562909	0.904286	-0.341377	CO2	218.696	218.696	APP2	59.6261	59.6261	EM3	0.585994	0.691319	-0.105325	CO2	218.696	218.696		APP2	38.1	38.1	EM3	0.519467	0.658175	-0.138708	CO2	260	260	APP2	38.1	38.1	EM3	0.495341	0.510859	-0.0155178	CO2	260
APP3	59.6261	59.6261	EM4	4.43153	4.4681	-0.0365709	Acetate	35.5	35.5	APP3	59.6261	59.6261	EM4	4.45024	4.34748	0.102769	Acetate	35.5	35.5	APP3	59.6261	59.6261	EM4	4.47665	4.4257	0.0509516	Acetate	35.5	35.5		APP3	38.1	38.1	EM4	0.251846	0.278554	-0.0267083	Acetate	-26.2	-26.2	APP3	38.1	38.1	EM4	0.220973	0.230666	-0.00969295	Acetate	-26.2
APP4	59.6261	59.6261	EM5	0.00280297	0.00278211	2.08663e-05	Butyrate	59.6261	59.6261	APP4	59.6261	59.6261	EM5	0.00279823	0.00282079	-2.25677e-05	Butyrate	59.6261	59.6261	APP4	59.6261	59.6261	EM5	0.00278334	0.00279977	-1.64303e-05	Butyrate	59.6261	59.6261		APP4	38.1	38.1	EM5	0	0	0	Butyrate	-49.5	-49.5	APP4	38.1	38.1	EM5	0	1.9e-14	-1.9e-14	Butyrate	-49.5
APP6	35.5	35.5	EM6	2.714e-11	2e-15	2.7138e-11	Acetone	0	0	APP6	35.5	35.5	EM6	1.5e-14	8e-15	7e-15	Acetone	0	0	APP6	35.5	35.5	EM6	3e-15	3.06514e-09	-3.06513e-09	Acetone	0	0		APP6	-21.3563	-21.5528	EM6	8.955	10.239	-1.284	Acetone	60	60	APP6	-21.3363	-21.38	EM6	10.412	10.5131	-0.10118	Acetone	60
APP7	35.5	35.5	EM7	4.402e-12	0	4.402e-12	Ethanol	0	0	APP7	35.5	35.5	EM7	1e-15	1e-15	0	Ethanol	0	0	APP7	35.5	35.5	EM7	1e-15	7.88012e-10	-7.88011e-10	Ethanol	0	0		APP7	-21.3563	-21.5528	EM7	0.129573	0.117317	0.0122563	Ethanol	30	30	APP7	-21.3363	-21.38	EM7	0.142948	0.147829	-0.00488111	Ethanol	30
APP8	59.6261	59.6261	EM8	4.023e-12	0	4.023e-12	Butanol	0	0	APP8	59.6261	59.6261	EM8	1e-15	1e-15	0	Butanol	0	0	APP8	59.6261	59.6261	EM8	1e-15	7.75536e-10	-7.75535e-10	Butanol	0	0		APP8	5.65631	5.85276	EM8	23.2572	22.0951	1.1622	Butanol	87.6	87.6	APP8	5.63633	5.67995	EM8	21.6898	21.7155	-0.0257159	Butanol	87.6
APP9	59.6261	59.6261	EM9	7.193e-12	1e-15	7.192e-12	H2O	190.668	190.668	APP9	59.6261	59.6261	EM9	1e-15	2e-15	-1e-15	H2O	190.668	190.668	APP9	59.6261	59.6261	EM9	1e-15	9.61926e-10	-9.61925e-10	H2O	190.668	190.668		APP9	5.65631	5.85276	EM9	0.472756	0.480507	-0.00775044	H2O	200	200	APP9	5.63633	5.67995	EM9	0.432766	0.433876	-0.00110984	H2O	200
BP1	0.032068	0.032068	EM10	8.039e-12	1e-15	8.038e-12	Glucose	100	100	BP1	0.032068	0.032068	EM10	0	2e-15	-2e-15	Glucose	100	100	BP1	0.032068	0.032068	EM10	1e-15	1.5333e-09	-1.5333e-09	Glucose	100	100		BP1	0	0	EM10	3.81167	6.28899	-2.47733	Glucose	100	100	BP1	0	0	EM10	7.04645	6.93402	0.112427	Glucose	100
EM1	61.3915	61.3915	EM11	3.471e-12	0	3.471e-12				EM1	61.3915	61.3915	EM11	1e-15	1e-15	0				EM1	61.3915	61.3915	EM11	0	6.32655e-10	-6.32655e-10					EM1	50.5	50.5	EM11	0.0895688	0.0788175	0.0107514				EM1	50.5	50.5	EM11	0.0961932	0.100079	-0.00388607
EM10	71.8	71.8	EM12	8.732e-12	1e-15	8.731e-12	Biomass is an objective function for all calculation in this sheet with a .			EM10	71.8	71.8	EM12	2e-15	2e-15	0				EM10	71.8	71.8	EM12	1e-15	1.67022e-09	-1.67022e-09					EM10	0	0	EM12	0.800227	0.752636	0.047591				EM10	0	0	EM12	0.774075	0.727508	0.0465668
EM3	218.696	218.696	EM13	3.285e-12	0	3.285e-12	fixed flux value.			EM3	218.696	218.696	EM13	1e-15	1e-15	0				EM3	218.696	218.696	EM13	0	6.24827e-10	-6.24827e-10					EM3	260	260	EM13	0.126656	0.122668	0.00398722				EM3	260	260	EM13	0.134762	0.140278	-0.00551635
EM4	35.5	35.5	EM14	4.402e-12	0	4.402e-12				EM4	35.5	35.5	EM14	1e-15	1e-15	0				EM4	35.5	35.5	EM14	1e-15	7.88012e-10	-7.88011e-10					EM4	-26.2	-26.2	EM14	0.129573	0.117317	0.0122563				EM4	-26.2	-26.2	EM14	0.142948	0.147829	-0.00488111
EM5	59.6261	59.6261	EM15	7.193e-12	1e-15	7.192e-12	Max - maximizing the flux of a specific metabolite when biomass is an objective			EM5	59.6261	59.6261	EM15	1e-15	2e-15	-1e-15				EM5	59.6261	59.6261	EM15	1e-15	9.61926e-10	-9.61925e-10					EM5	-49.5	-49.5	EM15	0.472756	0.480507	-0.00775044				EM5	-49.5	-49.5	EM15	0.432766	0.433876	-0.00110984
EM6	0	0	EM16	3.471e-12	0	3.471e-12	function with fixed flux value.			EM6	0	0	EM16	1e-15	1e-15	0				EM6	0	0	EM16	0	6.32655e-10	-6.32655e-10					EM6	60	60	EM16	0.0895688	0.0788175	0.0107514				EM6	60	60	EM16	0.0961932	0.100079	-0.00388607
EM7	0	0	EM17	3.285e-12	0	3.285e-12				EM7	0	0	EM17	1e-15	1e-15	0				EM7	0	0	EM17	0	6.24827e-10	-6.24827e-10					EM7	30	30	EM17	0.126656	0.122668	0.00398722				EM7	30	30	EM17	0.134762	0.140278	-0.00551635
EM8	0	0	EM18	4.792e-12	0	4.792e-12	Min - minimizing the flux of a specific metabolite when biomass is an objective			EM8	0	0	EM18	2e-15	1e-15	1e-15				EM8	0	0	EM18	1e-15	6.35857e-10	-6.35856e-10					EM8	87.6	87.6	EM18	0.0895169	0.112655	-0.0231378				EM8	87.6	87.6	EM18	0.111256	0.0888988	0.0223573
EM9	190.668	190.668	EM19	5.817e-12	1e-15	5.816e-12	function with fixed flux value.			EM9	190.668	190.668	EM19	3e-15	1e-15	2e-15				EM9	190.668	190.668	EM19	1e-15	8.44114e-10	-8.44113e-10					EM9	200	200	EM19	1.54553	1.69975	-0.154226				EM9	200	200	EM19	1.37728	1.44843	-0.0711507
EMP1	100	100	EM20	8.35e-13	0	8.35e-13				EMP1	100	100	EM20	0	0	0				EMP1	100	100	EM20	0	1.47577e-10	-1.47577e-10					EMP1	100	100	EM20	0.0218608	0.0206371	0.00122362				EMP1	100	100	EM20	0.0235911	0.0229735	0.000617566
EMP2	100	100	EM21	3.242e-12	0	3.242e-12	Observation:			EMP2	100	100	EM21	2e-15	1e-15	1e-15				EMP2	100	100	EM21	0	5.02138e-10	-5.02138e-10					EMP2	100	100	EM21	0.065489	0.0857207	-0.0202317				EMP2	100	100	EM21	0.082701	0.0699166	0.0127843
EMP3	97.3063	97.3063	EM22	2.951e-12	0	2.951e-12	Flux distribution of original network is unique and there is variation in			EMP3	97.3063	97.3063	EM22	0	1e-15	-1e-15				EMP3	97.3063	97.3063	EM22	0	3.94997e-10	-3.94997e-10					EMP3	100	100	EM22	0.181647	0.190355	-0.00870822				EMP3	100	100	EM22	0.158658	0.16577	-0.00711246
EMP4	97.3063	97.3063	EM23	6.8e-13	0	6.8e-13	sets of flux values in EMs (comparison is based on maximizing and			EMP4	97.3063	97.3063	EM23	0	0	0				EMP4	97.3063	97.3063	EM23	0	1.22991e-10	-1.22991e-10					EMP4	100	100	EM23	0.017655	0.015834	0.00182096				EMP4	100	100	EM23	0.0187029	0.0167634	0.00193955
EMP5	193.266	193.266	EM24	1.648e-12	0	1.648e-12	minimizing a specific metabolite when flux value of biomass was fixed)			EMP5	193.266	193.266	EM24	0	0	0				EMP5	193.266	193.266	EM24	0	3.0598e-10	-3.0598e-10					EMP5	200	200	EM24	0.100723	0.0880964	0.0126266				EMP5	200	200	EM24	0.099508	0.0987933	0.00071467
EMP6	190.668	190.668	EM25	4.792e-12	0	4.792e-12				EMP6	190.668	190.668	EM25	2e-15	1e-15	1e-15				EMP6	190.668	190.668	EM25	1e-15	6.35857e-10	-6.35856e-10					EMP6	200	200	EM25	0.0895169	0.112655	-0.0231378				EMP6	200	200	EM25	0.111256	0.0888988	0.0223573
EMP7	83.8699	83.8699	EM26	8.35e-13	0	8.35e-13	Note: This methodology is adapted from Mahadevan and Schilling_2003 to			EMP7	83.8699	83.8699	EM26	0	0	0				EMP7	83.8699	83.8699	EM26	0	1.47577e-10	-1.47577e-10					EMP7	100	100	EM26	0.0218608	0.0206371	0.00122362				EMP7	100	100	EM26	0.0235911	0.0229735	0.000617566
HPP1	165.655	165.655	EM27	2.951e-12	0	2.951e-12	calculate the flux variability wherein the same optimal objective.			HPP1	165.655	165.655	EM27	0	1e-15	-1e-15				HPP1	165.655	165.655	EM27	0	3.94997e-10	-3.94997e-10					HPP1	200	200	EM27	0.181647	0.190355	-0.00870822				HPP1	200	200	EM27	0.158658	0.16577	-0.00711246
HPP2	96.2037	96.2037	EM28	6.8e-13	0	6.8e-13				HPP2	96.2037	96.2037	EM28	0	0	0				HPP2	96.2037	96.2037	EM28	0	1.22991e-10	-1.22991e-10					HPP2	0	0	EM28	0.017655	0.015834	0.00182096				HPP2	0	0	EM28	0.0187029	0.0167634	0.00193955
HPP3	8.06009	8.06009	EM29	3e-15	0	3e-15				HPP3	8.06009	8.06009	EM29	0	0	0				HPP3	8.06009	8.06009	EM29	0	4.94e-13	-4.94e-13					HPP3	149.5	149.5	EM29	2e-15	0	2e-15				HPP3	149.5	149.5	EM29	0	8.8e-14	-8.8e-14
HPP4	61.3915	61.3915	EM30	1e-15	0	1e-15				HPP4	61.3915	61.3915	EM30	0	0	0				HPP4	61.3915	61.3915	EM30	0	1.48e-13	-1.48e-13					HPP4	50.5	50.5	EM30	0	0	0				HPP4	50.5	50.5	EM30	0	2.5e-14	-2.5e-14
PPP2	2.6937	2.6937	EM31	4.0524e-11	3e-15	4.0521e-11				PPP2	2.6937	2.6937	EM31	4e-15	1e-14	-6e-15				PPP2	2.6937	2.6937	EM31	5e-15	4.60879e-09	-4.60879e-09					PPP2	0	0	EM31	8.70131	6.22043	2.48088				PPP2	0	0	EM31	5.90677	5.71924	0.187529
PPP3	-2.6937	-2.6937	EM32	7e-15	0	7e-15				PPP3	-2.6937	-2.6937	EM32	0	0	0				PPP3	-2.6937	-2.6937	EM32	0	1.43e-12	-1.43e-12					PPP3	0	0	EM32	2e-15	0	2e-15				PPP3	0	0	EM32	0	1.1e-13	-1.1e-13
PPP4	-1.34685	-1.34685	EM33	1e-15	0	1e-15				PPP4	-1.34685	-1.34685	EM33	0	0	0				PPP4	-1.34685	-1.34685	EM33	0	2.3e-13	-2.3e-13					PPP4	0	0	EM33	1e-15	0	1e-15				PPP4	0	0	EM33	0	4.1e-14	-4.1e-14
PPP5	-1.34685	-1.34685	EM34	1e-15	0	1e-15				PPP5	-1.34685	-1.34685	EM34	0	0	0				PPP5	-1.34685	-1.34685	EM34	0	1.48e-13	-1.48e-13					PPP5	0	0	EM34	0	0	0				PPP5	0	0	EM34	0	2.5e-14	-2.5e-14
PPP6	-1.34685	-1.34685	EM35	1e-15	0	1e-15				PPP6	-1.34685	-1.34685	EM35	0	0	0				PPP6	-1.34685	-1.34685	EM35	0	2.3e-13	-2.3e-13					PPP6	0	0	EM35	1e-15	0	1e-15				PPP6	0	0	EM35	0	4.1e-14	-4.1e-14
SPP1	0	0	EM36	9.476e-12	1e-15	9.475e-12				SPP1	0	0	EM36	3e-15	2e-15	1e-15				SPP1	0	0	EM36	1e-15	8.99593e-10	-8.99592e-10					SPP1	30	30	EM36	7.07794	6.85667	0.221267				SPP1	30	30	EM36	7.11055	7.11582	-0.00527374
SPP2	0	0	EM37	7e-15	0	7e-15				SPP2	0	0	EM37	0	0	0				SPP2	0	0	EM37	0	6.46e-13	-6.46e-13					SPP2	30	30	EM37	2e-15	0	2e-15				SPP2	30	30	EM37	0	1.15e-13	-1.15e-13
SPP3	0	0	EM38	0	0	0				SPP3	0	0	EM38	0	0	0				SPP3	0	0	EM38	0	5.8e-14	-5.8e-14					SPP3	4.84369	4.64724	EM38	0	0	0				SPP3	4.86367	4.82005	EM38	0	1e-14	-1e-14
SPP4	0	0	EM39	1.5898e-11	1e-15	1.5897e-11				SPP4	0	0	EM39	2e-15	4e-15	-2e-15				SPP4	0	0	EM39	2e-15	1.52866e-09	-1.52866e-09					SPP4	55.1563	55.3528	EM39	0.901728	0.883669	0.0180594				SPP4	55.1363	55.18	EM39	0.931405	0.970599	-0.0391941
SPP5	0	0	EM40	2e-15	0	2e-15				SPP5	0	0	EM40	0	0	0				SPP5	0	0	EM40	0	1.069e-12	-1.069e-12					SPP5	60	60	EM40	0	0	0				SPP5	60	60	EM40	0	6e-15	-6e-15
SPP6	0	0	EM41	0	0	0				SPP6	0	0	EM41	0	0	0				SPP6	0	0	EM41	0	4.1e-14	-4.1e-14					SPP6	87.6	87.6	EM41	0	0	0				SPP6	87.6	87.6	EM41	0	7e-15	-7e-15
SPP7	0	0	EM42	3.4323e-11	3e-15	3.432e-11				SPP7	0	0	EM42	1.2e-14	1e-14	2e-15				SPP7	0	0	EM42	4e-15	1.33338e-09	-1.33338e-09					SPP7	87.6	87.6	EM42	0.117092	0.172105	-0.0550128				SPP7	87.6	87.6	EM42	0.149566	0.102268	0.0472982
			EM43	2e-15	0	2e-15							EM43	0	0	0							EM43	0	9.9e-14	-9.9e-14								EM43	0	0	0							EM43	0	5e-15	-5e-15
			EM44	2e-15	0	2e-15							EM44	0	0	0							EM44	0	9.9e-14	-9.9e-14								EM44	0	0	0							EM44	0	5e-15	-5e-15
			EM45	0	0	0							EM45	0	0	0							EM45	0	5.8e-14	-5.8e-14								EM45	0	0	0							EM45	0	1e-14	-1e-14
			EM46	1.1596e-11	1e-15	1.1595e-11							EM46	2e-15	2e-15	0							EM46	1e-15	1.1363e-09	-1.1363e-09								EM46	0.172672	0.176626	-0.0039536							EM46	0.157213	0.166053	-0.00884073
			EM47	1.1596e-11	1e-15	1.1595e-11							EM47	2e-15	2e-15	0							EM47	1e-15	1.1363e-09	-1.1363e-09								EM47	0.172672	0.176626	-0.0039536							EM47	0.157213	0.166053	-0.00884073
			EM48	1e-15	0	1e-15							EM48	0	0	0							EM48	0	1.7e-13	-1.7e-13								EM48	0	0	0							EM48	0	6e-15	-6e-15
			EM49	1e-15	0	1e-15							EM49	0	0	0							EM49	0	1.7e-13	-1.7e-13								EM49	0	0	0							EM49	0	6e-15	-6e-15
			EM50	0	0	0							EM50	0	0	0							EM50	0	4.1e-14	-4.1e-14								EM50	0	0	0							EM50	0	7e-15	-7e-15
			EM51	2e-15	0	2e-15							EM51	0	0	0							EM51	0	4.16e-13	-4.16e-13								EM51	1e-15	0	1e-15							EM51	0	1.05e-13	-1.05e-13
			EM52	3e-15	0	3e-15							EM52	0	0	0							EM52	0	5.49e-13	-5.49e-13								EM52	1.3e-14	0	1.3e-14							EM52	0	1.33e-13	-1.33e-13
			EM53	1e-15	0	1e-15							EM53	0	0	0							EM53	0	1.39e-13	-1.39e-13								EM53	2e-15	0	2e-15							EM53	0	1.7e-14	-1.7e-14
			EM54	3e-15	0	3e-15							EM54	0	0	0							EM54	0	5.08e-13	-5.08e-13								EM54	1.9e-14	0	1.9e-14							EM54	0	2.03e-13	-2.03e-13
			EM55	0.151372	0.131954	0.0194182							EM55	0.143406	0.189702	-0.046296							EM55	0.154005	0.163143	-0.00913806								EM55	0.0583172	0.0781664	-0.0198492							EM55	0.0714421	0.0569585	0.0144836
			EM56	1.526e-12	0	1.526e-12							EM56	0	0	0							EM56	0	2.38338e-10	-2.38338e-10								EM56	0.0237043	0.0215611	0.00214327							EM56	0.0257783	0.0336917	-0.00791335
			EM57	1.526e-12	0	1.526e-12							EM57	0	0	0							EM57	0	2.38338e-10	-2.38338e-10								EM57	0.0237043	0.0215611	0.00214327							EM57	0.0257783	0.0336917	-0.00791335
			EM58	1.8e-14	0	1.8e-14							EM58	0	0	0							EM58	0	1.376e-12	-1.376e-12								EM58	1e-15	0	1e-15							EM58	0	8e-15	-8e-15
			EM59	1.174e-12	0	1.174e-12							EM59	0	0	0							EM59	0	2.02402e-10	-2.02402e-10								EM59	0.0235817	0.0197811	0.00380053							EM59	0.0253738	0.0209922	0.00438158
			EM60	5.813e-12	1e-15	5.812e-12							EM60	1e-15	1e-15	0							EM60	1e-15	6.9523e-10	-6.95229e-10								EM60	0.138417	0.133011	0.00540577							EM60	0.131815	0.137001	-0.00518666
			EM61	1.174e-12	0	1.174e-12							EM61	0	0	0							EM61	0	2.02402e-10	-2.02402e-10								EM61	0.0235817	0.0197811	0.00380053							EM61	0.0253738	0.0209922	0.00438158
			EM62	1e-14	0	1e-14							EM62	0	0	0							EM62	0	1.437e-12	-1.437e-12								EM62	1.1e-14	0	1.1e-14							EM62	0	6.7e-14	-6.7e-14
			EM63	2e-15	0	2e-15							EM63	0	0	0							EM63	0	4.1e-13	-4.1e-13								EM63	3e-15	0	3e-15							EM63	0	1.71e-13	-1.71e-13
			EM64	3e-15	0	3e-15							EM64	0	0	0							EM64	0	5.6e-13	-5.6e-13								EM64	5e-15	0	5e-15							EM64	0	1.45e-13	-1.45e-13
			EM65	2e-15	0	2e-15							EM65	0	0	0							EM65	0	3.58e-13	-3.58e-13								EM65	4e-15	0	4e-15							EM65	0	2.63e-13	-2.63e-13
			EM66	1e-15	0	1e-15							EM66	0	0	0							EM66	0	2.79e-13	-2.79e-13								EM66	2e-15	0	2e-15							EM66	0	7.2e-14	-7.2e-14
			EM67	1e-15	0	1e-15							EM67	0	0	0							EM67	0	2.31e-13	-2.31e-13								EM67	3e-15	0	3e-15							EM67	0	7.7e-14	-7.7e-14
[truncated: 41 more columns]

## Sheet: Initial  pH 4.5
Flux variability analysis
Uncontrolled pH 4.5 (Acidogenesis)																															Uncontrolled pH 4.5 (Solventogenesis)
*Biomass (Objective Function)										Acetic acid										Butyric acid (Objective Function)											*Biomass (Objective function)										Acetic acid
Original Network			Elementary Modes				External Metabolites			Original Network			Elementary Modes				External Metabolites			Original Network			Elementary Modes				External Metabolites				Original Network			Elementary Modes				External Metabolites			Original Network			Elementary Modes				External Metabolites
	Max	Min		Max	Min	Max-Min		Max	Min		Max	Min		Max	Min	Max-Min		Max	Min		Max	Min		Max	Min	Max-Min						Max	Min		Max	Min	Max-Min		Max	Min		Max	Min		Max	Min	Max-Min		Max
Reaction	Flux (mM/Lh)	Flux (mM/Lh)	EM_MAIN	Flux (mM/Lh)	Flux (mM/Lh)		EXTERNAL METABOLITE	Accumulation rate (mM/h)	Accumulation rate (mM/h)	Reaction	Flux (mM/Lh)	Flux (mM/Lh)	EM_MAIN	Flux (mM/Lh)	Flux (mM/Lh)		EXTERNAL METABOLITE	Accumulation rate (mM/h)	Accumulation rate (mM/h)	Reaction	Flux (mM/Lh)	Flux (mM/Lh)	EM_MAIN	Flux (mM/Lh)	Flux (mM/Lh)		EXTERNAL METABOLITE	Accumulation rate (mM/h)	Accumulation rate (mM/h)		Reaction	Flux (mM/Lh)	Flux (mM/Lh)	EM_MAIN	Flux (mM/Lh)	Flux (mM/Lh)		EXTERNAL METABOLITE	Accumulation rate (mM/h)	Accumulation rate (mM/h)	Reaction	Flux (mM/Lh)	Flux (mM/Lh)	EM_MAIN	Flux (mM/Lh)	Flux (mM/Lh)		EXTERNAL METABOLITE	Accumulation rate (mM/h)
AD1	36.4552	36.4552	EM1	0.0005196	0.000442539	7.70615e-05	H2	59.0976	59.0976	AD1	36.4552	36.4552	EM1	0.000578352	0.000495352	8.29996e-05	H2	59.0976	59.0976	AD1	36.4552	36.4552	EM1	0.000481942	0.000321655	0.000160288	H2	59.0976	59.0976		AD1	241	241	EM1	0	0	0	H2	114.05	114.05	AD1	241	241	EM1	0	0	0	H2	114.05
APP1	58.0178	58.0178	EM2	0.000326275	0.000321455	4.82031e-06	*Biomass	75	75	APP1	58.0178	58.0178	EM2	0.000294086	0.000272445	2.16403e-05	*Biomass	75	75	APP1	58.0178	58.0178	EM2	0.000311672	0.00040095	-8.92786e-05	*Biomass	75	75		APP1	90.95	90.95	EM2	0	0	0	*Biomass	0	0	APP1	90.95	90.95	EM2	0	0	0	*Biomass	0
APP2	58.0178	58.0178	EM3	0.347365	0.496469	-0.149105	CO2	219.529	219.529	APP2	58.0178	58.0178	EM3	0.34137	0.536679	-0.195309	CO2	219.529	219.529	APP2	58.0178	58.0178	EM3	0.395723	0.41569	-0.0199669	CO2	219.529	219.529		APP2	49.95	49.95	EM3	2.95249	3.19225	-0.239769	CO2	241	241	APP2	49.95	49.95	EM3	2.87294	1.99759	0.875351	CO2	241
APP3	58.0178	58.0178	EM4	3.45938	3.39928	0.0600981	Acetate	36.7	36.7	APP3	58.0178	58.0178	EM4	3.45809	3.3742	0.0838886	Acetate	36.7	36.7	APP3	58.0178	58.0178	EM4	3.42413	3.42823	-0.00409938	Acetate	36.7	36.7		APP3	49.95	49.95	EM4	0.872075	0.976053	-0.103978	Acetate	0	0	APP3	49.95	49.95	EM4	0.849534	0.729937	0.119597	Acetate	0
APP4	58.0178	58.0178	EM5	0.00311528	0.00313262	-1.73404e-05	Butyrate	58.0178	58.0178	APP4	58.0178	58.0178	EM5	0.00311641	0.00314166	-2.5256e-05	Butyrate	58.0178	58.0178	APP4	58.0178	58.0178	EM5	0.00312865	0.003125	3.65392e-06	Butyrate	58.0178	58.0178		APP4	49.95	49.95	EM5	0	0	0	Butyrate	0	0	APP4	49.95	49.95	EM5	0	0	0	Butyrate	0
APP6	36.7	36.7	EM6	1.27744e-10	9.62877e-10	-8.35133e-10	Acetone	0	0	APP6	36.7	36.7	EM6	9.8499e-11	8.405e-11	1.4449e-11	Acetone	0	0	APP6	36.7	36.7	EM6	7.06306e-10	2.22063e-09	-1.51433e-09	Acetone	0	0		APP6	18.1776	17.8854	EM6	3.14471	3.13847	0.00624656	Acetone	41	41	APP6	18.3587	19.4143	EM6	3.08915	3.09614	-0.00698658	Acetone	41
APP7	36.7	36.7	EM7	2.4563e-11	1.69483e-10	-1.4492e-10	Ethanol	0	0	APP7	36.7	36.7	EM7	1.4492e-11	1.7669e-11	-3.177e-12	Ethanol	0	0	APP7	36.7	36.7	EM7	1.37171e-10	4.52779e-10	-3.15608e-10	Ethanol	0	0		APP7	18.1776	17.8854	EM7	0.182314	0.150035	0.0322791	Ethanol	18.1	18.1	APP7	18.3587	19.4143	EM7	0.19623	0.444342	-0.248111	Ethanol	18.1
APP8	58.0178	58.0178	EM8	2.2691e-11	1.55798e-10	-1.33107e-10	Butanol	0	0	APP8	58.0178	58.0178	EM8	1.3473e-11	1.6059e-11	-2.586e-12	Butanol	0	0	APP8	58.0178	58.0178	EM8	1.23938e-10	3.7835e-10	-2.54412e-10	Butanol	0	0		APP8	22.8224	23.1146	EM8	2.19006	2.52632	-0.336262	Butanol	49.95	49.95	APP8	22.6413	21.5857	EM8	2.12328	2.30696	-0.18368	Butanol	49.95
APP9	58.0178	58.0178	EM9	4.243e-11	2.77916e-10	-2.35486e-10	H2O	190.252	190.252	APP9	58.0178	58.0178	EM9	2.3782e-11	2.9463e-11	-5.681e-12	H2O	190.252	190.252	APP9	58.0178	58.0178	EM9	2.25507e-10	7.84927e-10	-5.5942e-10	H2O	190.252	190.252		APP9	22.8224	23.1146	EM9	1.22632	1.19714	0.0291769	H2O	200	200	APP9	22.6413	21.5857	EM9	1.22482	1.05863	0.166191	H2O	200
BP1	0.033497	0.033497	EM10	4.7086e-11	3.09807e-10	-2.62721e-10	Glucose	100	100	BP1	0.033497	0.033497	EM10	2.6504e-11	3.2263e-11	-5.759e-12	Glucose	100	100	BP1	0.033497	0.033497	EM10	2.50593e-10	8.44129e-10	-5.93536e-10	Glucose	100	100		BP1	0	0	EM10	7.25692	9.56619	-2.30927	Glucose	100	100	BP1	0	0	EM10	6.90158	4.39611	2.50546	Glucose	100
EM1	59.0976	59.0976	EM11	1.9615e-11	1.33835e-10	-1.1422e-10				EM1	59.0976	59.0976	EM11	1.1552e-11	1.4001e-11	-2.449e-12				EM1	59.0976	59.0976	EM11	1.07749e-10	3.56309e-10	-2.4856e-10					EM1	114.05	114.05	EM11	0.0931165	0.100294	-0.00717702				EM1	114.05	114.05	EM11	0.122085	0.358362	-0.236277
EM10	75	75	EM12	4.901e-11	3.39439e-10	-2.90429e-10	Biomass is an objective function for all calculation in this sheet with a .			EM10	75	75	EM12	2.9281e-11	3.5251e-11	-5.97e-12				EM10	75	75	EM12	2.74355e-10	8.84327e-10	-6.09972e-10					EM10	0	0	EM12	3.76299	3.78286	-0.0198672				EM10	0	0	EM12	3.77336	3.53862	0.234741
EM3	219.529	219.529	EM13	1.8811e-11	1.28395e-10	-1.09584e-10	fixed flux value.			EM3	219.529	219.529	EM13	1.0902e-11	1.3258e-11	-2.356e-12				EM3	219.529	219.529	EM13	1.01825e-10	3.4334e-10	-2.41515e-10					EM3	241	241	EM13	0.274431	0.254893	0.019538				EM3	241	241	EM13	0.321345	0.828299	-0.506954
EM4	36.7	36.7	EM14	2.4563e-11	1.69483e-10	-1.4492e-10				EM4	36.7	36.7	EM14	1.4492e-11	1.7669e-11	-3.177e-12				EM4	36.7	36.7	EM14	1.37171e-10	4.52779e-10	-3.15608e-10					EM4	0	0	EM14	0.182314	0.150035	0.0322791				EM4	0	0	EM14	0.19623	0.444342	-0.248111
EM5	58.0178	58.0178	EM15	4.243e-11	2.77916e-10	-2.35486e-10	Max - maximizing the flux of a specific metabolite when biomass is an objective			EM5	58.0178	58.0178	EM15	2.3782e-11	2.9463e-11	-5.681e-12				EM5	58.0178	58.0178	EM15	2.25507e-10	7.84927e-10	-5.5942e-10					EM5	0	0	EM15	1.22632	1.19714	0.0291769				EM5	0	0	EM15	1.22482	1.05863	0.166191
EM6	0	0	EM16	1.9615e-11	1.33835e-10	-1.1422e-10	function with fixed flux value.			EM6	0	0	EM16	1.1552e-11	1.4001e-11	-2.449e-12				EM6	0	0	EM16	1.07749e-10	3.56309e-10	-2.4856e-10					EM6	41	41	EM16	0.0931165	0.100294	-0.00717702				EM6	41	41	EM16	0.122085	0.358362	-0.236277
EM7	0	0	EM17	1.8811e-11	1.28395e-10	-1.09584e-10				EM7	0	0	EM17	1.0902e-11	1.3258e-11	-2.356e-12				EM7	0	0	EM17	1.01825e-10	3.4334e-10	-2.41515e-10					EM7	18.1	18.1	EM17	0.274431	0.254893	0.019538				EM7	18.1	18.1	EM17	0.321345	0.828299	-0.506954
EM8	0	0	EM18	2.3458e-11	1.73942e-10	-1.50484e-10	Min - minimizing the flux of a specific metabolite when biomass is an objective			EM8	0	0	EM18	1.6505e-11	1.641e-11	9.5e-14				EM8	0	0	EM18	1.35403e-10	4.34852e-10	-2.99449e-10					EM8	49.95	49.95	EM18	0.817177	0.612238	0.204939				EM8	49.95	49.95	EM18	0.756715	0.249585	0.507131
EM9	190.252	190.252	EM19	2.6473e-11	2.04986e-10	-1.78513e-10	function with fixed flux value.			EM9	190.252	190.252	EM19	2.1588e-11	1.9189e-11	2.399e-12				EM9	190.252	190.252	EM19	1.61374e-10	4.79593e-10	-3.18219e-10					EM9	200	200	EM19	2.86428	0.103174	2.76111				EM9	200	200	EM19	2.83485	0.214708	2.62015
EMP1	100	100	EM20	4.659e-12	3.2594e-11	-2.7935e-11				EMP1	100	100	EM20	2.686e-12	3.383e-12	-6.97e-13				EMP1	100	100	EM20	2.5637e-11	8.3428e-11	-5.7791e-11					EMP1	100	100	EM20	0.0508478	0.0518053	-0.000957557				EMP1	100	100	EM20	0.0558992	0.113575	-0.0576753
EMP2	100	100	EM21	1.6115e-11	1.22589e-10	-1.06474e-10	Observation:			EMP2	100	100	EM21	1.1294e-11	1.1863e-11	-5.69e-13				EMP2	100	100	EM21	9.3716e-11	3.05446e-10	-2.1173e-10					EMP2	100	100	EM21	0.741934	0.621945	0.119989				EMP2	100	100	EM21	0.700325	0.422553	0.277772
EMP3	97.1862	97.1862	EM22	1.7242e-11	1.14044e-10	-9.6802e-11	Flux distribution of original network is unique and there is variation in			EMP3	97.1862	97.1862	EM22	9.584e-12	1.1556e-11	-1.972e-12				EMP3	97.1862	97.1862	EM22	9.0994e-11	3.16642e-10	-2.25648e-10					EMP3	100	100	EM22	0.666596	0.733904	-0.0673083				EMP3	100	100	EM22	0.649503	0.534306	0.115198
EMP4	97.1862	97.1862	EM23	3.846e-12	2.6402e-11	-2.2556e-11	sets of flux values in EMs (comparison is based on maximizing and			EMP4	97.1862	97.1862	EM23	2.242e-12	2.761e-12	-5.19e-13				EMP4	97.1862	97.1862	EM23	2.0972e-11	6.9185e-11	-4.8213e-11					EMP4	100	100	EM23	0.0236536	0.0282604	-0.00460681				EMP4	100	100	EM23	0.0287732	0.0817982	-0.053025
EMP5	192.966	192.966	EM24	9.379e-12	6.4801e-11	-5.5422e-11	minimizing a specific metabolite when flux value of biomass was fixed)			EMP5	192.966	192.966	EM24	5.444e-12	6.615e-12	-1.171e-12				EMP5	192.966	192.966	EM24	5.1165e-11	1.65793e-10	-1.14628e-10					EMP5	200	200	EM24	0.607232	0.586815	0.0204177				EMP5	200	200	EM24	0.61285	0.513122	0.0997285
EMP6	190.252	190.252	EM25	2.3458e-11	1.73942e-10	-1.50484e-10				EMP6	190.252	190.252	EM25	1.6505e-11	1.641e-11	9.5e-14				EMP6	190.252	190.252	EM25	1.35403e-10	4.34852e-10	-2.99449e-10					EMP6	200	200	EM25	0.817177	0.612238	0.204939				EMP6	200	200	EM25	0.756715	0.249585	0.507131
EMP7	83.151	83.151	EM26	4.659e-12	3.2594e-11	-2.7935e-11	Note: This methodology is adapted from Mahadevan and Schilling_2003 to			EMP7	83.151	83.151	EM26	2.686e-12	3.383e-12	-6.97e-13				EMP7	83.151	83.151	EM26	2.5637e-11	8.3428e-11	-5.7791e-11					EMP7	100	100	EM26	0.0508478	0.0518053	-0.000957557				EMP7	100	100	EM26	0.0558992	0.113575	-0.0576753
HPP1	164.125	164.125	EM27	1.7242e-11	1.14044e-10	-9.6802e-11	calculate the flux variability wherein the same optimal objective.			HPP1	164.125	164.125	EM27	9.584e-12	1.1556e-11	-1.972e-12				HPP1	164.125	164.125	EM27	9.0994e-11	3.16642e-10	-2.25648e-10					HPP1	200	200	EM27	0.666596	0.733904	-0.0673083				HPP1	200	200	EM27	0.649503	0.534306	0.115198
HPP2	100.491	100.491	EM28	3.846e-12	2.6402e-11	-2.2556e-11				HPP2	100.491	100.491	EM28	2.242e-12	2.761e-12	-5.19e-13				HPP2	100.491	100.491	EM28	2.0972e-11	6.9185e-11	-4.8213e-11					HPP2	0	0	EM28	0.0236536	0.0282604	-0.00460681				HPP2	0	0	EM28	0.0287732	0.0817982	-0.053025
HPP3	4.53575	4.53575	EM29	1.5e-14	1.07e-13	-9.2e-14				HPP3	4.53575	4.53575	EM29	9e-15	1.1e-14	-2e-15				HPP3	4.53575	4.53575	EM29	8.4e-14	2.6e-13	-1.76e-13					HPP3	85.95	85.95	EM29	0	0	0				HPP3	85.95	85.95	EM29	0	0	0
HPP4	59.0976	59.0976	EM30	4e-15	3.1e-14	-2.7e-14				HPP4	59.0976	59.0976	EM30	3e-15	3e-15	0				HPP4	59.0976	59.0976	EM30	2.5e-14	8e-14	-5.5e-14					HPP4	114.05	114.05	EM30	0	0	0				HPP4	114.05	114.05	EM30	0	0	0
PPP2	2.81376	2.81376	EM31	2.5244e-10	1.62994e-09	-1.3775e-09				PPP2	2.81376	2.81376	EM31	1.29848e-10	1.78727e-10	-4.8879e-11				PPP2	2.81376	2.81376	EM31	1.37036e-09	4.93197e-09	-3.56161e-09					PPP2	0	0	EM31	2.2268	2.4509	-0.224096				PPP2	0	0	EM31	2.21996	1.6405	0.579469
PPP3	-2.81376	-2.81376	EM32	4.2e-14	2.65e-13	-2.23e-13				PPP3	-2.81376	-2.81376	EM32	2.1e-14	3e-14	-9e-15				PPP3	-2.81376	-2.81376	EM32	2.13e-13	7.48e-13	-5.35e-13					PPP3	0	0	EM32	0	0	0				PPP3	0	0	EM32	0	0	0
PPP4	-1.40688	-1.40688	EM33	7e-15	4.5e-14	-3.8e-14				PPP4	-1.40688	-1.40688	EM33	4e-15	5e-15	-1e-15				PPP4	-1.40688	-1.40688	EM33	3.6e-14	1.27e-13	-9.1e-14					PPP4	0	0	EM33	0	0	0				PPP4	0	0	EM33	0	0	0
PPP5	-1.40688	-1.40688	EM34	4e-15	3.1e-14	-2.7e-14				PPP5	-1.40688	-1.40688	EM34	3e-15	3e-15	0				PPP5	-1.40688	-1.40688	EM34	2.5e-14	8e-14	-5.5e-14					PPP5	0	0	EM34	0	0	0				PPP5	0	0	EM34	0	0	0
PPP6	-1.40688	-1.40688	EM35	7e-15	4.5e-14	-3.8e-14				PPP6	-1.40688	-1.40688	EM35	4e-15	5e-15	-1e-15				PPP6	-1.40688	-1.40688	EM35	3.6e-14	1.27e-13	-9.1e-14					PPP6	0	0	EM35	0	0	0				PPP6	0	0	EM35	0	0	0
SPP1	0	0	EM36	4.2386e-11	3.15854e-10	-2.73468e-10				SPP1	0	0	EM36	2.9692e-11	2.7918e-11	1.774e-12				SPP1	0	0	EM36	2.50643e-10	7.40865e-10	-4.90222e-10					SPP1	18.1	18.1	EM36	1.67054	3.84428	-2.17374				SPP1	18.1	18.1	EM36	1.92835	5.15704	-3.22869
SPP2	0	0	EM37	3.7e-14	2.49e-13	-2.12e-13				SPP2	0	0	EM37	2.3e-14	2.8e-14	-5e-15				SPP2	0	0	EM37	2.06e-13	4.25e-13	-2.19e-13					SPP2	18.1	18.1	EM37	0	0	0				SPP2	18.1	18.1	EM37	0	0	0
SPP3	0	0	EM38	2e-15	1.2e-14	-1e-14				SPP3	0	0	EM38	1e-15	1e-15	0				SPP3	0	0	EM38	1e-14	3.1e-14	-2.1e-14					SPP3	18.1776	17.8854	EM38	0	0	0				SPP3	18.3587	19.4143	EM38	0	0	0
SPP4	0	0	EM39	1.0184e-10	6.35806e-10	-5.33966e-10				SPP4	0	0	EM39	4.3081e-11	6.6154e-11	-2.3073e-11				SPP4	0	0	EM39	5.24414e-10	2.04191e-09	-1.5175e-09					SPP4	22.8224	23.1146	EM39	3.42951	2.73444	0.695066				SPP4	22.6413	21.5857	EM39	3.53215	4.60645	-1.07431
SPP5	0	0	EM40	1.3e-14	8.1e-14	-6.8e-14				SPP5	0	0	EM40	5e-15	1e-14	-5e-15				SPP5	0	0	EM40	6.3e-14	3.51e-13	-2.88e-13					SPP5	41	41	EM40	0	0	0				SPP5	41	41	EM40	0	0	0
SPP6	0	0	EM41	1e-15	9e-15	-8e-15				SPP6	0	0	EM41	1e-15	1e-15	0				SPP6	0	0	EM41	7e-15	2.6e-14	-1.9e-14					SPP6	49.95	49.95	EM41	0	0	0				SPP6	49.95	49.95	EM41	0	0	0
SPP7	0	0	EM42	2.02957e-10	1.2885e-09	-1.08554e-09				SPP7	0	0	EM42	1.27233e-10	1.31362e-10	-4.129e-12				SPP7	0	0	EM42	1.03793e-09	3.10243e-09	-2.06451e-09					SPP7	49.95	49.95	EM42	1.74269	1.64344	0.0992428				SPP7	49.95	49.95	EM42	1.63591	0.712028	0.92388
			EM43	7e-15	3e-14	-2.3e-14							EM43	6e-15	5e-15	1e-15							EM43	2.9e-14	5.8e-14	-2.9e-14								EM43	0	0	0							EM43	0	0	0
			EM44	7e-15	3e-14	-2.3e-14							EM44	6e-15	5e-15	1e-15							EM44	2.9e-14	5.8e-14	-2.9e-14								EM44	0	0	0							EM44	0	0	0
			EM45	2e-15	1.2e-14	-1e-14							EM45	1e-15	1e-15	0							EM45	1e-14	3.1e-14	-2.1e-14								EM45	0	0	0							EM45	0	0	0
			EM46	6.4287e-11	4.35426e-10	-3.71139e-10							EM46	3.8443e-11	4.2665e-11	-4.222e-12							EM46	3.47015e-10	1.16385e-09	-8.16834e-10								EM46	0.754063	0.757361	-0.00329788							EM46	0.736081	0.607762	0.128319
			EM47	6.4287e-11	4.35426e-10	-3.71139e-10							EM47	3.8443e-11	4.2665e-11	-4.222e-12							EM47	3.47015e-10	1.16385e-09	-8.16834e-10								EM47	0.754063	0.757361	-0.00329788							EM47	0.736081	0.607762	0.128319
			EM48	7e-15	4.6e-14	-3.9e-14							EM48	4e-15	5e-15	-1e-15							EM48	3.6e-14	1.27e-13	-9.1e-14								EM48	0	0	0							EM48	0	0	0
			EM49	7e-15	4.6e-14	-3.9e-14							EM49	4e-15	5e-15	-1e-15							EM49	3.6e-14	1.27e-13	-9.1e-14								EM49	0	0	0							EM49	0	0	0
			EM50	1e-15	9e-15	-8e-15							EM50	1e-15	1e-15	0							EM50	7e-15	2.6e-14	-1.9e-14								EM50	0	0	0							EM50	0	0	0
			EM51	1.3e-14	8.7e-14	-7.4e-14							EM51	8e-15	9e-15	-1e-15							EM51	7e-14	2.34e-13	-1.64e-13								EM51	0	0	0							EM51	0	0	0
			EM52	1.7e-14	1.12e-13	-9.5e-14							EM52	1e-14	1.2e-14	-2e-15							EM52	9.1e-14	3.11e-13	-2.2e-13								EM52	0	0	0							EM52	0	0	0
			EM53	4e-15	3e-14	-2.6e-14							EM53	2e-15	3e-15	-1e-15							EM53	2.3e-14	7.6e-14	-5.3e-14								EM53	0	0	0							EM53	0	0	0
			EM54	1.6e-14	1.06e-13	-9e-14							EM54	9e-15	1.1e-14	-2e-15							EM54	8.4e-14	2.86e-13	-2.02e-13								EM54	0	0	0							EM54	0	0	0
			EM55	0.0792947	0.101932	-0.0226376							EM55	0.0805391	0.115852	-0.0353132							EM55	0.106889	0.10141	0.00547902								EM55	0.86205	0.819297	0.0427536							EM55	0.840359	0.629118	0.211241
			EM56	8.242e-12	5.7285e-11	-4.9043e-11							EM56	4.868e-12	6.031e-12	-1.163e-12							EM56	4.5638e-11	1.43558e-10	-9.792e-11								EM56	0.0653957	0.0646931	0.000702594							EM56	0.0611121	0.0332206	0.0278915
			EM57	8.242e-12	5.7285e-11	-4.9043e-11							EM57	4.868e-12	6.031e-12	-1.163e-12							EM57	4.5638e-11	1.43558e-10	-9.792e-11								EM57	0.0653957	0.0646931	0.000702594							EM57	0.0611121	0.0332206	0.0278915
			EM58	3.6e-14	2.63e-13	-2.27e-13							EM58	2.3e-14	1.6e-14	7e-15							EM58	2.13e-13	1.2e-12	-9.87e-13								EM58	0	0	0							EM58	0	0	0
			EM59	6.559e-12	4.498e-11	-3.8421e-11							EM59	3.871e-12	4.771e-12	-9e-13							EM59	3.5951e-11	1.15946e-10	-7.9995e-11								EM59	0.0270221	0.0412264	-0.0142043							EM59	0.0328079	0.0627665	-0.0299586
			EM60	3.2268e-11	2.21204e-10	-1.88936e-10							EM60	1.9246e-11	2.1647e-11	-2.401e-12							EM60	1.76255e-10	5.8064e-10	-4.04385e-10								EM60	0.757575	0.727452	0.0301226							EM60	0.745936	0.623747	0.122189
			EM61	6.559e-12	4.498e-11	-3.8421e-11							EM61	3.871e-12	4.771e-12	-9e-13							EM61	3.5951e-11	1.15946e-10	-7.9995e-11								EM61	0.0270221	0.0412264	-0.0142043							EM61	0.0328079	0.0627665	-0.0299586
			EM62	5.4e-14	3.62e-13	-3.08e-13							EM62	3.2e-14	3.7e-14	-5e-15							EM62	2.89e-13	1e-12	-7.11e-13								EM62	0	0	0							EM62	0	0	0
			EM63	1.2e-14	8.4e-14	-7.2e-14							EM63	7e-15	9e-15	-2e-15							EM63	6.8e-14	2.2e-13	-1.52e-13								EM63	0	0	0							EM63	0	0	0
			EM64	1.6e-14	1.04e-13	-8.8e-14							EM64	9e-15	1.1e-14	-2e-15							EM64	8.4e-14	2.95e-13	-2.11e-13								EM64	0	0	0							EM64	0	0	0
			EM65	1.1e-14	7.3e-14	-6.2e-14							EM65	7e-15	8e-15	-1e-15							EM65	5.9e-14	1.79e-13	-1.2e-13								EM65	0	0	0							EM65	0	0	0
			EM66	8e-15	5.1e-14	-4.3e-14							EM66	5e-15	5e-15	0							EM66	4.2e-14	1.46e-13	-1.04e-13								EM66	0	0	0							EM66	0	0	0
			EM67	6e-15	4.2e-14	-3.6e-14							EM67	4e-15	4e-15	0							EM67	3.4e-14	1.21e-13	-8.7e-14								EM67	0	0	0							EM67	0	0	0
[truncated: 41 more columns]

## Sheet: Addition of acetic acid
Flux variability analysis
Addition of acetic acid (Acidogenesis)
*Biomass (Objective Function)										Acetic acid										Butyric acid (Objective Function)
Original Network			Elementary Modes				External Metabolites			Original Network			Elementary Modes				External Metabolites			Original Network			Elementary Modes				External Metabolites
	Max	Min		Max	Min	Max-Min		Max	Min		Max	Min		Max	Min	Max-Min		Max	Min		Max	Min		Max	Min	Max-Min
Reaction	Flux (mM/Lh)	Flux (mM/Lh)	EM_MAIN	Flux (mM/Lh)	Flux (mM/Lh)		EXTERNAL METABOLITE	Accumulation rate (mM/h)	Accumulation rate (mM/h)	Reaction	Flux (mM/Lh)	Flux (mM/Lh)	EM_MAIN	Flux (mM/Lh)	Flux (mM/Lh)		EXTERNAL METABOLITE	Accumulation rate (mM/h)	Accumulation rate (mM/h)	Reaction	Flux (mM/Lh)	Flux (mM/Lh)	EM_MAIN	Flux (mM/Lh)	Flux (mM/Lh)		EXTERNAL METABOLITE	Accumulation rate (mM/h)	Accumulation rate (mM/h)
AD1	71.8531	71.8531	EM1	0.00855448	0.00431192	0.00424256	H2	22.3425	22.3425	AD1	71.8531	71.8531	EM1	0.00304502	2.80509e-05	0.00301697	H2	22.3425	22.3425	AD1	71.8531	71.8531	EM1	0.00778021	0.00317254	0.00460768	H2	22.3425	22.3425
APP1	80.8737	80.8737	EM2	0.00154336	0.00176027	-0.000216906	*Biomass	60.7	60.7	APP1	80.8737	80.8737	EM2	0.00256513	0.00441279	-0.00184766	*Biomass	60.7	60.7	APP1	80.8737	80.8737	EM2	0.000540997	0.00214632	-0.00160532	*Biomass	60.7	60.7
APP2	80.8737	80.8737	EM3	8.42424	3.05451	5.36973	CO2	215.805	215.805	APP2	80.8737	80.8737	EM3	3.21898	4.39026	-1.17129	CO2	215.805	215.805	APP2	80.8737	80.8737	EM3	10.7555	2.33809	8.41741	CO2	215.805	215.805
APP3	80.8737	80.8737	EM4	1.54162	0.888195	0.653429	Acetate	0	0	APP3	80.8737	80.8737	EM4	1.00015	1.08071	-0.080553	Acetate	0	0	APP3	80.8737	80.8737	EM4	0.023325	0.858287	-0.834962	Acetate	0	0
APP4	80.8737	80.8737	EM5	0.00038279	0.00114454	-0.00076175	Butyrate	80.8737	80.8737	APP4	80.8737	80.8737	EM5	0.00107598	0.000940307	0.000135668	Butyrate	80.8737	80.8737	APP4	80.8737	80.8737	EM5	0.00093859	0.001218	-0.000279406	Butyrate	80.8737	80.8737
APP6	0	0	EM6	1.4451e-10	1.56369e-09	-1.41918e-09	Acetone	0	0	APP6	0	0	EM6	0	1.20369e-10	-1.20369e-10	Acetone	0	0	APP6	0	0	EM6	9.26e-13	2.70172e-09	-2.70079e-09	Acetone	0	0
APP7	0	0	EM7	1.8767e-11	3.21287e-10	-3.0252e-10	Ethanol	0	0	APP7	0	0	EM7	0	2.2043e-11	-2.2043e-11	Ethanol	0	0	APP7	0	0	EM7	3.4e-14	5.90516e-10	-5.90482e-10	Ethanol	0	0
APP8	80.8737	80.8737	EM8	1.7524e-11	3.42509e-10	-3.24985e-10	Butanol	0	0	APP8	80.8737	80.8737	EM8	0	2.0583e-11	-2.0583e-11	Butanol	0	0	APP8	80.8737	80.8737	EM8	5.1e-14	7.23973e-10	-7.23922e-10	Butanol	0	0
APP9	80.8737	80.8737	EM9	3.2395e-11	2.86117e-10	-2.53722e-10	H2O	192.111	192.111	APP9	80.8737	80.8737	EM9	0	3.3343e-11	-3.3343e-11	H2O	192.111	192.111	APP9	80.8737	80.8737	EM9	2.51e-13	7.03336e-10	-7.03085e-10	H2O	192.111	192.111
BP1	0.02711	0.02711	EM10	4.5634e-11	4.8878e-11	-3.244e-12	Glucose	100	100	BP1	0.02711	0.02711	EM10	0	2.6449e-11	-2.6449e-11	Glucose	100	100	BP1	0.02711	0.02711	EM10	7.05e-13	1.01656e-09	-1.01586e-09	Glucose	100	100
EM1	22.3425	22.3425	EM11	1.4883e-11	1.96416e-10	-1.81533e-10				EM1	22.3425	22.3425	EM11	0	1.8869e-11	-1.8869e-11				EM1	22.3425	22.3425	EM11	2.4e-14	3.65177e-10	-3.65153e-10
EM10	60.7	60.7	EM12	3.7324e-11	4.9179e-10	-4.54466e-10	Biomass is an objective function for all calculation in this sheet with a .			EM10	60.7	60.7	EM12	0	4.6336e-11	-4.6336e-11				EM10	60.7	60.7	EM12	3.23e-13	1.11338e-09	-1.11305e-09
EM3	215.805	215.805	EM13	1.4192e-11	2.05571e-10	-1.91379e-10	fixed flux value.			EM3	215.805	215.805	EM13	0	1.906e-11	-1.906e-11				EM3	215.805	215.805	EM13	2.7e-14	4.03442e-10	-4.03415e-10
EM4	0	0	EM14	1.8767e-11	3.21287e-10	-3.0252e-10				EM4	0	0	EM14	0	2.2043e-11	-2.2043e-11				EM4	0	0	EM14	3.4e-14	5.90516e-10	-5.90482e-10
EM5	80.8737	80.8737	EM15	3.2395e-11	2.86117e-10	-2.53722e-10	Max - maximizing the flux of a specific metabolite when biomass is an objective			EM5	80.8737	80.8737	EM15	0	3.3343e-11	-3.3343e-11				EM5	80.8737	80.8737	EM15	2.51e-13	7.03336e-10	-7.03085e-10
EM6	0	0	EM16	1.4883e-11	1.96416e-10	-1.81533e-10	function with fixed flux value.			EM6	0	0	EM16	0	1.8869e-11	-1.8869e-11				EM6	0	0	EM16	2.4e-14	3.65177e-10	-3.65153e-10
EM7	0	0	EM17	1.4192e-11	2.05571e-10	-1.91379e-10				EM7	0	0	EM17	0	1.906e-11	-1.906e-11				EM7	0	0	EM17	2.7e-14	4.03442e-10	-4.03415e-10
EM8	0	0	EM18	1.9961e-11	2.27626e-10	-2.07665e-10	Min - minimizing the flux of a specific metabolite when biomass is an objective			EM8	0	0	EM18	0	2.186e-11	-2.186e-11				EM8	0	0	EM18	1.23e-13	7.50836e-10	-7.50713e-10
EM9	192.111	192.111	EM19	2.7175e-11	1.86292e-10	-1.59117e-10	function with fixed flux value.			EM9	192.111	192.111	EM19	0	2.7074e-11	-2.7074e-11				EM9	192.111	192.111	EM19	2.61e-13	7.62494e-10	-7.62233e-10
EMP1	100	100	EM20	3.524e-12	5.9898e-11	-5.6374e-11				EMP1	100	100	EM20	0	3.882e-12	-3.882e-12				EMP1	100	100	EM20	6e-15	1.18965e-10	-1.18959e-10
EMP2	100	100	EM21	1.3876e-11	2.00152e-10	-1.86276e-10	Observation:			EMP2	100	100	EM21	0	1.5647e-11	-1.5647e-11				EMP2	100	100	EM21	1e-13	4.89187e-10	-4.89087e-10
EMP3	97.7227	97.7227	EM22	1.2357e-11	3.6579e-11	-2.4222e-11	Flux distribution of original network is unique and there is variation in			EMP3	97.7227	97.7227	EM22	0	1.2802e-11	-1.2802e-11				EMP3	97.7227	97.7227	EM22	9e-14	2.61097e-10	-2.61007e-10
EMP4	97.7227	97.7227	EM23	2.916e-12	3.866e-11	-3.5744e-11	sets of flux values in EMs (comparison is based on maximizing and			EMP4	97.7227	97.7227	EM23	0	3.653e-12	-3.653e-12				EMP4	97.7227	97.7227	EM23	4e-15	7.3148e-11	-7.3144e-11
EMP5	194.307	194.307	EM24	6.879e-12	6.9853e-11	-6.2974e-11	minimizing a specific metabolite when flux value of biomass was fixed)			EMP5	194.307	194.307	EM24	0	1.0085e-11	-1.0085e-11				EMP5	194.307	194.307	EM24	3.7e-14	1.84429e-10	-1.84392e-10
EMP6	192.111	192.111	EM25	1.9961e-11	2.27626e-10	-2.07665e-10				EMP6	192.111	192.111	EM25	0	2.186e-11	-2.186e-11				EMP6	192.111	192.111	EM25	1.23e-13	7.50836e-10	-7.50713e-10
EMP7	86.3635	86.3635	EM26	3.524e-12	5.9898e-11	-5.6374e-11	Note: This methodology is adapted from Mahadevan and Schilling_2003 to			EMP7	86.3635	86.3635	EM26	0	3.882e-12	-3.882e-12				EMP7	86.3635	86.3635	EM26	6e-15	1.18965e-10	-1.18959e-10
HPP1	170.965	170.965	EM27	1.2357e-11	3.6579e-11	-2.4222e-11	calculate the flux variability wherein the same optimal objective.			HPP1	170.965	170.965	EM27	0	1.2802e-11	-1.2802e-11				HPP1	170.965	170.965	EM27	9e-14	2.61097e-10	-2.61007e-10
HPP2	81.331	81.331	EM28	2.916e-12	3.866e-11	-3.5744e-11				HPP2	81.331	81.331	EM28	0	3.653e-12	-3.653e-12				HPP2	81.331	81.331	EM28	4e-15	7.3148e-11	-7.3144e-11
HPP3	67.2914	67.2914	EM29	1.3e-14	2.74e-13	-2.61e-13				HPP3	67.2914	67.2914	EM29	0	1.5e-14	-1.5e-14				HPP3	67.2914	67.2914	EM29	0	5.81e-13	-5.81e-13
HPP4	22.3425	22.3425	EM30	4e-15	7.4e-14	-7e-14				HPP4	22.3425	22.3425	EM30	0	4e-15	-4e-15				HPP4	22.3425	22.3425	EM30	0	1.57e-13	-1.57e-13
PPP2	2.27727	2.27727	EM31	2.28467e-10	2.12839e-09	-1.89992e-09				PPP2	2.27727	2.27727	EM31	0	2.53871e-10	-2.53871e-10				PPP2	2.27727	2.27727	EM31	2.077e-12	3.97673e-09	-3.97465e-09
PPP3	-2.27727	-2.27727	EM32	3.2e-14	5e-13	-4.68e-13				PPP3	-2.27727	-2.27727	EM32	0	3.6e-14	-3.6e-14				PPP3	-2.27727	-2.27727	EM32	0	1.032e-12	-1.032e-12
PPP4	-1.13863	-1.13863	EM33	5e-15	7e-14	-6.5e-14				PPP4	-1.13863	-1.13863	EM33	0	6e-15	-6e-15				PPP4	-1.13863	-1.13863	EM33	0	1.44e-13	-1.44e-13
PPP5	-1.13863	-1.13863	EM34	4e-15	7.4e-14	-7e-14				PPP5	-1.13863	-1.13863	EM34	0	4e-15	-4e-15				PPP5	-1.13863	-1.13863	EM34	0	1.57e-13	-1.57e-13
PPP6	-1.13863	-1.13863	EM35	5e-15	7e-14	-6.5e-14				PPP6	-1.13863	-1.13863	EM35	0	6e-15	-6e-15				PPP6	-1.13863	-1.13863	EM35	0	1.44e-13	-1.44e-13
SPP1	0	0	EM36	3.4496e-11	1.6202e-10	-1.27524e-10				SPP1	0	0	EM36	0	3.3796e-11	-3.3796e-11				SPP1	0	0	EM36	1.79e-13	1.9569e-09	-1.95672e-09
SPP2	0	0	EM37	3.8e-14	1.003e-12	-9.65e-13				SPP2	0	0	EM37	0	4.4e-14	-4.4e-14				SPP2	0	0	EM37	0	1.76e-13	-1.76e-13
SPP3	0	0	EM38	1e-15	2.7e-14	-2.6e-14				SPP3	0	0	EM38	0	2e-15	-2e-15				SPP3	0	0	EM38	0	6.3e-14	-6.3e-14
SPP4	0	0	EM39	7.9638e-11	1.60832e-09	-1.52869e-09				SPP4	0	0	EM39	0	9.456e-11	-9.456e-11				SPP4	0	0	EM39	9.07e-13	1.85663e-09	-1.85572e-09
SPP5	0	0	EM40	1.8e-14	1.97e-13	-1.79e-13				SPP5	0	0	EM40	0	1.7e-14	-1.7e-14				SPP5	0	0	EM40	0	2.33e-13	-2.33e-13
SPP6	0	0	EM41	1e-15	1.4e-14	-1.3e-14				SPP6	0	0	EM41	0	1e-15	-1e-15				SPP6	0	0	EM41	0	3.4e-14	-3.4e-14
SPP7	0	0	EM42	1.07789e-10	2.12475e-09	-2.01696e-09				SPP7	0	0	EM42	0	1.27725e-10	-1.27725e-10				SPP7	0	0	EM42	1.17e-13	6.35969e-09	-6.35957e-09
			EM43	1.96e-13	1.079e-11	-1.0594e-11							EM43	0	5.5e-14	-5.5e-14							EM43	7e-15	1.3349e-11	-1.3342e-11
			EM44	1.96e-13	1.079e-11	-1.0594e-11							EM44	0	5.5e-14	-5.5e-14							EM44	7e-15	1.3349e-11	-1.3342e-11
			EM45	1e-15	2.7e-14	-2.6e-14							EM45	0	2e-15	-2e-15							EM45	0	6.3e-14	-6.3e-14
			EM46	5.0019e-11	6.7922e-11	-1.7903e-11							EM46	0	9.8181e-11	-9.8181e-11							EM46	4.8e-14	7.9663e-11	-7.9615e-11
			EM47	5.0019e-11	6.7922e-11	-1.7903e-11							EM47	0	9.8181e-11	-9.8181e-11							EM47	4.8e-14	7.9663e-11	-7.9615e-11
			EM48	5e-15	1.8e-14	-1.3e-14							EM48	0	6e-15	-6e-15							EM48	0	9.8e-14	-9.8e-14
			EM49	5e-15	1.8e-14	-1.3e-14							EM49	0	6e-15	-6e-15							EM49	0	9.8e-14	-9.8e-14
			EM50	1e-15	1.4e-14	-1.3e-14							EM50	0	1e-15	-1e-15							EM50	0	3.4e-14	-3.4e-14
			EM51	1e-14	1.87e-13	-1.77e-13							EM51	0	1.2e-14	-1.2e-14							EM51	0	3.79e-13	-3.79e-13
			EM52	1.3e-14	1.69e-13	-1.56e-13							EM52	0	1.6e-14	-1.6e-14							EM52	0	3.39e-13	-3.39e-13
			EM53	3e-15	5.9e-14	-5.6e-14							EM53	0	4e-15	-4e-15							EM53	0	1.29e-13	-1.29e-13
			EM54	1.2e-14	1.55e-13	-1.43e-13							EM54	0	1.5e-14	-1.5e-14							EM54	0	3.22e-13	-3.22e-13
			EM55	3.51485	6.53408	-3.01923							EM55	6.38883	5.98316	0.405668							EM55	4.57295	6.89082	-2.31787
			EM56	6.244e-12	1.03316e-10	-9.7072e-11							EM56	0	3.2e-12	-3.2e-12							EM56	9e-15	1.8194e-10	-1.81931e-10
			EM57	6.244e-12	1.03316e-10	-9.7072e-11							EM57	0	3.2e-12	-3.2e-12							EM57	9e-15	1.8194e-10	-1.81931e-10
			EM58	2.11e-13	1.568e-12	-1.357e-12							EM58	0	8.6e-14	-8.6e-14							EM58	5e-15	6.09e-12	-6.085e-12
			EM59	5.006e-12	6.1775e-11	-5.6769e-11							EM59	0	5.467e-12	-5.467e-12							EM59	7e-15	1.13493e-10	-1.13486e-10
			EM60	2.523e-11	1.38637e-10	-1.13407e-10							EM60	0	3.8331e-11	-3.8331e-11							EM60	1.9e-14	3.5159e-10	-3.51571e-10
			EM61	5.006e-12	6.1775e-11	-5.6769e-11							EM61	0	5.467e-12	-5.467e-12							EM61	7e-15	1.13493e-10	-1.13486e-10
			EM62	4.2e-14	3.35e-13	-2.93e-13							EM62	0	6.4e-14	-6.4e-14							EM62	0	9.12e-13	-9.12e-13
			EM63	1e-14	1.88e-13	-1.78e-13							EM63	0	1.2e-14	-1.2e-14							EM63	0	4.07e-13	-4.07e-13
			EM64	1.2e-14	1.9e-13	-1.78e-13							EM64	0	1.5e-14	-1.5e-14							EM64	0	4.54e-13	-4.54e-13
			EM65	8e-15	1.61e-13	-1.53e-13							EM65	0	1e-14	-1e-14							EM65	0	3.55e-13	-3.55e-13
			EM66	6e-15	9.5e-14	-8.9e-14							EM66	0	7e-15	-7e-15							EM66	0	2.25e-13	-2.25e-13
			EM67	5e-15	7.9e-14	-7.4e-14							EM67	0	6e-15	-6e-15							EM67	0	1.73e-13	-1.73e-13

## Sheet: Addition of butyric acid
Flux variability analysis
Addition of butyric acid (Acidogenesis)																															Addition of butyric acid (Solventogenesis)
*Biomass (Objective Function)										Acetic acid										Butyric acid (Objective Function)											*Biomass (Objective function)										Acetic acid
Original Network			Elementary Modes				External Metabolites			Original Network			Elementary Modes				External Metabolites			Original Network			Elementary Modes				External Metabolites				Original Network			Elementary Modes				External Metabolites			Original Network			Elementary Modes				External Metabolites
	Max	Min		Max	Min	Max-Min		Max	Min		Max	Min		Max	Min	Max-Min		Max	Min		Max	Min		Max	Min	Max-Min						Max	Min		Max	Min	Max-Min		Max	Min		Max	Min		Max	Min	Max-Min		Max
Reaction	Flux (mM/Lh)	Flux (mM/Lh)	EM_MAIN	Flux (mM/Lh)	Flux (mM/Lh)		EXTERNAL METABOLITE	Accumulation rate (mM/h)	Accumulation rate (mM/h)	Reaction	Flux (mM/Lh)	Flux (mM/Lh)	EM_MAIN	Flux (mM/Lh)	Flux (mM/Lh)		EXTERNAL METABOLITE	Accumulation rate (mM/h)	Accumulation rate (mM/h)	Reaction	Flux (mM/Lh)	Flux (mM/Lh)	EM_MAIN	Flux (mM/Lh)	Flux (mM/Lh)		EXTERNAL METABOLITE	Accumulation rate (mM/h)	Accumulation rate (mM/h)		Reaction	Flux (mM/Lh)	Flux (mM/Lh)	EM_MAIN	Flux (mM/Lh)	Flux (mM/Lh)		EXTERNAL METABOLITE	Accumulation rate (mM/h)	Accumulation rate (mM/h)	Reaction	Flux (mM/Lh)	Flux (mM/Lh)	EM_MAIN	Flux (mM/Lh)	Flux (mM/Lh)		EXTERNAL METABOLITE	Accumulation rate (mM/h)
AD1	16.0829	16.0829	EM1	0.000123243	1.81456e-06	0.000121428	H2	52.9611	52.9611	AD1	16.0829	16.0829	EM1	3.91547e-05	8.98733e-05	-5.07186e-05	H2	52.9611	52.9611	AD1	16.0829	16.0829	EM1	2.82475e-07	1.60787e-05	-1.57962e-05	H2	52.9611	52.9611		AD1	98.1774	98.1774	EM1	1.5396e-07	4.4574e-07	-2.9178e-07	H2	135.479	135.479	AD1	98.1774	98.1774	EM1	5.46028e-07	1.93165e-06	-1.38563e-06	H2	135.479
APP1	55.9848	55.9848	EM2	2.31926e-05	8.8026e-05	-6.48334e-05	*Biomass	80.5	80.5	APP1	55.9848	55.9848	EM2	7.35471e-05	2.29214e-05	5.06257e-05	*Biomass	80.5	80.5	APP1	55.9848	55.9848	EM2	8.75533e-05	4.90901e-05	3.84632e-05	*Biomass	80.5	80.5		APP1	78.1716	78.1716	EM2	2.35098e-07	1.66871e-07	6.82271e-08	*Biomass	35	35	APP1	78.1716	78.1716	EM2	2.76086e-07	2.09726e-07	6.63606e-08	*Biomass	35
APP2	55.9848	55.9848	EM3	0.0504068	0.0568547	-0.00644789	CO2	220.961	220.961	APP2	55.9848	55.9848	EM3	0.0394786	0.131578	-0.0920997	CO2	220.961	220.961	APP2	55.9848	55.9848	EM3	0.0510882	0.130954	-0.0798654	CO2	220.961	220.961		APP2	8.17164	8.17164	EM3	0.00730377	0.00477008	0.00253369	CO2	279.113	279.113	APP2	8.17164	8.17164	EM3	0.00515754	0.00200686	0.00315068	CO2	279.113
APP3	55.9848	55.9848	EM4	1.57924	1.58152	-0.00227454	Acetate	37.3	37.3	APP3	55.9848	55.9848	EM4	1.58782	1.55193	0.0358932	Acetate	37.3	37.3	APP3	55.9848	55.9848	EM4	1.58147	1.54331	0.0381624	Acetate	37.3	37.3		APP3	8.17164	8.17164	EM4	0.000327572	0.000777957	-0.000450385	Acetate	18.6	18.6	APP3	8.17164	8.17164	EM4	0.000325435	0.000290611	3.48243e-05	Acetate	18.6
APP4	55.9848	55.9848	EM5	0.00356143	0.00355978	1.64768e-06	Butyrate	55.9848	55.9848	APP4	55.9848	55.9848	EM5	0.00355811	0.00356821	-1.01066e-05	Butyrate	55.9848	55.9848	APP4	55.9848	55.9848	EM5	0.00356028	0.0035725	-1.2226e-05	Butyrate	55.9848	55.9848		APP4	8.17164	8.17164	EM5	4.70533e-08	1.16658e-07	-6.96048e-08	Butyrate	-69.9	-69.9	APP4	8.17164	8.17164	EM5	3.346e-08	2.37176e-08	9.74236e-09	Butyrate	-69.9
APP6	37.3	37.3	EM6	3e-15	4.11975e-09	-4.11975e-09	Acetone	0	0	APP6	37.3	37.3	EM6	1.56023e-09	1.76387e-10	1.38385e-09	Acetone	0	0	APP6	37.3	37.3	EM6	3e-15	0	3e-15	Acetone	0	0		APP6	18.6388	18.6408	EM6	0.0718542	0.102968	-0.0311137	Acetone	70	70	APP6	18.6398	18.6398	EM6	0.0948424	0.0531775	0.0416649	Acetone	70
APP7	37.3	37.3	EM7	1e-15	5.17412e-10	-5.17411e-10	Ethanol	0	0	APP7	37.3	37.3	EM7	1.9832e-10	1.9664e-11	1.78656e-10	Ethanol	0	0	APP7	37.3	37.3	EM7	0	1e-15	-1e-15	Ethanol	0	0		APP7	18.6388	18.6408	EM7	0.00128012	0.00102757	0.000252546	Ethanol	3	3	APP7	18.6398	18.6398	EM7	0.00133495	0.00138511	-5.01534e-05	Ethanol	3
APP8	55.9848	55.9848	EM8	1e-15	4.04468e-10	-4.04467e-10	Butanol	0	0	APP8	55.9848	55.9848	EM8	1.33204e-10	1.7934e-11	1.1527e-10	Butanol	0	0	APP8	55.9848	55.9848	EM8	0	1e-15	-1e-15	Butanol	0	0		APP8	0.061163	0.059191	EM8	0.0495682	0.0479136	0.00165463	Butanol	78.0716	78.0716	APP8	0.060243	0.060243	EM8	0.0304588	0.0192695	0.0111893	Butanol	78.0716
APP9	55.9848	55.9848	EM9	1e-15	6.8963e-10	-6.89629e-10	H2O	189.538	189.538	APP9	55.9848	55.9848	EM9	3.38587e-10	5.947e-11	2.79117e-10	H2O	189.538	189.538	APP9	55.9848	55.9848	EM9	0	1e-15	-1e-15	H2O	189.538	189.538		APP9	0.061163	0.059191	EM9	0.000889684	0.000335324	0.00055436	H2O	195.451	195.451	APP9	0.060243	0.060243	EM9	0.000680588	0.00118787	-0.000507284	H2O	195.451
BP1	0.035954	0.035954	EM10	1e-15	3.37215e-10	-3.37214e-10	Glucose	100	100	BP1	0.035954	0.035954	EM10	3.26617e-10	5.1265e-11	2.75352e-10	Glucose	100	100	BP1	0.035954	0.035954	EM10	0	2e-15	-2e-15	Glucose	100	100		BP1	0.015632	0.015632	EM10	41.5204	42.9893	-1.46893	Glucose	100	100	BP1	0.015632	0.015632	EM10	46.2936	47.207	-0.913367	Glucose	100
EM1	52.9611	52.9611	EM11	0	3.81174e-10	-3.81174e-10				EM1	52.9611	52.9611	EM11	1.50149e-10	1.4056e-11	1.36093e-10				EM1	52.9611	52.9611	EM11	0	0	0					EM1	135.479	135.479	EM11	0.000214439	0.000511193	-0.000296755				EM1	135.479	135.479	EM11	0.000169529	0.000257985	-8.84569e-05
EM10	80.5	80.5	EM12	1e-15	9.87571e-10	-9.8757e-10	Biomass is an objective function for all calculation in this sheet with a .			EM10	80.5	80.5	EM12	3.95528e-10	6.5112e-11	3.30416e-10				EM10	80.5	80.5	EM12	1e-15	1e-15	0					EM10	35	35	EM12	0.000196191	0.000168991	2.72003e-05				EM10	35	35	EM12	0.000165297	0.00165006	-0.00148476
EM3	220.961	220.961	EM13	0	3.41231e-10	-3.41231e-10	fixed flux value.			EM3	220.961	220.961	EM13	1.35577e-10	1.3711e-11	1.21866e-10				EM3	220.961	220.961	EM13	0	0	0					EM3	279.113	279.113	EM13	0.000343396	0.000803344	-0.000459947				EM3	279.113	279.113	EM13	0.000286073	0.000271729	1.43443e-05
EM4	37.3	37.3	EM14	1e-15	5.17412e-10	-5.17411e-10				EM4	37.3	37.3	EM14	1.9832e-10	1.9664e-11	1.78656e-10				EM4	37.3	37.3	EM14	0	1e-15	-1e-15					EM4	18.6	18.6	EM14	0.00128012	0.00102757	0.000252546				EM4	18.6	18.6	EM14	0.00133495	0.00138511	-5.01534e-05
EM5	55.9848	55.9848	EM15	1e-15	6.8963e-10	-6.89629e-10	Max - maximizing the flux of a specific metabolite when biomass is an objective			EM5	55.9848	55.9848	EM15	3.38587e-10	5.947e-11	2.79117e-10				EM5	55.9848	55.9848	EM15	0	1e-15	-1e-15					EM5	-69.9	-69.9	EM15	0.000889684	0.000335324	0.00055436				EM5	-69.9	-69.9	EM15	0.000680588	0.00118787	-0.000507284
EM6	0	0	EM16	0	3.81174e-10	-3.81174e-10	function with fixed flux value.			EM6	0	0	EM16	1.50149e-10	1.4056e-11	1.36093e-10				EM6	0	0	EM16	0	0	0					EM6	70	70	EM16	0.000214439	0.000511193	-0.000296755				EM6	70	70	EM16	0.000169529	0.000257985	-8.84569e-05
EM7	0	0	EM17	0	3.41231e-10	-3.41231e-10				EM7	0	0	EM17	1.35577e-10	1.3711e-11	1.21866e-10				EM7	0	0	EM17	0	0	0					EM7	3	3	EM17	0.000343396	0.000803344	-0.000459947				EM7	3	3	EM17	0.000286073	0.000271729	1.43443e-05
EM8	0	0	EM18	1e-15	6.66374e-10	-6.66373e-10	Min - minimizing the flux of a specific metabolite when biomass is an objective			EM8	0	0	EM18	2.69324e-10	3.0017e-11	2.39307e-10				EM8	0	0	EM18	1e-15	1e-15	0					EM8	78.0716	78.0716	EM18	0.00514015	0.00364624	0.00149392				EM8	78.0716	78.0716	EM18	0.00512024	0.00265848	0.00246177
EM9	189.538	189.538	EM19	1e-15	9.13983e-10	-9.13982e-10	function with fixed flux value.			EM9	189.538	189.538	EM19	2.91435e-10	4.0213e-11	2.51222e-10				EM9	189.538	189.538	EM19	1e-15	1e-15	0					EM9	195.451	195.451	EM19	0.0173145	0.0176866	-0.000372058				EM9	195.451	195.451	EM19	0.0198542	0.00885584	0.0109983
EMP1	100	100	EM20	0	9.6472e-11	-9.6472e-11				EMP1	100	100	EM20	3.6917e-11	3.48e-12	3.3437e-11				EMP1	100	100	EM20	0	0	0					EMP1	100	100	EM20	0.000209369	0.000143847	6.55215e-05				EMP1	100	100	EM20	0.00020547	0.000158824	4.66453e-05
EMP2	100	100	EM21	0	5.05618e-10	-5.05618e-10	Observation:			EMP2	100	100	EM21	1.90014e-10	2.0757e-11	1.69257e-10				EMP2	100	100	EM21	0	1e-15	-1e-15					EMP2	100	100	EM21	0.00361984	0.00214983	0.00147001				EMP2	100	100	EM21	0.00371149	0.00202803	0.00168346
EMP3	96.9799	96.9799	EM22	0	2.8195e-10	-2.8195e-10	Flux distribution of original network is unique and there is variation in			EMP3	96.9799	96.9799	EM22	1.34472e-10	2.3339e-11	1.11133e-10				EMP3	96.9799	96.9799	EM22	0	0	0					EMP3	98.6869	98.6869	EM22	0.000202905	0.000495014	-0.000292109				EMP3	98.6869	98.6869	EM22	0.000203144	0.000188359	1.47845e-05
EMP4	96.9799	96.9799	EM23	0	7.4732e-11	-7.4732e-11	sets of flux values in EMs (comparison is based on maximizing and			EMP4	96.9799	96.9799	EM23	2.9203e-11	2.792e-12	2.6411e-11				EMP4	96.9799	96.9799	EM23	0	0	0					EMP4	98.6869	98.6869	EM23	4.29315e-05	0.000101262	-5.83305e-05				EMP4	98.6869	98.6869	EM23	3.51416e-05	2.77794e-05	7.36225e-06
EMP5	192.45	192.45	EM24	0	1.69745e-10	-1.69745e-10	minimizing a specific metabolite when flux value of biomass was fixed)			EMP5	192.45	192.45	EM24	7.2878e-11	9.345e-12	6.3533e-11				EMP5	192.45	192.45	EM24	0	0	0					EMP5	196.717	196.717	EM24	6.93402e-05	0.000260839	-0.000191498				EMP5	196.717	196.717	EM24	7.00467e-05	7.63268e-05	-6.28011e-06
EMP6	189.538	189.538	EM25	1e-15	6.66374e-10	-6.66373e-10				EMP6	189.538	189.538	EM25	2.69324e-10	3.0017e-11	2.39307e-10				EMP6	189.538	189.538	EM25	1e-15	1e-15	0					EMP6	195.451	195.451	EM25	0.00514015	0.00364624	0.00149392				EMP6	195.451	195.451	EM25	0.00512024	0.00265848	0.00246177
EMP7	81.9154	81.9154	EM26	0	9.6472e-11	-9.6472e-11	Note: This methodology is adapted from Mahadevan and Schilling_2003 to			EMP7	81.9154	81.9154	EM26	3.6917e-11	3.48e-12	3.3437e-11				EMP7	81.9154	81.9154	EM26	0	0	0					EMP7	92.1371	92.1371	EM26	0.000209369	0.000143847	6.55215e-05				EMP7	92.1371	92.1371	EM26	0.00020547	0.000158824	4.66453e-05
HPP1	161.494	161.494	EM27	0	2.8195e-10	-2.8195e-10	calculate the flux variability wherein the same optimal objective.			HPP1	161.494	161.494	EM27	1.34472e-10	2.3339e-11	1.11133e-10				HPP1	161.494	161.494	EM27	0	0	0					HPP1	183.258	183.258	EM27	0.000202905	0.000495014	-0.000292109				HPP1	183.258	183.258	EM27	0.000203144	0.000188359	1.47845e-05
HPP2	107.861	107.861	EM28	0	7.4732e-11	-7.4732e-11				HPP2	107.861	107.861	EM28	2.9203e-11	2.792e-12	2.6411e-11				HPP2	107.861	107.861	EM28	0	0	0					HPP2	46.8959	46.8959	EM28	4.29315e-05	0.000101262	-5.83305e-05				HPP2	46.8959	46.8959	EM28	3.51416e-05	2.77794e-05	7.36225e-06
HPP3	0.672041	0.672041	EM29	0	2.75e-13	-2.75e-13				HPP3	0.672041	0.672041	EM29	9.3e-14	1.1e-14	8.2e-14				HPP3	0.672041	0.672041	EM29	0	0	0					HPP3	0.883296	0.883296	EM29	3.28983e-06	4.66157e-06	-1.37174e-06				HPP3	0.883296	0.883296	EM29	4.69075e-06	9.77049e-06	-5.07974e-06
HPP4	52.9611	52.9611	EM30	0	8.8e-14	-8.8e-14				HPP4	52.9611	52.9611	EM30	3.1e-14	3e-15	2.8e-14				HPP4	52.9611	52.9611	EM30	0	0	0					HPP4	135.479	135.479	EM30	6.16499e-07	7.13962e-07	-9.74636e-08				HPP4	135.479	135.479	EM30	7.34238e-07	1.60469e-06	-8.70449e-07
PPP2	3.0201	3.0201	EM31	5e-15	3.86017e-09	-3.86016e-09				PPP2	3.0201	3.0201	EM31	1.68882e-09	1.99741e-10	1.48908e-09				PPP2	3.0201	3.0201	EM31	2e-15	1.5e-14	-1.3e-14					PPP2	1.31309	1.31309	EM31	0.735586	1.30324	-0.567649				PPP2	1.31309	1.31309	EM31	0.803643	0.161222	0.642421
PPP3	-3.0201	-3.0201	EM32	0	3.8e-13	-3.8e-13				PPP3	-3.0201	-3.0201	EM32	2.55e-13	2e-14	2.35e-13				PPP3	-3.0201	-3.0201	EM32	0	0	0					PPP3	-1.31309	-1.31309	EM32	0.000203236	0.000153481	4.97551e-05				PPP3	-1.31309	-1.31309	EM32	0.000212297	0.000310697	-9.83996e-05
PPP4	-1.51005	-1.51005	EM33	0	1.12e-13	-1.12e-13				PPP4	-1.51005	-1.51005	EM33	4.6e-14	5e-15	4.1e-14				PPP4	-1.51005	-1.51005	EM33	0	0	0					PPP4	-0.656543	-0.656543	EM33	1.05009e-07	1.81478e-07	-7.64687e-08				PPP4	-0.656543	-0.656543	EM33	1.13986e-07	4.05051e-07	-2.91065e-07
PPP5	-1.51005	-1.51005	EM34	0	8.8e-14	-8.8e-14				PPP5	-1.51005	-1.51005	EM34	3.1e-14	3e-15	2.8e-14				PPP5	-1.51005	-1.51005	EM34	0	0	0					PPP5	-0.656543	-0.656543	EM34	6.16499e-07	7.13962e-07	-9.74636e-08				PPP5	-0.656543	-0.656543	EM34	7.34238e-07	1.60469e-06	-8.70449e-07
PPP6	-1.51005	-1.51005	EM35	0	1.12e-13	-1.12e-13				PPP6	-1.51005	-1.51005	EM35	4.6e-14	5e-15	4.1e-14				PPP6	-1.51005	-1.51005	EM35	0	0	0					PPP6	-0.656543	-0.656543	EM35	1.05009e-07	1.81478e-07	-7.64687e-08				PPP6	-0.656543	-0.656543	EM35	1.13986e-07	4.05051e-07	-2.91065e-07
SPP1	0	0	EM36	1e-15	1.0693e-09	-1.0693e-09				SPP1	0	0	EM36	4.53063e-10	5.1682e-11	4.01381e-10				SPP1	0	0	EM36	1e-15	2e-15	-1e-15					SPP1	3	3	EM36	0.00859068	0.00910294	-0.000512256				SPP1	3	3	EM36	0.0089272	0.00399604	0.00493117
SPP2	0	0	EM37	0	5.49e-13	-5.49e-13				SPP2	0	0	EM37	1.44e-13	1.8e-14	1.26e-13				SPP2	0	0	EM37	0	0	0					SPP2	3	3	EM37	5.86904e-06	3.6973e-06	2.17174e-06				SPP2	3	3	EM37	5.91045e-06	2.14098e-05	-1.54993e-05
SPP3	0	0	EM38	0	3.6e-14	-3.6e-14				SPP3	0	0	EM38	1.2e-14	1e-15	1.1e-14				SPP3	0	0	EM38	0	0	0					SPP3	0.038837	0.040809	EM38	1.56651e-07	1.20625e-07	3.60259e-08				SPP3	0.039757	0.039757	EM38	1.57057e-07	2.00769e-07	-4.37119e-08
SPP4	0	0	EM39	2e-15	1.48622e-09	-1.48622e-09				SPP4	0	0	EM39	5.55079e-10	9.4298e-11	4.60781e-10				SPP4	0	0	EM39	1e-15	3e-15	-2e-15					SPP4	69.9612	69.9592	EM39	0.770086	0.479523	0.290563				SPP4	69.9602	69.9602	EM39	0.15743	0.183095	-0.0256648
SPP5	0	0	EM40	0	7.4e-14	-7.4e-14				SPP5	0	0	EM40	4.4e-14	1e-15	4.3e-14				SPP5	0	0	EM40	0	0	0					SPP5	70	70	EM40	0.000411361	0.000458338	-4.69773e-05				SPP5	70	70	EM40	0.000504623	0.000506912	-2.28825e-06
SPP6	0	0	EM41	0	2.3e-14	-2.3e-14				SPP6	0	0	EM41	8e-15	1e-15	7e-15				SPP6	0	0	EM41	0	0	0					SPP6	78.0716	78.0716	EM41	1.91668e-08	4.48966e-08	-2.57298e-08				SPP6	78.0716	78.0716	EM41	1.49784e-08	1.29584e-08	2.01999e-09
SPP7	0	0	EM42	4e-15	3.97545e-09	-3.97544e-09				SPP7	0	0	EM42	2.26572e-09	1.69276e-10	2.09645e-09				SPP7	0	0	EM42	3e-15	0	3e-15					SPP7	78.0716	78.0716	EM42	0.00932009	0.00609432	0.00322577				SPP7	78.0716	78.0716	EM42	0.00850447	0.00437158	0.00413289
			EM43	0	5.8e-14	-5.8e-14							EM43	1.9e-14	1e-15	1.8e-14							EM43	0	0	0								EM43	4.53357e-08	3.42143e-08	1.11215e-08							EM43	5.74707e-08	5.26175e-08	4.85313e-09
			EM44	0	5.8e-14	-5.8e-14							EM44	1.9e-14	1e-15	1.8e-14							EM44	0	0	0								EM44	4.53357e-08	3.42143e-08	1.11215e-08							EM44	5.74707e-08	5.26175e-08	4.85313e-09
			EM45	0	3.6e-14	-3.6e-14							EM45	1.2e-14	1e-15	1.1e-14							EM45	0	0	0								EM45	1.56651e-07	1.20625e-07	3.60259e-08							EM45	1.57057e-07	2.00769e-07	-4.37119e-08
			EM46	1e-15	1.03004e-09	-1.03004e-09							EM46	5.06812e-10	7.0091e-11	4.36721e-10							EM46	1e-15	1e-15	0								EM46	0.000177734	0.000529441	-0.000351708							EM46	0.000185022	0.000178453	6.56905e-06
			EM47	1e-15	1.03004e-09	-1.03004e-09							EM47	5.06812e-10	7.0091e-11	4.36721e-10							EM47	1e-15	1e-15	0								EM47	0.000177734	0.000529441	-0.000351708							EM47	0.000185022	0.000178453	6.56905e-06
			EM48	0	1.19e-13	-1.19e-13							EM48	5.2e-14	5e-15	4.7e-14							EM48	0	0	0								EM48	1.82925e-08	4.44573e-08	-2.61648e-08							EM48	1.46497e-08	1.30143e-08	1.63542e-09
			EM49	0	1.19e-13	-1.19e-13							EM49	5.2e-14	5e-15	4.7e-14							EM49	0	0	0								EM49	1.82925e-08	4.44573e-08	-2.61648e-08							EM49	1.46497e-08	1.30143e-08	1.63542e-09
			EM50	0	2.3e-14	-2.3e-14							EM50	8e-15	1e-15	7e-15							EM50	0	0	0								EM50	1.91668e-08	4.48966e-08	-2.57298e-08							EM50	1.49784e-08	1.29584e-08	2.01999e-09
			EM51	0	2.59e-13	-2.59e-13							EM51	9.4e-14	1e-14	8.4e-14							EM51	0	0	0								EM51	1.39755e-06	1.50685e-06	-1.09297e-07							EM51	1.58847e-06	2.69411e-06	-1.10564e-06
			EM52	0	3.05e-13	-3.05e-13							EM52	1.2e-13	1.2e-14	1.08e-13							EM52	0	0	0								EM52	2.03588e-07	3.68247e-07	-1.64659e-07							EM52	1.64888e-07	6.00728e-07	-4.3584e-07
			EM53	0	8.8e-14	-8.8e-14							EM53	3.2e-14	4e-15	2.8e-14							EM53	0	0	0								EM53	2.91022e-07	1.65045e-07	1.25976e-07							EM53	3.6124e-07	2.895e-07	7.17405e-08
			EM54	0	2.77e-13	-2.77e-13							EM54	1.1e-13	1.1e-14	9.9e-14							EM54	0	0	0								EM54	1.92804e-07	4.61851e-07	-2.69047e-07							EM54	1.65226e-07	1.34015e-07	3.12105e-08
			EM55	0.0119221	0.0120645	-0.000142417							EM55	0.00903919	0.0171113	-0.00807213							EM55	0.0143527	0.0314032	-0.0170505								EM55	0.00216411	0.00113368	0.00103043							EM55	0.00197804	0.000944131	0.00103391
			EM56	0	1.73954e-10	-1.73954e-10							EM56	6.4143e-11	5.075e-12	5.9068e-11							EM56	0	0	0								EM56	0.000137363	0.000111277	2.60856e-05							EM56	0.000150525	9.59442e-05	5.45811e-05
			EM57	0	1.73954e-10	-1.73954e-10							EM57	6.4143e-11	5.075e-12	5.9068e-11							EM57	0	0	0								EM57	0.000137363	0.000111277	2.60856e-05							EM57	0.000150525	9.59442e-05	5.45811e-05
			EM58	0	1.046e-12	-1.046e-12							EM58	1.6e-13	1.5e-14	1.45e-13							EM58	0	0	0								EM58	8.51122e-08	6.17151e-08	2.33971e-08							EM58	1.03093e-07	8.20225e-08	2.10703e-08
			EM59	0	1.29908e-10	-1.29908e-10							EM59	5.0309e-11	4.675e-12	4.5634e-11							EM59	0	0	0								EM59	5.7315e-05	0.000135419	-7.8104e-05							EM59	4.63476e-05	3.53842e-05	1.09634e-05
			EM60	1e-15	5.61181e-10	-5.6118e-10							EM60	2.53995e-10	4.105e-11	2.12945e-10							EM60	0	0	0								EM60	0.000114661	0.000401805	-0.000287144							EM60	0.000120217	0.000122551	-2.33338e-06
			EM61	0	1.29908e-10	-1.29908e-10							EM61	5.0309e-11	4.675e-12	4.5634e-11							EM61	0	0	0								EM61	5.7315e-05	0.000135419	-7.8104e-05							EM61	4.63476e-05	3.53842e-05	1.09634e-05
			EM62	0	9.16e-13	-9.16e-13							EM62	4.24e-13	3.5e-14	3.89e-13							EM62	0	0	0								EM62	2.37979e-07	5.83084e-07	-3.45105e-07							EM62	1.93568e-07	1.52296e-07	4.12715e-08
			EM63	0	2.29e-13	-2.29e-13							EM63	7.4e-14	1e-14	6.4e-14							EM63	0	0	0								EM63	5.02625e-06	7.63997e-06	-2.61372e-06							EM63	5.9355e-06	9.51292e-06	-3.57742e-06
			EM64	0	1.87e-13	-1.87e-13							EM64	9.2e-14	1.1e-14	8.1e-14							EM64	0	0	0								EM64	0.000932277	0.000294622	0.000637655							EM64	0.000490953	9.83263e-05	0.000392626
			EM65	0	1.87e-13	-1.87e-13							EM65	5.5e-14	8e-15	4.7e-14							EM65	0	0	0								EM65	8.07033e-06	6.29263e-06	1.7777e-06							EM65	7.912e-07	9.27755e-06	-8.48635e-06
			EM66	0	9.2e-14	-9.2e-14							EM66	4.4e-14	5e-15	3.9e-14							EM66	0	0	0								EM66	0.00113524	0.000942724	0.000192516							EM66	0.000769624	0.00042324	0.000346384
			EM67	0	8.1e-14	-8.1e-14							EM67	3.7e-14	4e-15	3.3e-14							EM67	0	0	0								EM67	0.00257318	0.00278222	-0.000209042							EM67	0.00240141	0.00271356	-0.000312152
[truncated: 41 more columns]

## Sheet: starting with 6.8->5.0
Flux variability analysis
Starting pH 6.8 and holding at 5.0 (Acidogenesis)																															Starting pH 6.8 and holding at 5.0 (Solventogenesis)
*Biomass (Objective Function)										Acetic acid										Butyric acid (Objective Function)											*Biomass (Objective function)										Acetic acid
Original Network			Elementary Modes				External Metabolites			Original Network			Elementary Modes				External Metabolites			Original Network			Elementary Modes				External Metabolites				Original Network			Elementary Modes				External Metabolites			Original Network			Elementary Modes				External Metabolites
	Max	Min		Max	Min	Max-Min		Max	Min		Max	Min		Max	Min	Max-Min		Max	Min		Max	Min		Max	Min	Max-Min						Max	Min		Max	Min	Max-Min		Max	Min		Max	Min		Max	Min	Max-Min		Max
Reaction	Flux (mM/Lh)	Flux (mM/Lh)	EM_MAIN	Flux (mM/Lh)	Flux (mM/Lh)		EXTERNAL METABOLITE	Accumulation rate (mM/h)	Accumulation rate (mM/h)	Reaction	Flux (mM/Lh)	Flux (mM/Lh)	EM_MAIN	Flux (mM/Lh)	Flux (mM/Lh)		EXTERNAL METABOLITE	Accumulation rate (mM/h)	Accumulation rate (mM/h)	Reaction	Flux (mM/Lh)	Flux (mM/Lh)	EM_MAIN	Flux (mM/Lh)	Flux (mM/Lh)		EXTERNAL METABOLITE	Accumulation rate (mM/h)	Accumulation rate (mM/h)		Reaction	Flux (mM/Lh)	Flux (mM/Lh)	EM_MAIN	Flux (mM/Lh)	Flux (mM/Lh)		EXTERNAL METABOLITE	Accumulation rate (mM/h)	Accumulation rate (mM/h)	Reaction	Flux (mM/Lh)	Flux (mM/Lh)	EM_MAIN	Flux (mM/Lh)	Flux (mM/Lh)		EXTERNAL METABOLITE	Accumulation rate (mM/h)
AD1	66.4755	66.4755	EM1	0.00250365	0.00191033	0.000593324	H2	57.7087	57.7087	AD1	66.4755	66.4755	EM1	0.00280051	0.00191033	0.000890183	H2	57.7087	57.7087	AD1	66.4755	66.4755	EM1	0.00251943	0.00181322	0.000706213	H2	57.7087	57.7087		AD1	300.3	300.3	EM1	0	1e-15	-1e-15	H2	153.85	153.85	AD1	300.3	300.3	EM1	0	0	0	H2	153.85
APP1	63.5291	63.5291	EM2	0.000188791	0.000265032	-7.6241e-05	*Biomass	61	61	APP1	63.5291	63.5291	EM2	0.000196698	0.000265032	-6.83332e-05	*Biomass	61	61	APP1	63.5291	63.5291	EM2	0.000162444	0.000161237	1.20664e-06	*Biomass	61	61		APP1	76.75	76.75	EM2	0	1e-15	-1e-15	*Biomass	0	0	APP1	76.75	76.75	EM2	0	0	0	*Biomass	0
APP2	54.5291	54.5291	EM3	1.57899	1.54073	0.0382639	CO2	224.883	224.883	APP2	54.5291	54.5291	EM3	1.30959	1.54073	-0.231137	CO2	224.883	224.883	APP2	54.5291	54.5291	EM3	1.30856	1.52958	-0.221021	CO2	224.883	224.883		APP2	66.75	66.75	EM3	6.04026	2.90666	3.1336	CO2	210	210	APP2	66.75	66.75	EM3	4.31228	6.79514	-2.48286	CO2	210
APP3	54.5291	54.5291	EM4	2.46715	2.45677	0.0103873	Acetate	27.5	27.5	APP3	54.5291	54.5291	EM4	2.69891	2.45677	0.242146	Acetate	27.5	27.5	APP3	54.5291	54.5291	EM4	2.10151	0.644706	1.4568	Acetate	27.5	27.5		APP3	66.75	66.75	EM4	17.9477	22.0425	-4.0948	Acetate	40	40	APP3	66.75	66.75	EM4	18.1757	17.1661	1.0096	Acetate	40
APP4	54.5291	54.5291	EM5	0.00105253	0.00110566	-5.3128e-05	Butyrate	40.0291	40.0291	APP4	54.5291	54.5291	EM5	0.000950259	0.00110566	-0.000155401	Butyrate	40.0291	40.0291	APP4	54.5291	54.5291	EM5	0.00113867	0.00141027	-0.000271594	Butyrate	40.0291	40.0291		APP4	66.75	66.75	EM5	0	1e-15	-1e-15	Butyrate	50.3	50.3	APP4	66.75	66.75	EM5	0	0	0	Butyrate	50.3
APP6	32.2374	32.1155	EM6	0.811431	0.816165	-0.00473437	Acetone	9	9	APP6	32.2374	32.1155	EM6	0.85866	0.816165	0.0424947	Acetone	9	9	APP6	32.2374	32.1155	EM6	0.744482	0.831301	-0.0868196	Acetone	9	9		APP6	45.1569	44.8843	EM6	1.72353	1.72926	-0.00573584	Acetone	10	10	APP6	45.1569	44.8843	EM6	0.934807	0.978703	-0.0438963	Acetone	10
APP7	32.2374	32.1155	EM7	0.0465881	0.054991	-0.00840288	Ethanol	7	7	APP7	32.2374	32.1155	EM7	0.0422291	0.054991	-0.0127619	Ethanol	7	7	APP7	32.2374	32.1155	EM7	0.0510904	0.0339891	0.0171013	Ethanol	7	7		APP7	45.1569	44.8843	EM7	0.151757	0.0879547	0.0638027	Ethanol	6.5	6.5	APP7	45.1569	44.8843	EM7	0.149483	0.171681	-0.0221975	Ethanol	6.5
APP8	44.2917	44.4137	EM8	0.0604705	0.070424	-0.00995348	Butanol	14.5	14.5	APP8	44.2917	44.4137	EM8	0.0565282	0.070424	-0.0138957	Butanol	14.5	14.5	APP8	44.2917	44.4137	EM8	0.0614941	0.0428806	0.0186135	Butanol	14.5	14.5		APP8	55.1431	55.4157	EM8	0.148011	0.117717	0.030294	Butanol	16.45	16.45	APP8	55.1431	55.4157	EM8	0.152623	0.297134	-0.14451	Butanol	16.45
APP9	44.2917	44.4137	EM9	0.296395	0.270899	0.0254961	H2O	192.072	192.072	APP9	44.2917	44.4137	EM9	0.30112	0.270899	0.0302211	H2O	192.072	192.072	APP9	44.2917	44.4137	EM9	0.29433	0.383587	-0.0892571	H2O	192.072	192.072		APP9	55.1431	55.4157	EM9	0.198701	0.260001	-0.0612997	H2O	200	200	APP9	55.1431	55.4157	EM9	0.204201	0.386308	-0.182106	H2O	200
BP1	0.027244	0.027244	EM10	0.854122	0.769327	0.0847953	Glucose	100	100	BP1	0.027244	0.027244	EM10	0.920871	0.769327	0.151544	Glucose	100	100	BP1	0.027244	0.027244	EM10	0.691664	0.709949	-0.0182842	Glucose	100	100		BP1	0	0	EM10	0.178639	0.950744	-0.772106	Glucose	100	100	BP1	0	0	EM10	0.301659	0.489966	-0.188307	Glucose	100
EM1	57.7087	57.7087	EM11	0.0433238	0.0507815	-0.00745776				EM1	57.7087	57.7087	EM11	0.0404472	0.0507815	-0.0103344				EM1	57.7087	57.7087	EM11	0.045828	0.0294382	0.0163898					EM1	153.85	153.85	EM11	0.110279	0.0800006	0.0302785				EM1	153.85	153.85	EM11	0.119419	0.0507268	0.0686919
EM10	61	61	EM12	0.743413	0.636216	0.107197	Biomass is an objective function for all calculation in this sheet with a .			EM10	61	61	EM12	0.838812	0.636216	0.202597				EM10	61	61	EM12	0.600783	0.553375	0.0474081					EM10	0	0	EM12	0.307968	0.543384	-0.235416				EM10	0	0	EM12	0.247539	0.301979	-0.0544397
EM3	224.883	224.883	EM13	0.0480558	0.0560931	-0.00803725	fixed flux value.			EM3	224.883	224.883	EM13	0.0434761	0.0560931	-0.012617				EM3	224.883	224.883	EM13	0.0498839	0.0327219	0.0171621					EM3	210	210	EM13	0.120946	0.0826841	0.0382617				EM3	210	210	EM13	0.124522	0.0734463	0.0510753
EM4	27.5	27.5	EM14	0.0465881	0.054991	-0.00840288				EM4	27.5	27.5	EM14	0.0422291	0.054991	-0.0127619				EM4	27.5	27.5	EM14	0.0510904	0.0339891	0.0171013					EM4	40	40	EM14	0.151757	0.0879547	0.0638027				EM4	40	40	EM14	0.149483	0.171681	-0.0221975
EM5	40.0291	40.0291	EM15	0.296395	0.270899	0.0254961	Max - maximizing the flux of a specific metabolite when biomass is an objective			EM5	40.0291	40.0291	EM15	0.30112	0.270899	0.0302211				EM5	40.0291	40.0291	EM15	0.29433	0.383587	-0.0892571					EM5	50.3	50.3	EM15	0.198701	0.260001	-0.0612997				EM5	50.3	50.3	EM15	0.204201	0.386308	-0.182106
EM6	9	9	EM16	0.0433238	0.0507815	-0.00745776	function with fixed flux value.			EM6	9	9	EM16	0.0404472	0.0507815	-0.0103344				EM6	9	9	EM16	0.045828	0.0294382	0.0163898					EM6	10	10	EM16	0.110279	0.0800006	0.0302785				EM6	10	10	EM16	0.119419	0.0507268	0.0686919
EM7	7	7	EM17	0.0480558	0.0560931	-0.00803725				EM7	7	7	EM17	0.0434761	0.0560931	-0.012617				EM7	7	7	EM17	0.0498839	0.0327219	0.0171621					EM7	6.5	6.5	EM17	0.120946	0.0826841	0.0382617				EM7	6.5	6.5	EM17	0.124522	0.0734463	0.0510753
EM8	14.5	14.5	EM18	0.148218	0.13769	0.0105277	Min - minimizing the flux of a specific metabolite when biomass is an objective			EM8	14.5	14.5	EM18	0.145118	0.13769	0.0074283				EM8	14.5	14.5	EM18	0.168402	0.206112	-0.0377096					EM8	16.45	16.45	EM18	0.369022	0.473574	-0.104552				EM8	16.45	16.45	EM18	0.323356	0.298263	0.0250926
EM9	192.072	192.072	EM19	0.288364	0.279683	0.00868101	function with fixed flux value.			EM9	192.072	192.072	EM19	0.29483	0.279683	0.0151469				EM9	192.072	192.072	EM19	0.287671	0.33006	-0.042389					EM9	200	200	EM19	0.590955	0.886817	-0.295862				EM9	200	200	EM19	0.394023	0.32496	0.0690625
EMP1	100	100	EM20	0.0100486	0.0119596	-0.00191098				EMP1	100	100	EM20	0.00913858	0.0119596	-0.00282098				EMP1	100	100	EM20	0.0105341	0.00724096	0.0032931					EMP1	100	100	EM20	0.0309208	0.0195067	0.0114141				EMP1	100	100	EM20	0.0295717	0.029114	0.000457705
EMP2	100	100	EM21	0.129935	0.118152	0.0117826	Observation:			EMP2	100	100	EM21	0.132395	0.118152	0.0142435				EMP2	100	100	EM21	0.145672	0.166359	-0.0206866					EMP2	100	100	EM21	0.307164	0.34767	-0.040506				EMP2	100	100	EM21	0.198561	0.157162	0.0413992
EMP3	97.7115	97.7115	EM22	0.144875	0.131458	0.0134161	Flux distribution of original network is unique and there is variation in			EMP3	97.7115	97.7115	EM22	0.139443	0.131458	0.0079844				EMP3	97.7115	97.7115	EM22	0.151038	0.216375	-0.0653368					EMP3	100	100	EM22	0.0826846	0.144778	-0.0620938				EMP3	100	100	EM22	0.132984	0.190954	-0.0579692
EMP4	97.7115	97.7115	EM23	0.00900174	0.0105129	-0.00151112	sets of flux values in EMs (comparison is based on maximizing and			EMP4	97.7115	97.7115	EM23	0.0083685	0.0105129	-0.00214436				EMP4	97.7115	97.7115	EM23	0.00923834	0.00606578	0.00317256					EMP4	100	100	EM23	0.0225024	0.0160122	0.00649022				EMP4	100	100	EM23	0.0235393	0.0107364	0.012803
EMP5	194.279	194.279	EM24	0.101016	0.0807041	0.0203124	minimizing a specific metabolite when flux value of biomass was fixed)			EMP5	194.279	194.279	EM24	0.112454	0.0807041	0.0317497				EMP5	194.279	194.279	EM24	0.0990622	0.0966936	0.00236858					EMP5	200	200	EM24	0.0580435	0.0858263	-0.0277828				EMP5	200	200	EM24	0.0549511	0.0607115	-0.00576042
EMP6	192.072	192.072	EM25	0.148218	0.13769	0.0105277				EMP6	192.072	192.072	EM25	0.145118	0.13769	0.0074283				EMP6	192.072	192.072	EM25	0.168402	0.206112	-0.0377096					EMP6	200	200	EM25	0.369022	0.473574	-0.104552				EMP6	200	200	EM25	0.323356	0.298263	0.0250926
EMP7	86.2961	86.2961	EM26	0.0100486	0.0119596	-0.00191098	Note: This methodology is adapted from Mahadevan and Schilling_2003 to			EMP7	86.2961	86.2961	EM26	0.00913858	0.0119596	-0.00282098				EMP7	86.2961	86.2961	EM26	0.0105341	0.00724096	0.0032931					EMP7	100	100	EM26	0.0309208	0.0195067	0.0114141				EMP7	100	100	EM26	0.0295717	0.029114	0.000457705
HPP1	170.821	170.821	EM27	0.144875	0.131458	0.0134161	calculate the flux variability wherein the same optimal objective.			HPP1	170.821	170.821	EM27	0.139443	0.131458	0.0079844				HPP1	170.821	170.821	EM27	0.151038	0.216375	-0.0653368					HPP1	200	200	EM27	0.0826846	0.144778	-0.0620938				HPP1	200	200	EM27	0.132984	0.190954	-0.0579692
HPP2	81.7329	81.7329	EM28	0.00900174	0.0105129	-0.00151112				HPP2	81.7329	81.7329	EM28	0.0083685	0.0105129	-0.00214436				HPP2	81.7329	81.7329	EM28	0.00923834	0.00606578	0.00317256					HPP2	0	0	EM28	0.0225024	0.0160122	0.00649022				HPP2	0	0	EM28	0.0235393	0.0107364	0.012803
HPP3	31.3797	31.3797	EM29	1.80909e-05	2.30574e-05	-4.96654e-06				HPP3	31.3797	31.3797	EM29	1.55799e-05	2.30574e-05	-7.4775e-06				HPP3	31.3797	31.3797	EM29	2.25547e-05	1.63863e-05	6.16841e-06					HPP3	46.15	46.15	EM29	0	0	0				HPP3	46.15	46.15	EM29	0	0	0
HPP4	57.7087	57.7087	EM30	6.37637e-06	7.82037e-06	-1.444e-06				HPP4	57.7087	57.7087	EM30	5.68678e-06	7.82037e-06	-2.13359e-06				HPP4	57.7087	57.7087	EM30	7.51478e-06	5.41743e-06	2.09734e-06					HPP4	153.85	153.85	EM30	0	0	0				HPP4	153.85	153.85	EM30	0	0	0
PPP2	2.28852	2.28852	EM31	0.81726	0.787899	0.0293617				PPP2	2.28852	2.28852	EM31	0.741837	0.787899	-0.0460614				PPP2	2.28852	2.28852	EM31	0.749648	1.39243	-0.642786					PPP2	0	0	EM31	1.12259	0.946271	0.176319				PPP2	0	0	EM31	2.72927	1.90721	0.822064
PPP3	-2.28852	-2.28852	EM32	9.24668e-05	6.97219e-05	2.27449e-05				PPP3	-2.28852	-2.28852	EM32	0.000101031	6.97219e-05	3.1309e-05				PPP3	-2.28852	-2.28852	EM32	9.88724e-05	4.25739e-05	5.62985e-05					PPP3	0	0	EM32	0	0	0				PPP3	0	0	EM32	0	0	0
PPP4	-1.14426	-1.14426	EM33	1.35183e-05	1.50799e-05	-1.56162e-06				PPP4	-1.14426	-1.14426	EM33	1.24292e-05	1.50799e-05	-2.65068e-06				PPP4	-1.14426	-1.14426	EM33	1.49777e-05	9.40793e-06	5.56976e-06					PPP4	0	0	EM33	0	0	0				PPP4	0	0	EM33	0	0	0
PPP5	-1.14426	-1.14426	EM34	6.37637e-06	7.82037e-06	-1.444e-06				PPP5	-1.14426	-1.14426	EM34	5.68678e-06	7.82037e-06	-2.13359e-06				PPP5	-1.14426	-1.14426	EM34	7.51478e-06	5.41743e-06	2.09734e-06					PPP5	0	0	EM34	0	0	0				PPP5	0	0	EM34	0	0	0
PPP6	-1.14426	-1.14426	EM35	1.35183e-05	1.50799e-05	-1.56162e-06				PPP6	-1.14426	-1.14426	EM35	1.24292e-05	1.50799e-05	-2.65068e-06				PPP6	-1.14426	-1.14426	EM35	1.49777e-05	9.40793e-06	5.56976e-06					PPP6	0	0	EM35	0	0	0				PPP6	0	0	EM35	0	0	0
SPP1	7	7	EM36	0.227663	0.210456	0.0172062				SPP1	7	7	EM36	0.214421	0.210456	0.00396452				SPP1	7	7	EM36	0.232048	0.275576	-0.0435278					SPP1	6.5	6.5	EM36	0.518837	0.889763	-0.370925				SPP1	6.5	6.5	EM36	1.03228	0.681006	0.351274
SPP2	7	7	EM37	0.000121309	0.000208541	-8.72317e-05				SPP2	7	7	EM37	9.4616e-05	0.000208541	-0.000113925				SPP2	7	7	EM37	0.000117765	0.000117341	4.23786e-07					SPP2	6.5	6.5	EM37	0	2e-15	-2e-15				SPP2	6.5	6.5	EM37	0	0	0
SPP3	4.73744	4.61546	EM38	4.1779e-06	5.15502e-06	-9.77127e-07				SPP3	4.73744	4.61546	EM38	3.47619e-06	5.15502e-06	-1.67883e-06				SPP3	4.73744	4.61546	EM38	4.50295e-06	3.28978e-06	1.21317e-06					SPP3	5.15689	4.88433	EM38	0	0	0				SPP3	5.15689	4.88433	EM38	0	0	0
SPP4	4.26256	4.38454	EM39	0.078393	0.27273	-0.194337				SPP4	4.26256	4.38454	EM39	0.0201337	0.27273	-0.252597				SPP4	4.26256	4.38454	EM39	0.352984	0.581988	-0.229004					SPP4	4.84311	5.11567	EM39	2.62919	0.421968	2.20722				SPP4	4.84311	5.11567	EM39	2.12017	2.59075	-0.470586
SPP5	9	9	EM40	0.000435193	0.000385738	4.94554e-05				SPP5	9	9	EM40	0.000461936	0.000385738	7.61986e-05				SPP5	9	9	EM40	0.000391301	0.000321275	7.00259e-05					SPP5	10	10	EM40	0	0	0				SPP5	10	10	EM40	0	0	0
SPP6	14.5	14.5	EM41	2.25632e-06	2.01347e-06	2.42843e-07				SPP6	14.5	14.5	EM41	3.87203e-06	2.01347e-06	1.85855e-06				SPP6	14.5	14.5	EM41	1.85373e-06	1.32856e-06	5.25165e-07					SPP6	16.45	16.45	EM41	0	0	0				SPP6	16.45	16.45	EM41	0	0	0
SPP7	14.5	14.5	EM42	0.620552	0.600386	0.0201659				SPP7	14.5	14.5	EM42	0.594273	0.600386	-0.00611259				SPP7	14.5	14.5	EM42	0.563841	0.65593	-0.092089					SPP7	16.45	16.45	EM42	1.66182	1.88488	-0.223054				SPP7	16.45	16.45	EM42	1.68886	2.16261	-0.473749
			EM43	3.37743e-05	4.823e-05	-1.44557e-05							EM43	3.28733e-05	4.823e-05	-1.53567e-05							EM43	3.24584e-05	3.73268e-05	-4.86837e-06								EM43	0	0	0							EM43	0	0	0
			EM44	3.37743e-05	4.823e-05	-1.44557e-05							EM44	3.28733e-05	4.823e-05	-1.53567e-05							EM44	3.24584e-05	3.73268e-05	-4.86837e-06								EM44	0	0	0							EM44	0	0	0
			EM45	4.1779e-06	5.15502e-06	-9.77127e-07							EM45	3.47619e-06	5.15502e-06	-1.67883e-06							EM45	4.50295e-06	3.28978e-06	1.21317e-06								EM45	0	0	0							EM45	0	0	0
			EM46	0.215702	0.19654	0.019162							EM46	0.190936	0.19654	-0.00560398							EM46	0.23309	0.376415	-0.143324								EM46	0.327111	0.142584	0.184527							EM46	0.409768	0.234061	0.175707
			EM47	0.215702	0.19654	0.019162							EM47	0.190936	0.19654	-0.00560398							EM47	0.23309	0.376415	-0.143324								EM47	0.327111	0.142584	0.184527							EM47	0.409768	0.234061	0.175707
			EM48	1.04332e-05	8.49694e-06	1.93622e-06							EM48	1.36709e-05	8.49694e-06	5.17394e-06							EM48	7.64953e-06	1.05621e-05	-2.91254e-06								EM48	0	0	0							EM48	0	0	0
			EM49	1.04332e-05	8.49694e-06	1.93622e-06							EM49	1.36709e-05	8.49694e-06	5.17394e-06							EM49	7.64953e-06	1.05621e-05	-2.91254e-06								EM49	0	0	0							EM49	0	0	0
			EM50	2.25632e-06	2.01347e-06	2.42843e-07							EM50	3.87203e-06	2.01347e-06	1.85855e-06							EM50	1.85373e-06	1.32856e-06	5.25165e-07								EM50	0	0	0							EM50	0	0	0
			EM51	1.96704e-05	2.39058e-05	-4.23545e-06							EM51	1.75976e-05	2.39058e-05	-6.30828e-06							EM51	2.33197e-05	1.57223e-05	7.5974e-06								EM51	0	1e-15	-1e-15							EM51	0	0	0
			EM52	3.4578e-05	4.127e-05	-6.69205e-06							EM52	3.44294e-05	4.127e-05	-6.84058e-06							EM52	3.87015e-05	2.39311e-05	1.47703e-05								EM52	0	5e-15	-5e-15							EM52	0	1e-15	-1e-15
			EM53	9.85058e-06	1.18127e-05	-1.96212e-06							EM53	8.23135e-06	1.18127e-05	-3.58135e-06							EM53	1.04773e-05	7.34851e-06	3.12883e-06								EM53	0	0	0							EM53	0	0	0
			EM54	3.71212e-05	4.55132e-05	-8.39203e-06							EM54	3.47743e-05	4.55132e-05	-1.07388e-05							EM54	4.05998e-05	2.52299e-05	1.53699e-05								EM54	0	4e-15	-4e-15							EM54	0	0	0
			EM55	0.318636	0.293724	0.0249123							EM55	0.30368	0.293724	0.00995582							EM55	0.327926	0.38999	-0.0620634								EM55	1.44594	0.624664	0.821272							EM55	1.67337	1.5914	0.0819662
			EM56	0.0153854	0.0181926	-0.00280723							EM56	0.0143653	0.0181926	-0.00382732							EM56	0.0159281	0.0107988	0.00512927								EM56	0.052678	0.0294362	0.0232419							EM56	0.0448459	0.0865505	-0.0417046
			EM57	0.0153854	0.0181926	-0.00280723							EM57	0.0143653	0.0181926	-0.00382732							EM57	0.0159281	0.0107988	0.00512927								EM57	0.052678	0.0294362	0.0232419							EM57	0.0448459	0.0865505	-0.0417046
			EM58	5.88891e-05	8.17744e-05	-2.28853e-05							EM58	5.94397e-05	8.17744e-05	-2.23346e-05							EM58	5.42661e-05	5.81797e-05	-3.91357e-06								EM58	0	0	0							EM58	0	0	0
			EM59	0.0143985	0.016838	-0.00243953							EM59	0.0135659	0.016838	-0.00327214							EM59	0.0146995	0.00962916	0.00507034								EM59	0.0363958	0.0259767	0.0104191							EM59	0.0377506	0.012286	0.0254646
			EM60	0.169267	0.149647	0.01962							EM60	0.164857	0.149647	0.01521							EM60	0.186999	0.25337	-0.0663706								EM60	0.175367	0.126673	0.0486941							EM60	0.177523	0.261329	-0.0838064
			EM61	0.0143985	0.016838	-0.00243953							EM61	0.0135659	0.016838	-0.00327214							EM61	0.0146995	0.00962916	0.00507034								EM61	0.0363958	0.0259767	0.0104191							EM61	0.0377506	0.012286	0.0254646
			EM62	4.59204e-05	5.81287e-05	-1.22083e-05							EM62	3.87453e-05	5.81287e-05	-1.93834e-05							EM62	6.84874e-05	6.96795e-05	-1.19206e-06								EM62	0	1e-15	-1e-15							EM62	0	0	0
			EM63	2.15302e-05	2.64056e-05	-4.87541e-06							EM63	1.88025e-05	2.64056e-05	-7.60313e-06							EM63	2.50532e-05	1.77298e-05	7.32339e-06								EM63	0	1e-15	-1e-15							EM63	0	0	0
			EM64	4.66032e-05	5.6314e-05	-9.71083e-06							EM64	3.85904e-05	5.6314e-05	-1.77236e-05							EM64	4.86167e-05	3.38636e-05	1.47531e-05								EM64	0	3e-15	-3e-15							EM64	0	0	0
			EM65	2.78677e-05	3.34699e-05	-5.6022e-06							EM65	2.39953e-05	3.34699e-05	-9.47463e-06							EM65	2.97729e-05	2.21084e-05	7.66445e-06								EM65	0	1e-15	-1e-15							EM65	0	0	0
			EM66	2.40579e-05	2.85971e-05	-4.53924e-06							EM66	1.95107e-05	2.85971e-05	-9.08644e-06							EM66	2.49464e-05	1.78369e-05	7.1095e-06								EM66	0	2e-15	-2e-15							EM66	0	0	0
			EM67	1.99904e-05	2.35776e-05	-3.58721e-06							EM67	1.59881e-05	2.35776e-05	-7.58953e-06							EM67	2.2093e-05	1.53015e-05	6.79154e-06								EM67	0	2e-15	-2e-15							EM67	0	0	0
[truncated: 41 more columns]

## Sheet: Constant pH 4.5
Flux variability analysis
Constant ph 4.5 (Acidogenesis)																															Constant pH 4.5 (Solventogenesis)
*Biomass (Objective Function)										Acetic acid										Butyric acid (Objective Function)											*Biomass (Objective function)										Acetic acid
Original Network			Elementary Modes				External Metabolites			Original Network			Elementary Modes				External Metabolites			Original Network			Elementary Modes				External Metabolites				Original Network			Elementary Modes				External Metabolites			Original Network			Elementary Modes				External Metabolites
	Max	Min		Max	Min	Max-Min		Max	Min		Max	Min		Max	Min	Max-Min		Max	Min		Max	Min		Max	Min	Max-Min						Max	Min		Max	Min	Max-Min		Max	Min		Max	Min		Max	Min	Max-Min		Max
Reaction	Flux (mM/Lh)	Flux (mM/Lh)	EM_MAIN	Flux (mM/Lh)	Flux (mM/Lh)		EXTERNAL METABOLITE	Accumulation rate (mM/h)	Accumulation rate (mM/h)	Reaction	Flux (mM/Lh)	Flux (mM/Lh)	EM_MAIN	Flux (mM/Lh)	Flux (mM/Lh)		EXTERNAL METABOLITE	Accumulation rate (mM/h)	Accumulation rate (mM/h)	Reaction	Flux (mM/Lh)	Flux (mM/Lh)	EM_MAIN	Flux (mM/Lh)	Flux (mM/Lh)		EXTERNAL METABOLITE	Accumulation rate (mM/h)	Accumulation rate (mM/h)		Reaction	Flux (mM/Lh)	Flux (mM/Lh)	EM_MAIN	Flux (mM/Lh)	Flux (mM/Lh)		EXTERNAL METABOLITE	Accumulation rate (mM/h)	Accumulation rate (mM/h)	Reaction	Flux (mM/Lh)	Flux (mM/Lh)	EM_MAIN	Flux (mM/Lh)	Flux (mM/Lh)		EXTERNAL METABOLITE	Accumulation rate (mM/h)
AD1	71.2841	71.2841	EM1	0.00219531	0.00171872	0.000476598	H2	61.1381	61.1381	AD1	71.2841	71.2841	EM1	0.00252481	0.00209491	0.000429903	H2	61.1381	61.1381	AD1	71.2841	71.2841	EM1	0.00214499	0.00156282	0.000582174	H2	61.1381	61.1381		AD1	298.7	298.7	EM1	0	0	0	H2	154.35	154.35	AD1	298.7	298.7	EM1	7e-15	0	7e-15	H2	154.35
APP1	62.8942	62.8942	EM2	0.000172657	0.000230819	-5.81624e-05	*Biomass	60	60	APP1	62.8942	62.8942	EM2	0.000178791	0.000295864	-0.000117073	*Biomass	60	60	APP1	62.8942	62.8942	EM2	0.000146297	0.000153571	-7.27355e-06	*Biomass	60	60		APP1	76.05	76.05	EM2	0	0	0	*Biomass	0	0	APP1	76.05	76.05	EM2	3e-15	0	3e-15	*Biomass	0
APP2	54.1942	54.1942	EM3	1.63054	1.64933	-0.0187864	CO2	224.323	224.323	APP2	54.1942	54.1942	EM3	1.3063	1.24582	0.0604846	CO2	224.323	224.323	APP2	54.1942	54.1942	EM3	1.48775	1.74263	-0.254874	CO2	224.323	224.323		APP2	65.05	65.05	EM3	5.55648	2.88129	2.67519	CO2	211	211	APP2	65.05	65.05	EM3	2.97251	5.47822	-2.50571	CO2	211
APP3	54.1942	54.1942	EM4	3.06991	3.07334	-0.00343179	Acetate	28.9	28.9	APP3	54.1942	54.1942	EM4	3.38211	4.13391	-0.751794	Acetate	28.9	28.9	APP3	54.1942	54.1942	EM4	2.8577	0.937908	1.91979	Acetate	28.9	28.9		APP3	65.05	65.05	EM4	17.2215	20.8654	-3.64389	Acetate	39.9	39.9	APP3	65.05	65.05	EM4	20.1681	16.924	3.24414	Acetate	39.9
APP4	54.1942	54.1942	EM5	0.00109944	0.00115098	-5.15453e-05	Butyrate	40.2942	40.2942	APP4	54.1942	54.1942	EM5	0.000984343	0.000822967	0.000161376	Butyrate	40.2942	40.2942	APP4	54.1942	54.1942	EM5	0.00117546	0.00145979	-0.000284335	Butyrate	40.2942	40.2942		APP4	65.05	65.05	EM5	0	0	0	Butyrate	47.8	47.8	APP4	65.05	65.05	EM5	1e-15	0	1e-15	Butyrate	47.8
APP6	33.4779	33.3842	EM6	0.813203	0.870588	-0.0573847	Acetone	8.7	8.7	APP6	33.4779	33.3842	EM6	0.868595	0.423643	0.444951	Acetone	8.7	8.7	APP6	33.4779	33.3842	EM6	0.754028	0.770523	-0.0164951	Acetone	8.7	8.7		APP6	45.6243	45.3791	EM6	2.2568	2.12015	0.136648	Acetone	11	11	APP6	45.6243	45.3791	EM6	1.96368	1.28994	0.67374	Acetone	11
APP7	33.4779	33.3842	EM7	0.0482285	0.0522187	-0.00399023	Ethanol	7.5	7.5	APP7	33.4779	33.3842	EM7	0.0457142	0.0344441	0.0112701	Ethanol	7.5	7.5	APP7	33.4779	33.3842	EM7	0.049737	0.0431273	0.00660972	Ethanol	7.5	7.5		APP7	45.6243	45.3791	EM7	0.175427	0.0987339	0.0766936	Ethanol	8	8	APP7	45.6243	45.3791	EM7	0.133601	0.189127	-0.0555255	Ethanol	8
APP8	44.4163	44.51	EM8	0.0601466	0.0641114	-0.00396482	Butanol	13.9	13.9	APP8	44.4163	44.51	EM8	0.0582466	0.0514922	0.00675438	Butanol	13.9	13.9	APP8	44.4163	44.51	EM8	0.0573931	0.0555929	0.00180024	Butanol	13.9	13.9		APP8	53.0757	53.3209	EM8	0.158162	0.118931	0.0392305	Butanol	17.25	17.25	APP8	53.0757	53.3209	EM8	0.118729	0.305684	-0.186955	Butanol	17.25
APP9	44.4163	44.51	EM9	0.2875	0.28428	0.00321978	H2O	192.202	192.202	APP9	44.4163	44.51	EM9	0.281205	0.19664	0.0845646	H2O	192.202	192.202	APP9	44.4163	44.51	EM9	0.300546	0.327447	-0.0269009	H2O	192.202	192.202		APP9	53.0757	53.3209	EM9	0.251455	0.319699	-0.0682447	H2O	200	200	APP9	53.0757	53.3209	EM9	0.233956	0.451847	-0.21789	H2O	200
BP1	0.026798	0.026798	EM10	0.787302	0.770026	0.0172764	Glucose	100	100	BP1	0.026798	0.026798	EM10	0.824135	0.415782	0.408353	Glucose	100	100	BP1	0.026798	0.026798	EM10	0.664026	0.544531	0.119495	Glucose	100	100		BP1	0	0	EM10	0.195	1.04172	-0.846723	Glucose	100	100	BP1	0	0	EM10	0.725884	0.528769	0.197115	Glucose	100
EM1	61.1381	61.1381	EM11	0.0440088	0.0475963	-0.00358747				EM1	61.1381	61.1381	EM11	0.042807	0.0275544	0.0152526				EM1	61.1381	61.1381	EM11	0.0446329	0.0371987	0.00743413					EM1	154.35	154.35	EM11	0.126243	0.092296	0.0339471				EM1	154.35	154.35	EM11	0.112732	0.0575549	0.055177
EM10	60	60	EM12	0.707258	0.653595	0.0536634	Biomass is an objective function for all calculation in this sheet with a .			EM10	60	60	EM12	0.767471	0.321269	0.446202				EM10	60	60	EM12	0.591008	0.429962	0.161046					EM10	0	0	EM12	0.403833	0.695376	-0.291543				EM10	0	0	EM12	0.436782	0.359724	0.0770589
EM3	224.323	224.323	EM13	0.0476631	0.0515581	-0.00389508	fixed flux value.			EM3	224.323	224.323	EM13	0.0448451	0.0307761	0.014069				EM3	224.323	224.323	EM13	0.0477678	0.04059	0.00717782					EM3	211	211	EM13	0.136212	0.091506	0.0447059				EM3	211	211	EM13	0.121774	0.0804698	0.0413043
EM4	28.9	28.9	EM14	0.0482285	0.0522187	-0.00399023				EM4	28.9	28.9	EM14	0.0457142	0.0344441	0.0112701				EM4	28.9	28.9	EM14	0.049737	0.0431273	0.00660972					EM4	39.9	39.9	EM14	0.175427	0.0987339	0.0766936				EM4	39.9	39.9	EM14	0.133601	0.189127	-0.0555255
EM5	40.2942	40.2942	EM15	0.2875	0.28428	0.00321978	Max - maximizing the flux of a specific metabolite when biomass is an objective			EM5	40.2942	40.2942	EM15	0.281205	0.19664	0.0845646				EM5	40.2942	40.2942	EM15	0.300546	0.327447	-0.0269009					EM5	47.8	47.8	EM15	0.251455	0.319699	-0.0682447				EM5	47.8	47.8	EM15	0.233956	0.451847	-0.21789
EM6	8.7	8.7	EM16	0.0440088	0.0475963	-0.00358747	function with fixed flux value.			EM6	8.7	8.7	EM16	0.042807	0.0275544	0.0152526				EM6	8.7	8.7	EM16	0.0446329	0.0371987	0.00743413					EM6	11	11	EM16	0.126243	0.092296	0.0339471				EM6	11	11	EM16	0.112732	0.0575549	0.055177
EM7	7.5	7.5	EM17	0.0476631	0.0515581	-0.00389508				EM7	7.5	7.5	EM17	0.0448451	0.0307761	0.014069				EM7	7.5	7.5	EM17	0.0477678	0.04059	0.00717782					EM7	8	8	EM17	0.136212	0.091506	0.0447059				EM7	8	8	EM17	0.121774	0.0804698	0.0413043
EM8	13.9	13.9	EM18	0.140328	0.135195	0.00513274	Min - minimizing the flux of a specific metabolite when biomass is an objective			EM8	13.9	13.9	EM18	0.137722	0.104489	0.0332326				EM8	13.9	13.9	EM18	0.162653	0.184714	-0.0220614					EM8	17.25	17.25	EM18	0.363765	0.463792	-0.100027				EM8	17.25	17.25	EM18	0.457891	0.328258	0.129632
EM9	192.202	192.202	EM19	0.267217	0.273589	-0.00637196	function with fixed flux value.			EM9	192.202	192.202	EM19	0.275309	0.185489	0.0898207				EM9	192.202	192.202	EM19	0.27081	0.284025	-0.0132149					EM9	200	200	EM19	0.594202	0.880648	-0.286446				EM9	200	200	EM19	0.797211	0.37316	0.424051
EMP1	100	100	EM20	0.00985876	0.0108266	-0.000967799				EMP1	100	100	EM20	0.00938241	0.0176426	-0.00826017				EMP1	100	100	EM20	0.00991443	0.00877926	0.00113517					EMP1	100	100	EM20	0.0334399	0.0213447	0.0120953				EMP1	100	100	EM20	0.0253806	0.031758	-0.00637734
EMP2	100	100	EM21	0.12052	0.114461	0.00605902	Observation:			EMP2	100	100	EM21	0.123731	0.0846211	0.0391104				EMP2	100	100	EM21	0.136492	0.142438	-0.00594676					EMP2	100	100	EM21	0.310969	0.352776	-0.0418067				EMP2	100	100	EM21	0.341367	0.180621	0.160746
EMP3	97.749	97.749	EM22	0.13529	0.134261	0.00102847	Flux distribution of original network is unique and there is variation in			EMP3	97.749	97.749	EM22	0.125858	0.127937	-0.00207922				EMP3	97.749	97.749	EM22	0.151141	0.183735	-0.0325943					EMP3	100	100	EM22	0.100179	0.158583	-0.0584034				EMP3	100	100	EM22	0.146553	0.207549	-0.0609951
EMP4	97.749	97.749	EM23	0.00896525	0.00967062	-0.000705368	sets of flux values in EMs (comparison is based on maximizing and			EMP4	97.749	97.749	EM23	0.00862605	0.00611036	0.00251569				EMP4	97.749	97.749	EM23	0.00887566	0.0075242	0.00135146					EMP4	100	100	EM23	0.0250015	0.0181479	0.00685353				EMP4	100	100	EM23	0.0218188	0.0124223	0.00939654
EMP5	194.372	194.372	EM24	0.0936246	0.0792876	0.014337	minimizing a specific metabolite when flux value of biomass was fixed)			EMP5	194.372	194.372	EM24	0.101236	0.0519121	0.0493238				EMP5	194.372	194.372	EM24	0.0942703	0.0751153	0.019155					EMP5	200	200	EM24	0.071139	0.102491	-0.0313517				EMP5	200	200	EM24	0.0843453	0.0674044	0.0169409
EMP6	192.202	192.202	EM25	0.140328	0.135195	0.00513274				EMP6	192.202	192.202	EM25	0.137722	0.104489	0.0332326				EMP6	192.202	192.202	EM25	0.162653	0.184714	-0.0220614					EMP6	200	200	EM25	0.363765	0.463792	-0.100027				EMP6	200	200	EM25	0.457891	0.328258	0.129632
EMP7	86.5208	86.5208	EM26	0.00985876	0.0108266	-0.000967799	Note: This methodology is adapted from Mahadevan and Schilling_2003 to			EMP7	86.5208	86.5208	EM26	0.00938241	0.0176426	-0.00826017				EMP7	86.5208	86.5208	EM26	0.00991443	0.00877926	0.00113517					EMP7	100	100	EM26	0.0334399	0.0213447	0.0120953				EMP7	100	100	EM26	0.0253806	0.031758	-0.00637734
HPP1	171.3	171.3	EM27	0.13529	0.134261	0.00102847	calculate the flux variability wherein the same optimal objective.			HPP1	171.3	171.3	EM27	0.125858	0.127937	-0.00207922				HPP1	171.3	171.3	EM27	0.151141	0.183735	-0.0325943					HPP1	200	200	EM27	0.100179	0.158583	-0.0584034				HPP1	200	200	EM27	0.146553	0.207549	-0.0609951
HPP2	80.393	80.393	EM28	0.00896525	0.00967062	-0.000705368				HPP2	80.393	80.393	EM28	0.00862605	0.00611036	0.00251569				HPP2	80.393	80.393	EM28	0.00887566	0.0075242	0.00135146					HPP2	0	0	EM28	0.0250015	0.0181479	0.00685353				HPP2	0	0	EM28	0.0218188	0.0124223	0.00939654
HPP3	29.7686	29.7686	EM29	2.17453e-05	2.45521e-05	-2.80679e-06				HPP3	29.7686	29.7686	EM29	1.98129e-05	5.20578e-05	-3.22449e-05				HPP3	29.7686	29.7686	EM29	2.43595e-05	2.31409e-05	1.21863e-06					HPP3	45.65	45.65	EM29	0	0	0				HPP3	45.65	45.65	EM29	3e-15	0	3e-15
HPP4	61.1381	61.1381	EM30	7.31296e-06	7.93753e-06	-6.24569e-07				HPP4	61.1381	61.1381	EM30	6.83586e-06	1.69803e-05	-1.01444e-05				HPP4	61.1381	61.1381	EM30	7.83085e-06	7.36732e-06	4.6353e-07					HPP4	154.35	154.35	EM30	0	0	0				HPP4	154.35	154.35	EM30	1e-15	0	1e-15
PPP2	2.25101	2.25101	EM31	0.882606	0.910634	-0.0280271				PPP2	2.25101	2.25101	EM31	0.733228	0.745711	-0.0124824				PPP2	2.25101	2.25101	EM31	0.912879	1.72552	-0.812638					PPP2	0	0	EM31	1.12256	1.206	-0.0834432				PPP2	0	0	EM31	1.94016	2.38139	-0.44123
PPP3	-2.25101	-2.25101	EM32	0.000131027	9.66377e-05	3.43898e-05				PPP3	-2.25101	-2.25101	EM32	0.000147282	0.000170638	-2.3356e-05				PPP3	-2.25101	-2.25101	EM32	0.000134016	5.70839e-05	7.69318e-05					PPP3	0	0	EM32	0	0	0				PPP3	0	0	EM32	4e-15	0	4e-15
PPP4	-1.1255	-1.1255	EM33	1.49811e-05	1.51471e-05	-1.65958e-07				PPP4	-1.1255	-1.1255	EM33	1.45039e-05	1.03767e-05	4.12713e-06				PPP4	-1.1255	-1.1255	EM33	1.5121e-05	1.26928e-05	2.42811e-06					PPP4	0	0	EM33	0	0	0				PPP4	0	0	EM33	2e-15	0	2e-15
PPP5	-1.1255	-1.1255	EM34	7.31296e-06	7.93753e-06	-6.24569e-07				PPP5	-1.1255	-1.1255	EM34	6.83586e-06	1.69803e-05	-1.01444e-05				PPP5	-1.1255	-1.1255	EM34	7.83085e-06	7.36732e-06	4.6353e-07					PPP5	0	0	EM34	0	0	0				PPP5	0	0	EM34	1e-15	0	1e-15
PPP6	-1.1255	-1.1255	EM35	1.49811e-05	1.51471e-05	-1.65958e-07				PPP6	-1.1255	-1.1255	EM35	1.45039e-05	1.03767e-05	4.12713e-06				PPP6	-1.1255	-1.1255	EM35	1.5121e-05	1.26928e-05	2.42811e-06					PPP6	0	0	EM35	0	0	0				PPP6	0	0	EM35	2e-15	0	2e-15
SPP1	7.5	7.5	EM36	0.227285	0.213326	0.0139588				SPP1	7.5	7.5	EM36	0.207306	0.147936	0.0593703				SPP1	7.5	7.5	EM36	0.242378	0.267059	-0.0246805					SPP1	8	8	EM36	0.496451	0.818686	-0.322234				SPP1	8	8	EM36	0.818414	0.702137	0.116277
SPP2	7.5	7.5	EM37	0.00011166	0.000167787	-5.61267e-05				SPP2	7.5	7.5	EM37	8.61673e-05	0.000336532	-0.000250365				SPP2	7.5	7.5	EM37	9.93923e-05	0.000109883	-1.04905e-05					SPP2	8	8	EM37	0	0	0				SPP2	8	8	EM37	3e-15	0	3e-15
SPP3	4.57793	4.48424	EM38	4.0659e-06	4.53278e-06	-4.66879e-07				SPP3	4.57793	4.48424	EM38	3.55095e-06	5.31942e-06	-1.76847e-06				SPP3	4.57793	4.48424	EM38	4.17396e-06	3.83668e-06	3.37285e-07					SPP3	5.72428	5.47911	EM38	0	0	0				SPP3	5.72428	5.47911	EM38	0	0	0
SPP4	4.12207	4.21576	EM39	0.0651452	0.121365	-0.0562199				SPP4	4.12207	4.21576	EM39	0.0249443	0.015366	0.00957833				SPP4	4.12207	4.21576	EM39	0.113174	0.831961	-0.718786					SPP4	5.27572	5.52089	EM39	3.03046	0.949988	2.08047				SPP4	5.27572	5.52089	EM39	1.27738	2.65262	-1.37524
SPP5	8.7	8.7	EM40	0.000420511	0.000394102	2.64091e-05				SPP5	8.7	8.7	EM40	0.000445915	0.000392588	5.33264e-05				SPP5	8.7	8.7	EM40	0.000405187	0.000285388	0.0001198					SPP5	11	11	EM40	0	0	0				SPP5	11	11	EM40	1e-15	0	1e-15
SPP6	13.9	13.9	EM41	2.36489e-06	1.83483e-06	5.30057e-07				SPP6	13.9	13.9	EM41	3.9869e-06	9.73827e-06	-5.75137e-06				SPP6	13.9	13.9	EM41	1.57867e-06	1.79698e-06	-2.18308e-07					SPP6	17.25	17.25	EM41	0	0	0				SPP6	17.25	17.25	EM41	0	0	0
SPP7	13.9	13.9	EM42	0.621304	0.615476	0.00582868				SPP7	13.9	13.9	EM42	0.575725	0.429047	0.146678				SPP7	13.9	13.9	EM42	0.590511	0.641468	-0.0509564					SPP7	17.25	17.25	EM42	1.5724	1.76664	-0.194239				SPP7	17.25	17.25	EM42	1.74924	2.09835	-0.349105
			EM43	3.15197e-05	4.21474e-05	-1.06278e-05							EM43	3.07695e-05	4.30371e-05	-1.22676e-05							EM43	2.92201e-05	3.52177e-05	-5.99757e-06								EM43	0	0	0							EM43	1e-15	0	1e-15
			EM44	3.15197e-05	4.21474e-05	-1.06278e-05							EM44	3.07695e-05	4.30371e-05	-1.22676e-05							EM44	2.92201e-05	3.52177e-05	-5.99757e-06								EM44	0	0	0							EM44	1e-15	0	1e-15
			EM45	4.0659e-06	4.53278e-06	-4.66879e-07							EM45	3.55095e-06	5.31942e-06	-1.76847e-06							EM45	4.17396e-06	3.83668e-06	3.37285e-07								EM45	0	0	0							EM45	0	0	0
			EM46	0.206034	0.200956	0.00507796							EM46	0.176035	0.202266	-0.026231							EM46	0.243004	0.384085	-0.14108								EM46	0.319759	0.151959	0.1678							EM46	0.262907	0.261696	0.00121073
			EM47	0.206034	0.200956	0.00507796							EM47	0.176035	0.202266	-0.026231							EM47	0.243004	0.384085	-0.14108								EM47	0.319759	0.151959	0.1678							EM47	0.262907	0.261696	0.00121073
			EM48	1.05342e-05	7.50379e-06	3.03045e-06							EM48	1.41258e-05	1.05726e-05	3.55324e-06							EM48	6.67174e-06	1.13295e-05	-4.65773e-06								EM48	0	0	0							EM48	1e-15	0	1e-15
			EM49	1.05342e-05	7.50379e-06	3.03045e-06							EM49	1.41258e-05	1.05726e-05	3.55324e-06							EM49	6.67174e-06	1.13295e-05	-4.65773e-06								EM49	0	0	0							EM49	1e-15	0	1e-15
			EM50	2.36489e-06	1.83483e-06	5.30057e-07							EM50	3.9869e-06	9.73827e-06	-5.75137e-06							EM50	1.57867e-06	1.79698e-06	-2.18308e-07								EM50	0	0	0							EM50	0	0	0
			EM51	2.1695e-05	2.36856e-05	-1.99058e-06							EM51	2.05633e-05	3.37561e-05	-1.31928e-05							EM51	2.36422e-05	2.09354e-05	2.70675e-06								EM51	0	0	0							EM51	5e-15	0	5e-15
			EM52	3.62655e-05	3.9408e-05	-3.14251e-06							EM52	3.94529e-05	6.42149e-05	-2.4762e-05							EM52	3.72161e-05	3.11599e-05	6.0562e-06								EM52	0	1e-15	-1e-15							EM52	4e-15	0	4e-15
			EM53	9.67627e-06	1.0561e-05	-8.84698e-07							EM53	8.41077e-06	8.93318e-06	-5.2241e-07							EM53	9.75522e-06	8.74619e-06	1.00903e-06								EM53	0	0	0							EM53	2e-15	0	2e-15
			EM54	3.63483e-05	4.14237e-05	-5.07533e-06							EM54	3.59986e-05	6.02567e-05	-2.42581e-05							EM54	3.77083e-05	3.1362e-05	6.34625e-06								EM54	0	1e-15	-1e-15							EM54	1e-14	0	1e-14
			EM55	0.321236	0.298366	0.0228705							EM55	0.296999	0.231702	0.0652973							EM55	0.34404	0.388053	-0.0440131								EM55	1.33382	0.621884	0.711934							EM55	0.744423	1.41759	-0.673163
			EM56	0.0151719	0.0165138	-0.00134189							EM56	0.0147335	0.0360092	-0.0212757							EM56	0.015032	0.0131306	0.00190139								EM56	0.0571553	0.033043	0.0241124							EM56	0.0390193	0.0881862	-0.0491669
			EM57	0.0151719	0.0165138	-0.00134189							EM57	0.0147335	0.0360092	-0.0212757							EM57	0.015032	0.0131306	0.00190139								EM57	0.0571553	0.033043	0.0241124							EM57	0.0390193	0.0881862	-0.0491669
			EM58	5.42675e-05	7.13446e-05	-1.70772e-05							EM58	5.49128e-05	8.7609e-05	-3.26962e-05							EM58	4.88212e-05	5.58238e-05	-7.00261e-06								EM58	0	0	0							EM58	1e-15	0	1e-15
			EM59	0.0143517	0.0154972	-0.00114548							EM59	0.0139718	0.00701566	0.00695612							EM59	0.0141338	0.0119461	0.0021877								EM59	0.0401697	0.0298233	0.0103464							EM59	0.0342071	0.0156248	0.0185823
			EM60	0.158666	0.150054	0.00861191							EM60	0.149927	0.146602	0.0033248							EM60	0.18491	0.214739	-0.0298286								EM60	0.186955	0.142795	0.0441602							EM60	0.133899	0.28229	-0.148391
			EM61	0.0143517	0.0154972	-0.00114548							EM61	0.0139718	0.00701566	0.00695612							EM61	0.0141338	0.0119461	0.0021877								EM61	0.0401697	0.0298233	0.0103464							EM61	0.0342071	0.0156248	0.0185823
			EM62	4.55189e-05	4.87416e-05	-3.22267e-06							EM62	4.26791e-05	0.000307199	-0.00026452							EM62	5.73844e-05	8.02173e-05	-2.2833e-05								EM62	0	0	0							EM62	9e-15	0	9e-15
			EM63	2.33516e-05	2.56749e-05	-2.32338e-06							EM63	2.12162e-05	3.79918e-05	-1.67756e-05							EM63	2.50421e-05	2.31448e-05	1.89725e-06								EM63	0	0	0							EM63	5e-15	0	5e-15
			EM64	4.56536e-05	5.17658e-05	-6.11224e-06							EM64	4.00518e-05	9.78893e-05	-5.78376e-05							EM64	4.46069e-05	4.20552e-05	2.5517e-06								EM64	0	1e-15	-1e-15							EM64	6e-15	0	6e-15
			EM65	2.68133e-05	2.98724e-05	-3.05911e-06							EM65	2.46258e-05	4.3713e-05	-1.90872e-05							EM65	2.77778e-05	2.59519e-05	1.82584e-06								EM65	0	0	0							EM65	4e-15	0	4e-15
			EM66	2.34696e-05	2.61518e-05	-2.68223e-06							EM66	1.99659e-05	3.58733e-05	-1.59075e-05							EM66	2.29911e-05	2.18682e-05	1.12287e-06								EM66	0	0	0							EM66	3e-15	0	3e-15
			EM67	1.95064e-05	2.15464e-05	-2.03995e-06							EM67	1.63734e-05	2.41078e-05	-7.73439e-06							EM67	2.03651e-05	1.84853e-05	1.87976e-06								EM67	0	0	0							EM67	5e-15	0	5e-15
[truncated: 41 more columns]

## Sheet: Diluted culture
Flux variability analysis
Diluted culture (Acidogenesis)																															Diluted culture (Solventogenesis)
*Biomass (Objective Function)										Acetic acid										Butyric acid (Objective Function)											*Biomass (Objective function)										Acetic acid
Original Network			Elementary Modes				External Metabolites			Original Network			Elementary Modes				External Metabolites			Original Network			Elementary Modes				External Metabolites				Original Network			Elementary Modes				External Metabolites			Original Network			Elementary Modes				External Metabolites
	Max	Min		Max	Min	Max-Min		Max	Min		Max	Min		Max	Min	Max-Min		Max	Min		Max	Min		Max	Min	Max-Min						Max	Min		Max	Min	Max-Min		Max	Min		Max	Min		Max	Min	Max-Min		Max
Reaction	Flux (mM/Lh)	Flux (mM/Lh)	EM_MAIN	Flux (mM/Lh)	Flux (mM/Lh)		EXTERNAL METABOLITE	Accumulation rate (mM/h)	Accumulation rate (mM/h)	Reaction	Flux (mM/Lh)	Flux (mM/Lh)	EM_MAIN	Flux (mM/Lh)	Flux (mM/Lh)		EXTERNAL METABOLITE	Accumulation rate (mM/h)	Accumulation rate (mM/h)	Reaction	Flux (mM/Lh)	Flux (mM/Lh)	EM_MAIN	Flux (mM/Lh)	Flux (mM/Lh)		EXTERNAL METABOLITE	Accumulation rate (mM/h)	Accumulation rate (mM/h)		Reaction	Flux (mM/Lh)	Flux (mM/Lh)	EM_MAIN	Flux (mM/Lh)	Flux (mM/Lh)		EXTERNAL METABOLITE	Accumulation rate (mM/h)	Accumulation rate (mM/h)	Reaction	Flux (mM/Lh)	Flux (mM/Lh)	EM_MAIN	Flux (mM/Lh)	Flux (mM/Lh)		EXTERNAL METABOLITE	Accumulation rate (mM/h)
AD1	2.52952	2.52952	EM1	0.00026326	0.000259949	3.31193e-06	H2	45.2891	45.2891	AD1	2.52952	2.52952	EM1	0.000245141	0.000624535	-0.000379394	H2	45.2891	45.2891	AD1	2.52952	2.52952	EM1	0.000278859	0.00021122	6.76391e-05	H2	45.2891	45.2891		AD1	165.214	165.214	EM1	5.22237e-05	0.000218449	-0.000166225	H2	78.1519	78.1519	AD1	165.214	165.214	EM1	5.20564e-05	1.06543e-05	4.14021e-05	H2	78.1519
APP1	56.095	56.095	EM2	0.000215795	0.000217418	-1.62303e-06	*Biomass	83.8	83.8	APP1	56.095	56.095	EM2	0.000226095	2.07745e-05	0.000205321	*Biomass	83.8	83.8	APP1	56.095	56.095	EM2	0.000205471	0.000227542	-2.2071e-05	*Biomass	83.8	83.8		APP1	93.5626	93.5626	EM2	4.43771e-05	7.13268e-05	-2.69497e-05	*Biomass	14.4	14.4	APP1	93.5626	93.5626	EM2	4.6946e-05	6.0473e-05	-1.35271e-05	*Biomass	14.4
APP2	56.095	56.095	EM3	0.0499976	0.0514676	-0.00147002	CO2	221.82	221.82	APP2	56.095	56.095	EM3	0.0522116	0.00554659	0.046665	CO2	221.82	221.82	APP2	56.095	56.095	EM3	0.0521318	0.102402	-0.0502707	CO2	221.82	221.82		APP2	41.5626	41.5626	EM3	1.11409	0.853115	0.26097	CO2	255.75	255.75	APP2	41.5626	41.5626	EM3	1.12473	0.944072	0.180656	CO2	255.75
APP3	56.095	56.095	EM4	0.21459	0.214319	0.000271788	Acetate	35	35	APP3	56.095	56.095	EM4	0.21523	0.210305	0.00492583	Acetate	35	35	APP3	56.095	56.095	EM4	0.212182	0.194251	0.0179308	Acetate	35	35		APP3	41.5626	41.5626	EM4	0.426073	0.326272	0.0998009	Acetate	-11.9	-11.9	APP3	41.5626	41.5626	EM4	0.427769	0.38145	0.0463192	Acetate	-11.9
APP4	56.095	56.095	EM5	0.00360377	0.00360379	-1.31718e-08	Butyrate	56.095	56.095	APP4	56.095	56.095	EM5	0.00360328	0.00360953	-6.2496e-06	Butyrate	56.095	56.095	APP4	56.095	56.095	EM5	0.00360478	0.00360948	-4.69942e-06	Butyrate	56.095	56.095		APP4	41.5626	41.5626	EM5	1.93056e-05	3.23669e-05	-1.30612e-05	Butyrate	-25.3	-25.3	APP4	41.5626	41.5626	EM5	2.21294e-05	1.70961e-05	5.0333e-06	Butyrate	-25.3
APP6	35	35	EM6	1e-15	2.9279e-09	-2.9279e-09	Acetone	0	0	APP6	35	35	EM6	1.11699e-08	7.6e-14	1.11698e-08	Acetone	0	0	APP6	35	35	EM6	4.03126e-09	1.3525e-11	4.01773e-09	Acetone	0	0		APP6	-0.275056	-1.15543	EM6	1.60208	1.30094	0.301144	Acetone	52	52	APP6	-0.275056	-1.15543	EM6	1.60855	1.50374	0.104812	Acetone	52
APP7	35	35	EM7	0	8.94046e-10	-8.94046e-10	Ethanol	0	0	APP7	35	35	EM7	2.09181e-09	2e-14	2.09179e-09	Ethanol	0	0	APP7	35	35	EM7	9.27583e-10	2.447e-12	9.25136e-10	Ethanol	0	0		APP7	-0.275056	-1.15543	EM7	0.171598	0.273693	-0.102094	Ethanol	15.7	15.7	APP7	-0.275056	-1.15543	EM7	0.176122	0.292297	-0.116176	Ethanol	15.7
APP8	56.095	56.095	EM8	0	8.43763e-10	-8.43763e-10	Butanol	0	0	APP8	56.095	56.095	EM8	2.04131e-09	1.6e-14	2.04129e-09	Butanol	0	0	APP8	56.095	56.095	EM8	8.69173e-10	2.168e-12	8.67005e-10	Butanol	0	0		APP8	15.0751	15.9554	EM8	7.99663	5.09806	2.89857	Butanol	66.8626	66.8626	APP8	15.0751	15.9554	EM8	8.44058	6.61727	1.82331	Butanol	66.8626
APP9	56.095	56.095	EM9	0	1.01812e-09	-1.01812e-09	H2O	189.109	189.109	APP9	56.095	56.095	EM9	2.90895e-09	2.1e-14	2.90893e-09	H2O	189.109	189.109	APP9	56.095	56.095	EM9	1.399e-09	4.108e-12	1.39489e-09	H2O	189.109	189.109		APP9	15.0751	15.9554	EM9	0.618923	0.542433	0.0764898	H2O	198.128	198.128	APP9	15.0751	15.9554	EM9	0.624537	0.349387	0.27515	H2O	198.128
BP1	0.037427	0.037427	EM10	0	5.6614e-11	-5.6614e-11	Glucose	100	100	BP1	0.037427	0.037427	EM10	2.90513e-09	4e-14	2.90509e-09	Glucose	100	100	BP1	0.037427	0.037427	EM10	9.38302e-10	4.667e-12	9.33635e-10	Glucose	100	100		BP1	0.006431	0.006431	EM10	11.4651	16.3457	-4.88061	Glucose	100	100	BP1	0.006431	0.006431	EM10	10.5612	15.1442	-4.58301	Glucose	100
EM1	45.2891	45.2891	EM11	0	6.93974e-10	-6.93974e-10				EM1	45.2891	45.2891	EM11	1.60709e-09	1.5e-14	1.60708e-09				EM1	45.2891	45.2891	EM11	7.19765e-10	1.832e-12	7.17933e-10					EM1	78.1519	78.1519	EM11	0.16173	0.189829	-0.0280995				EM1	78.1519	78.1519	EM11	0.159761	0.240319	-0.0805579
EM10	83.8	83.8	EM12	0	6.6012e-10	-6.6012e-10	Biomass is an objective function for all calculation in this sheet with a .			EM10	83.8	83.8	EM12	2.95048e-09	6.6e-14	2.95041e-09				EM10	83.8	83.8	EM12	1.41137e-09	5.199e-12	1.40617e-09					EM10	14.4	14.4	EM12	1.3029	1.33584	-0.0329388				EM10	14.4	14.4	EM12	1.31937	0.101421	1.21795
EM3	221.82	221.82	EM13	0	6.82282e-10	-6.82282e-10	fixed flux value.			EM3	221.82	221.82	EM13	1.58613e-09	1.3e-14	1.58612e-09				EM3	221.82	221.82	EM13	7.0145e-10	1.698e-12	6.99752e-10					EM3	255.75	255.75	EM13	0.233835	0.283807	-0.0499725				EM3	255.75	255.75	EM13	0.226698	0.310943	-0.0842452
EM4	35	35	EM14	0	8.94046e-10	-8.94046e-10				EM4	35	35	EM14	2.09181e-09	2e-14	2.09179e-09				EM4	35	35	EM14	9.27583e-10	2.447e-12	9.25136e-10					EM4	-11.9	-11.9	EM14	0.171598	0.273693	-0.102094				EM4	-11.9	-11.9	EM14	0.176122	0.292297	-0.116176
EM5	56.095	56.095	EM15	0	1.01812e-09	-1.01812e-09	Max - maximizing the flux of a specific metabolite when biomass is an objective			EM5	56.095	56.095	EM15	2.90895e-09	2.1e-14	2.90893e-09				EM5	56.095	56.095	EM15	1.399e-09	4.108e-12	1.39489e-09					EM5	-25.3	-25.3	EM15	0.618923	0.542433	0.0764898				EM5	-25.3	-25.3	EM15	0.624537	0.349387	0.27515
EM6	0	0	EM16	0	6.93974e-10	-6.93974e-10	function with fixed flux value.			EM6	0	0	EM16	1.60709e-09	1.5e-14	1.60708e-09				EM6	0	0	EM16	7.19765e-10	1.832e-12	7.17933e-10					EM6	52	52	EM16	0.16173	0.189829	-0.0280995				EM6	52	52	EM16	0.159761	0.240319	-0.0805579
EM7	0	0	EM17	0	6.82282e-10	-6.82282e-10				EM7	0	0	EM17	1.58613e-09	1.3e-14	1.58612e-09				EM7	0	0	EM17	7.0145e-10	1.698e-12	6.99752e-10					EM7	15.7	15.7	EM17	0.233835	0.283807	-0.0499725				EM7	15.7	15.7	EM17	0.226698	0.310943	-0.0842452
EM8	0	0	EM18	0	6.22627e-10	-6.22627e-10	Min - minimizing the flux of a specific metabolite when biomass is an objective			EM8	0	0	EM18	1.921e-09	7e-15	1.921e-09				EM8	0	0	EM18	8.00981e-10	2.275e-12	7.98706e-10					EM8	66.8626	66.8626	EM18	0.328265	0.104846	0.223419				EM8	66.8626	66.8626	EM18	0.327603	0.617063	-0.28946
EM9	189.109	189.109	EM19	0	4.24165e-10	-4.24165e-10	function with fixed flux value.			EM9	189.109	189.109	EM19	2.40629e-09	8e-15	2.40629e-09				EM9	189.109	189.109	EM19	7.66342e-10	2.83e-12	7.63512e-10					EM9	198.128	198.128	EM19	1.5016	5.90034	-4.39874				EM9	198.128	198.128	EM19	1.44118	1.11293	0.328254
EMP1	100	100	EM20	0	1.67153e-10	-1.67153e-10				EMP1	100	100	EM20	3.89567e-10	4e-15	3.89563e-10				EMP1	100	100	EM20	1.7411e-10	4.32e-13	1.73678e-10					EMP1	100	100	EM20	0.0411409	0.0523411	-0.0112002				EMP1	100	100	EM20	0.0401231	0.0583902	-0.0182671
EMP2	100	100	EM21	0	3.89396e-10	-3.89396e-10	Observation:			EMP2	100	100	EM21	1.33745e-09	5e-15	1.33745e-09				EMP2	100	100	EM21	5.27773e-10	1.798e-12	5.25975e-10					EMP2	100	100	EM21	0.282549	0.139493	0.143056				EMP2	100	100	EM21	0.284358	0.421704	-0.137345
EMP3	96.8561	96.8561	EM22	0	4.04296e-10	-4.04296e-10	Flux distribution of original network is unique and there is variation in			EMP3	96.8561	96.8561	EM22	1.16868e-09	6e-15	1.16867e-09				EMP3	96.8561	96.8561	EM22	5.72572e-10	1.528e-12	5.71044e-10					EMP3	99.4598	99.4598	EM22	0.316658	0.243495	0.0731626				EMP3	99.4598	99.4598	EM22	0.316481	0.178116	0.138365
EMP4	96.8561	96.8561	EM23	0	1.34624e-10	-1.34624e-10	sets of flux values in EMs (comparison is based on maximizing and			EMP4	96.8561	96.8561	EM23	3.12664e-10	3e-15	3.12661e-10				EMP4	96.8561	96.8561	EM23	1.40275e-10	3.48e-13	1.39927e-10					EMP4	99.4598	99.4598	EM23	0.0354461	0.0369484	-0.00150227				EMP4	99.4598	99.4598	EM23	0.035261	0.0359708	-0.000709852
EMP5	192.14	192.14	EM24	0	1.87092e-10	-1.87092e-10	minimizing a specific metabolite when flux value of biomass was fixed)			EMP5	192.14	192.14	EM24	6.07863e-10	7e-15	6.07856e-10				EMP5	192.14	192.14	EM24	2.75445e-10	8.94e-13	2.74551e-10					EMP5	198.649	198.649	EM24	0.20053	0.167551	0.0329783				EMP5	198.649	198.649	EM24	0.206404	0.0599914	0.146413
EMP6	189.109	189.109	EM25	0	6.22627e-10	-6.22627e-10				EMP6	189.109	189.109	EM25	1.921e-09	7e-15	1.921e-09				EMP6	189.109	189.109	EM25	8.00981e-10	2.275e-12	7.98706e-10					EMP6	198.128	198.128	EM25	0.328265	0.104846	0.223419				EMP6	198.128	198.128	EM25	0.327603	0.617063	-0.28946
EMP7	81.174	81.174	EM26	0	1.67153e-10	-1.67153e-10	Note: This methodology is adapted from Mahadevan and Schilling_2003 to			EMP7	81.174	81.174	EM26	3.89567e-10	4e-15	3.89563e-10				EMP7	81.174	81.174	EM26	1.7411e-10	4.32e-13	1.73678e-10					EMP7	96.765	96.765	EM26	0.0411409	0.0523411	-0.0112002				EMP7	96.765	96.765	EM26	0.0401231	0.0583902	-0.0182671
HPP1	159.915	159.915	EM27	0	4.04296e-10	-4.04296e-10	calculate the flux variability wherein the same optimal objective.			HPP1	159.915	159.915	EM27	1.16868e-09	6e-15	1.16867e-09				HPP1	159.915	159.915	EM27	5.72572e-10	1.528e-12	5.71044e-10					HPP1	193.112	193.112	EM27	0.316658	0.243495	0.0731626				HPP1	193.112	193.112	EM27	0.316481	0.178116	0.138365
HPP2	112.282	112.282	EM28	0	1.34624e-10	-1.34624e-10				HPP2	112.282	112.282	EM28	3.12664e-10	3e-15	3.12661e-10				HPP2	112.282	112.282	EM28	1.40275e-10	3.48e-13	1.39927e-10					HPP2	19.2943	19.2943	EM28	0.0354461	0.0369484	-0.00150227				HPP2	19.2943	19.2943	EM28	0.035261	0.0359708	-0.000709852
HPP3	2.34381	2.34381	EM29	0	5.86e-13	-5.86e-13				HPP3	2.34381	2.34381	EM29	1.482e-12	0	1.482e-12				HPP3	2.34381	2.34381	EM29	5.78e-13	2e-15	5.76e-13					HPP3	95.6657	95.6657	EM29	5.17694e-05	6.03614e-05	-8.59203e-06				HPP3	95.6657	95.6657	EM29	5.16106e-05	7.86618e-05	-2.70512e-05
HPP4	45.2891	45.2891	EM30	0	1.7e-13	-1.7e-13				HPP4	45.2891	45.2891	EM30	4.17e-13	0	4.17e-13				HPP4	45.2891	45.2891	EM30	1.71e-13	0	1.71e-13					HPP4	78.1519	78.1519	EM30	1.77788e-05	2.18309e-05	-4.05212e-06				HPP4	78.1519	78.1519	EM30	1.7037e-05	2.86463e-05	-1.16093e-05
PPP2	3.1439	3.1439	EM31	3e-15	8.45631e-09	-8.4563e-09				PPP2	3.1439	3.1439	EM31	1.87023e-08	1.42e-13	1.87022e-08				PPP2	3.1439	3.1439	EM31	9.67207e-09	2.0742e-11	9.65133e-09					PPP2	0.540241	0.540241	EM31	1.88447	1.82987	0.0546045				PPP2	0.540241	0.540241	EM31	1.90584	1.70108	0.204762
PPP3	-3.1439	-3.1439	EM32	0	1.347e-12	-1.347e-12				PPP3	-3.1439	-3.1439	EM32	3.104e-12	0	3.104e-12				PPP3	-3.1439	-3.1439	EM32	1.332e-12	4e-15	1.328e-12					PPP3	-0.540241	-0.540241	EM32	0.000101509	9.30874e-05	8.42152e-06				PPP3	-0.540241	-0.540241	EM32	0.00010312	8.96361e-05	1.34843e-05
PPP4	-1.57195	-1.57195	EM33	0	2.46e-13	-2.46e-13				PPP4	-1.57195	-1.57195	EM33	5.81e-13	0	5.81e-13				PPP4	-1.57195	-1.57195	EM33	2.51e-13	1e-15	2.5e-13					PPP4	-0.270121	-0.270121	EM33	3.49042e-05	3.22942e-05	2.60998e-06				PPP4	-0.270121	-0.270121	EM33	3.55065e-05	4.44461e-05	-8.93958e-06
PPP5	-1.57195	-1.57195	EM34	0	1.7e-13	-1.7e-13				PPP5	-1.57195	-1.57195	EM34	4.17e-13	0	4.17e-13				PPP5	-1.57195	-1.57195	EM34	1.71e-13	0	1.71e-13					PPP5	-0.270121	-0.270121	EM34	1.77788e-05	2.18309e-05	-4.05212e-06				PPP5	-0.270121	-0.270121	EM34	1.7037e-05	2.86463e-05	-1.16093e-05
PPP6	-1.57195	-1.57195	EM35	0	2.46e-13	-2.46e-13				PPP6	-1.57195	-1.57195	EM35	5.81e-13	0	5.81e-13				PPP6	-1.57195	-1.57195	EM35	2.51e-13	1e-15	2.5e-13					PPP6	-0.270121	-0.270121	EM35	3.49042e-05	3.22942e-05	2.60998e-06				PPP6	-0.270121	-0.270121	EM35	3.55065e-05	4.44461e-05	-8.93958e-06
SPP1	0	0	EM36	0	1.2706e-09	-1.2706e-09				SPP1	0	0	EM36	3.22343e-09	1.1e-14	3.22342e-09				SPP1	0	0	EM36	1.53962e-09	3.187e-12	1.53643e-09					SPP1	15.7	15.7	EM36	4.19629	2.90227	1.29402				SPP1	15.7	15.7	EM36	4.16012	3.82148	0.338638
SPP2	0	0	EM37	0	1.136e-12	-1.136e-12				SPP2	0	0	EM37	4.38e-12	0	4.38e-12				SPP2	0	0	EM37	1.036e-12	1e-15	1.035e-12					SPP2	15.7	15.7	EM37	8.9547e-05	8.62683e-05	3.27865e-06				SPP2	15.7	15.7	EM37	8.47535e-05	0.000102055	-1.73011e-05
SPP3	0	0	EM38	0	6.8e-14	-6.8e-14				SPP3	0	0	EM38	1.69e-13	0	1.69e-13				SPP3	0	0	EM38	6.7e-14	0	6.7e-14					SPP3	11.6249	10.7446	EM38	1.46099e-05	1.15623e-05	3.04767e-06				SPP3	11.6249	10.7446	EM38	1.51239e-05	1.15511e-05	3.57287e-06
SPP4	0	0	EM39	1e-15	3.38253e-09	-3.38253e-09				SPP4	0	0	EM39	6.47939e-09	3.8e-13	6.47901e-09				SPP4	0	0	EM39	3.48637e-09	6.539e-12	3.47983e-09					SPP4	40.3751	41.2554	EM39	1.51559	1.21501	0.300578				SPP4	40.3751	41.2554	EM39	1.6558	1.75431	-0.0985078
SPP5	0	0	EM40	0	6.31e-13	-6.31e-13				SPP5	0	0	EM40	1.215e-12	0	1.215e-12				SPP5	0	0	EM40	5.93e-13	4e-15	5.89e-13					SPP5	52	52	EM40	1.29467e-07	2.02019e-05	-2.00724e-05				SPP5	52	52	EM40	1.47479e-07	2.47157e-07	-9.96779e-08
SPP6	0	0	EM41	0	5.2e-14	-5.2e-14				SPP6	0	0	EM41	1.2e-13	0	1.2e-13				SPP6	0	0	EM41	5.2e-14	0	5.2e-14					SPP6	66.8626	66.8626	EM41	1.07564e-05	3.57058e-06	7.18586e-06				SPP6	66.8626	66.8626	EM41	1.02504e-05	3.29238e-06	6.95801e-06
SPP7	0	0	EM42	3e-15	7.81506e-09	-7.81505e-09				SPP7	0	0	EM42	1.29556e-08	1.54e-13	1.29555e-08				SPP7	0	0	EM42	8.2598e-09	1.3279e-11	8.24653e-09					SPP7	66.8626	66.8626	EM42	0.637961	0.306158	0.331803				SPP7	66.8626	66.8626	EM42	0.640192	0.962323	-0.32213
			EM43	0	1.455e-12	-1.455e-12							EM43	1.417e-11	1e-15	1.4169e-11							EM43	2.05e-13	6e-15	1.99e-13								EM43	8.70036e-06	1.57131e-05	-7.01274e-06							EM43	8.30122e-06	1.32999e-05	-4.99866e-06
			EM44	0	1.455e-12	-1.455e-12							EM44	1.417e-11	1e-15	1.4169e-11							EM44	2.05e-13	6e-15	1.99e-13								EM44	8.70036e-06	1.57131e-05	-7.01274e-06							EM44	8.30122e-06	1.32999e-05	-4.99866e-06
			EM45	0	6.8e-14	-6.8e-14							EM45	1.69e-13	0	1.69e-13							EM45	6.7e-14	0	6.7e-14								EM45	1.46099e-05	1.15623e-05	3.04767e-06							EM45	1.51239e-05	1.15511e-05	3.57287e-06
			EM46	1e-15	2.40206e-09	-2.40206e-09							EM46	4.69488e-09	6.1e-14	4.69482e-09							EM46	2.55876e-09	5.795e-12	2.55296e-09								EM46	0.3103	0.237928	0.072372							EM46	0.311329	0.248798	0.0625309
			EM47	1e-15	2.40206e-09	-2.40206e-09							EM47	4.69488e-09	6.1e-14	4.69482e-09							EM47	2.55876e-09	5.795e-12	2.55296e-09								EM47	0.3103	0.237928	0.072372							EM47	0.311329	0.248798	0.0625309
			EM48	0	2.44e-13	-2.44e-13							EM48	5.39e-13	0	5.39e-13							EM48	2.5e-13	1e-15	2.49e-13								EM48	8.78651e-06	1.36979e-05	-4.91138e-06							EM48	8.63093e-06	1.15195e-05	-2.88854e-06
			EM49	0	2.44e-13	-2.44e-13							EM49	5.39e-13	0	5.39e-13							EM49	2.5e-13	1e-15	2.49e-13								EM49	8.78651e-06	1.36979e-05	-4.91138e-06							EM49	8.63093e-06	1.15195e-05	-2.88854e-06
			EM50	0	5.2e-14	-5.2e-14							EM50	1.2e-13	0	1.2e-13							EM50	5.2e-14	0	5.2e-14								EM50	1.07564e-05	3.57058e-06	7.18586e-06							EM50	1.02504e-05	3.29238e-06	6.95801e-06
			EM51	0	4.83e-13	-4.83e-13							EM51	1.158e-12	0	1.158e-12							EM51	4.88e-13	1e-15	4.87e-13								EM51	6.10899e-05	7.25262e-05	-1.14363e-05							EM51	5.57304e-05	9.32601e-05	-3.75297e-05
			EM52	0	6.03e-13	-6.03e-13							EM52	1.421e-12	0	1.421e-12							EM52	6.22e-13	2e-15	6.2e-13								EM52	0.000114726	0.000100588	1.41375e-05							EM52	0.000121519	0.000123407	-1.88778e-06
			EM53	0	1.56e-13	-1.56e-13							EM53	3.84e-13	0	3.84e-13							EM53	1.61e-13	0	1.61e-13								EM53	3.70797e-05	3.34914e-05	3.58831e-06							EM53	2.39815e-05	3.4125e-05	-1.01435e-05
			EM54	0	5.55e-13	-5.55e-13							EM54	1.315e-12	0	1.315e-12							EM54	5.73e-13	1e-15	5.72e-13								EM54	0.000149494	7.14249e-05	7.80686e-05							EM54	0.000159928	0.000128289	3.16396e-05
			EM55	0.0174882	0.017424	6.4168e-05							EM55	0.016664	0.0234377	-0.00677369							EM55	0.0190043	0.0255763	-0.00657195								EM55	0.273646	0.191602	0.0820435							EM55	0.278412	0.274681	0.00373079
			EM56	0	2.77317e-10	-2.77317e-10							EM56	6.33987e-10	7e-15	6.3398e-10							EM56	2.91542e-10	7.44e-13	2.90798e-10								EM56	0.0451158	0.0617754	-0.0166596							EM56	0.0453947	0.0901853	-0.0447905
			EM57	0	2.77317e-10	-2.77317e-10							EM57	6.33987e-10	7e-15	6.3398e-10							EM57	2.91542e-10	7.44e-13	2.90798e-10								EM57	0.0451158	0.0617754	-0.0166596							EM57	0.0453947	0.0901853	-0.0447905
			EM58	0	1.357e-12	-1.357e-12							EM58	5.87e-13	0	5.87e-13							EM58	1.257e-12	3.1e-14	1.226e-12								EM58	1.63898e-05	2.81322e-05	-1.17424e-05							EM58	1.64586e-05	2.38235e-05	-7.36495e-06
			EM59	0	2.24388e-10	-2.24388e-10							EM59	5.16445e-10	5e-15	5.1644e-10							EM59	2.34448e-10	5.92e-13	2.33856e-10								EM59	0.04805	0.0564991	-0.00844909							EM59	0.0480056	0.0562774	-0.00827177
			EM60	0	9.92684e-10	-9.92684e-10							EM60	2.47127e-09	1.3e-14	2.47126e-09							EM60	1.20739e-09	2.853e-12	1.20454e-09								EM60	0.268068	0.213884	0.0541838							EM60	0.270643	0.169023	0.101619
			EM61	0	2.24388e-10	-2.24388e-10							EM61	5.16445e-10	5e-15	5.1644e-10							EM61	2.34448e-10	5.92e-13	2.33856e-10								EM61	0.04805	0.0564991	-0.00844909							EM61	0.0480056	0.0562774	-0.00827177
			EM62	0	1.967e-12	-1.967e-12							EM62	4.285e-12	0	4.285e-12							EM62	2.005e-12	5e-15	2e-12								EM62	0.000126028	0.00021419	-8.81621e-05							EM62	0.000131929	0.00016781	-3.58813e-05
			EM63	0	4.7e-13	-4.7e-13							EM63	1.145e-12	0	1.145e-12							EM63	4.69e-13	1e-15	4.68e-13								EM63	8.70554e-05	0.000111757	-2.47021e-05							EM63	8.3937e-05	0.00012529	-4.13532e-05
			EM64	0	5.76e-13	-5.76e-13							EM64	1.382e-12	0	1.382e-12							EM64	5.82e-13	1e-15	5.81e-13								EM64	0.000320017	7.82759e-05	0.000241741							EM64	0.000321408	0.000113088	0.000208319
			EM65	0	4.12e-13	-4.12e-13							EM65	1.011e-12	0	1.011e-12							EM65	4.06e-13	1e-15	4.05e-13								EM65	0.000276647	9.86313e-05	0.000178016							EM65	0.000288879	5.79173e-06	0.000283087
			EM66	0	2.86e-13	-2.86e-13							EM66	6.84e-13	0	6.84e-13							EM66	2.88e-13	1e-15	2.87e-13								EM66	0.000155263	6.04432e-06	0.000149218							EM66	0.000162955	0.000228787	-6.58325e-05
			EM67	0	2.37e-13	-2.37e-13							EM67	5.65e-13	0	5.65e-13							EM67	2.38e-13	1e-15	2.37e-13								EM67	0.000199847	0.000139969	5.98775e-05							EM67	0.000211553	0.000339045	-0.000127492
[truncated: 41 more columns]
